# Supplementary material
Source: PubMed Central journal article supplement (PMC7606771)

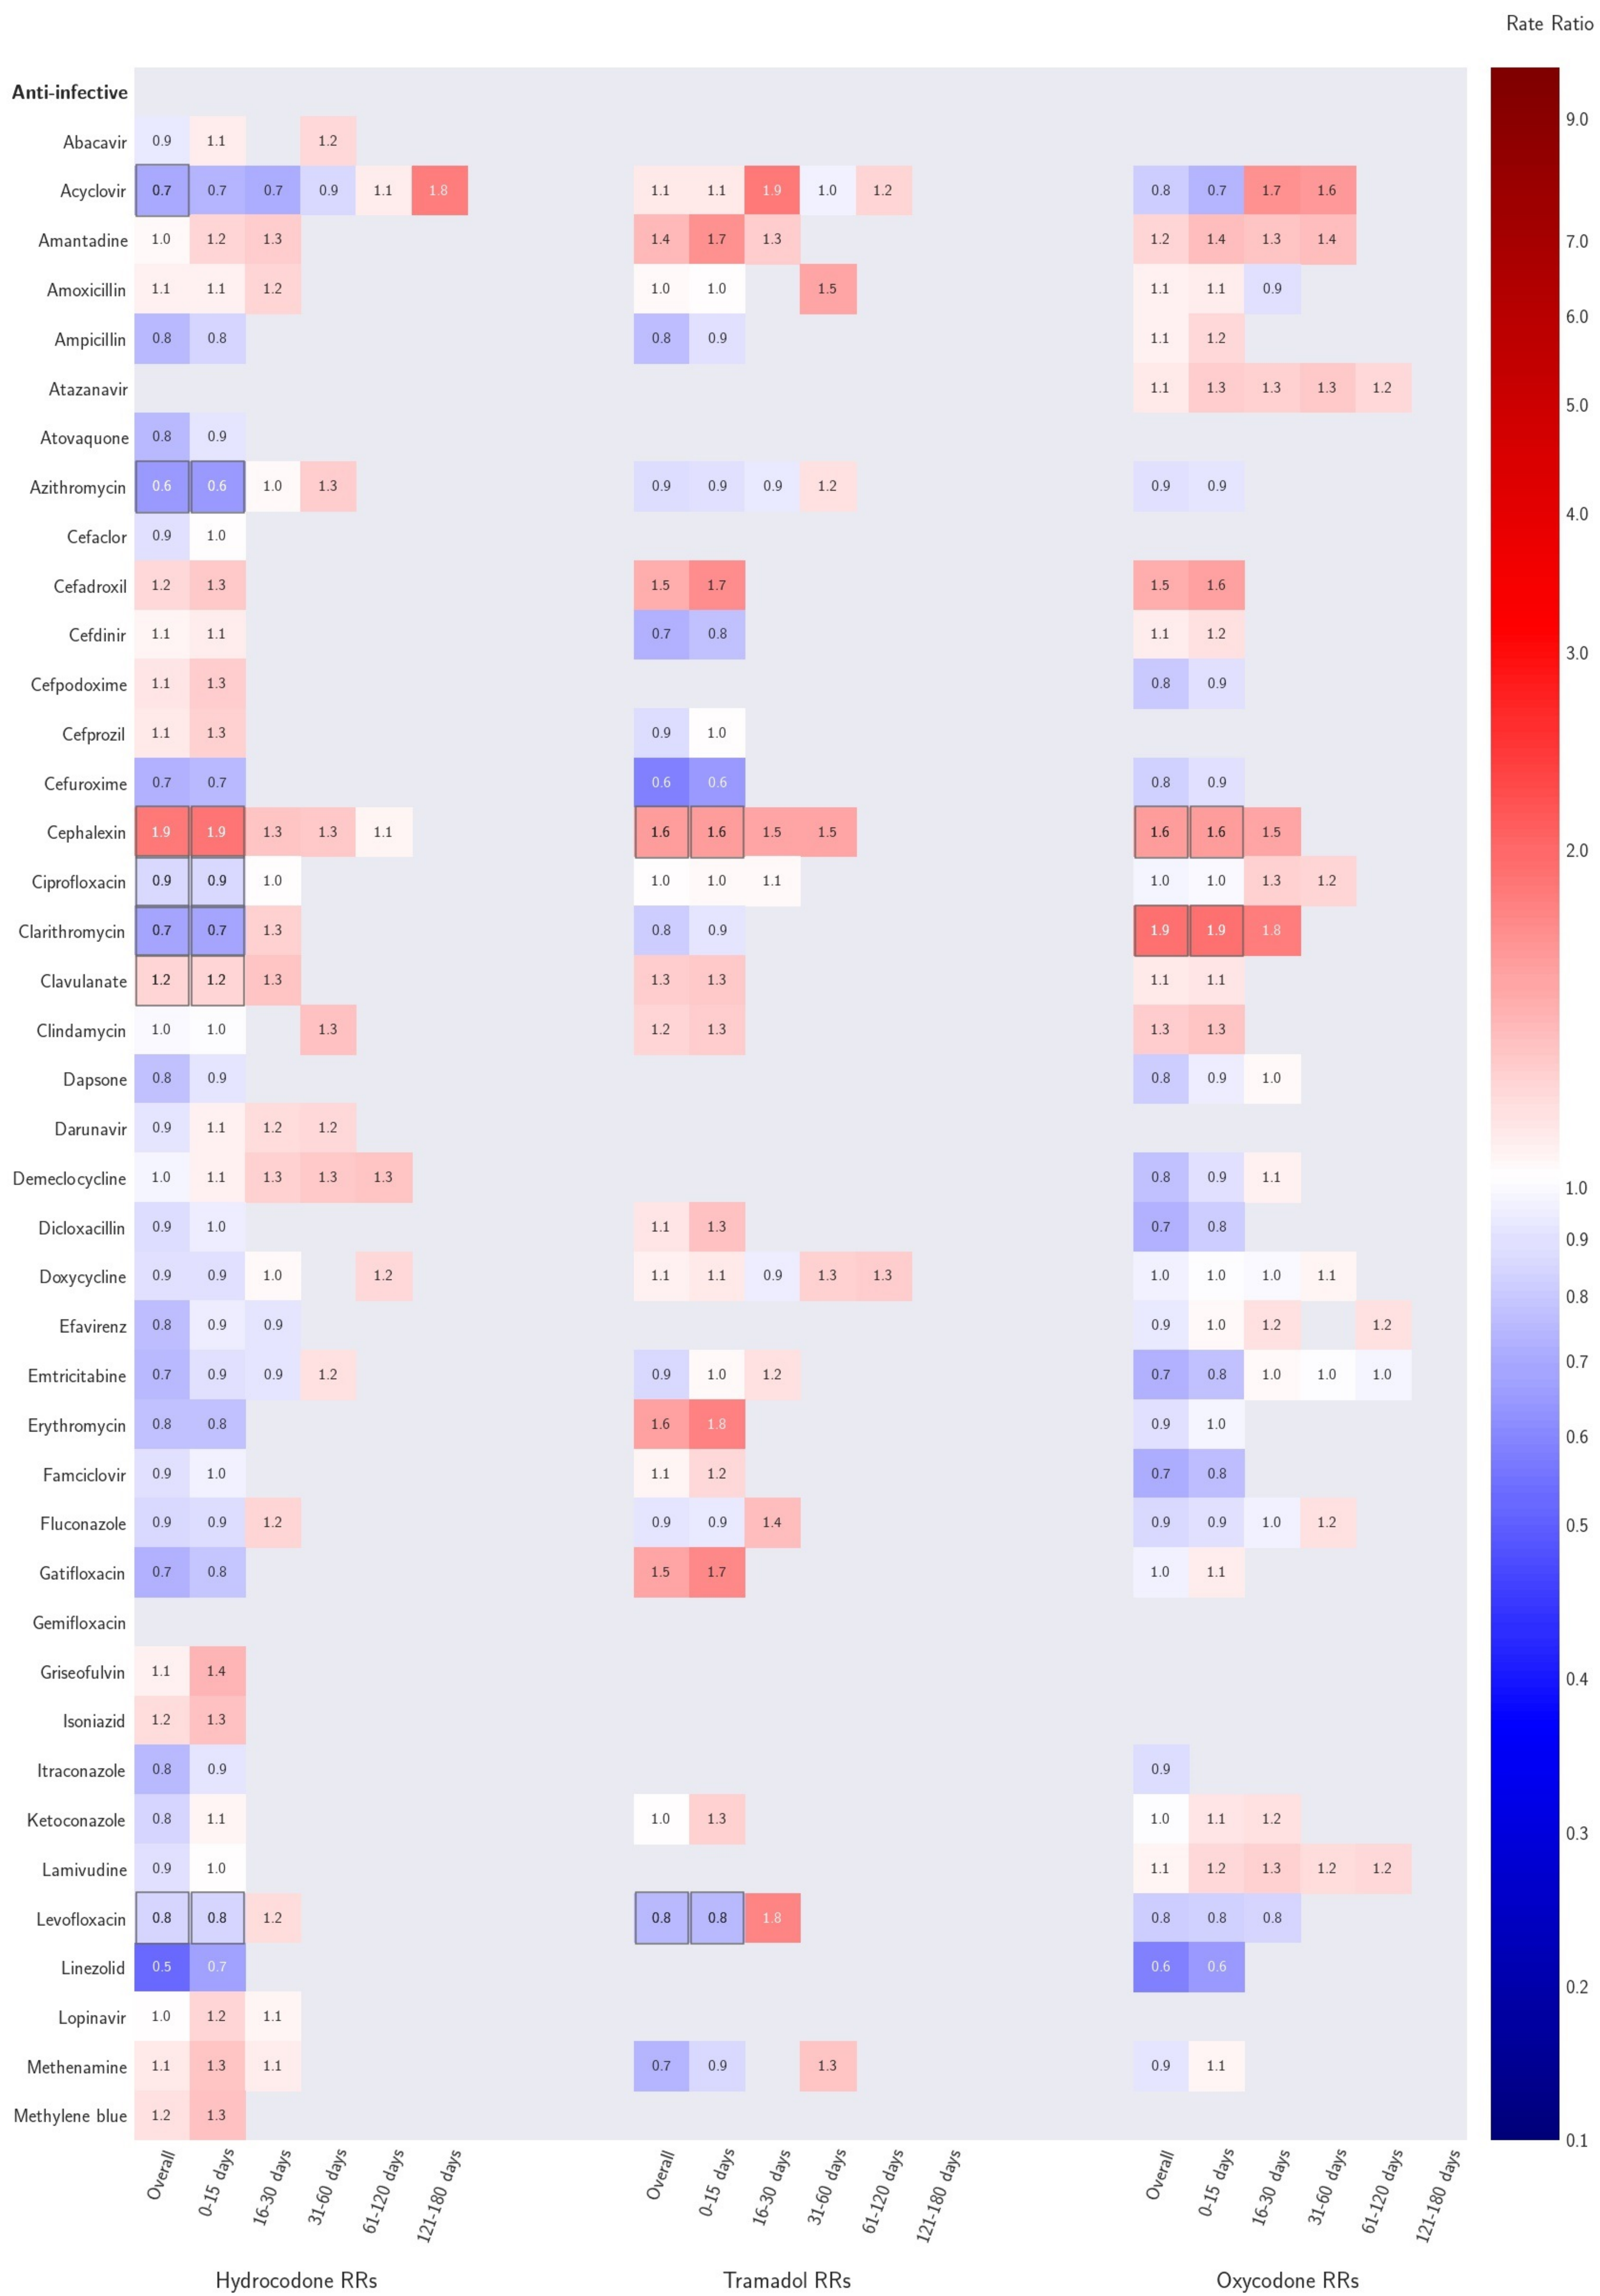

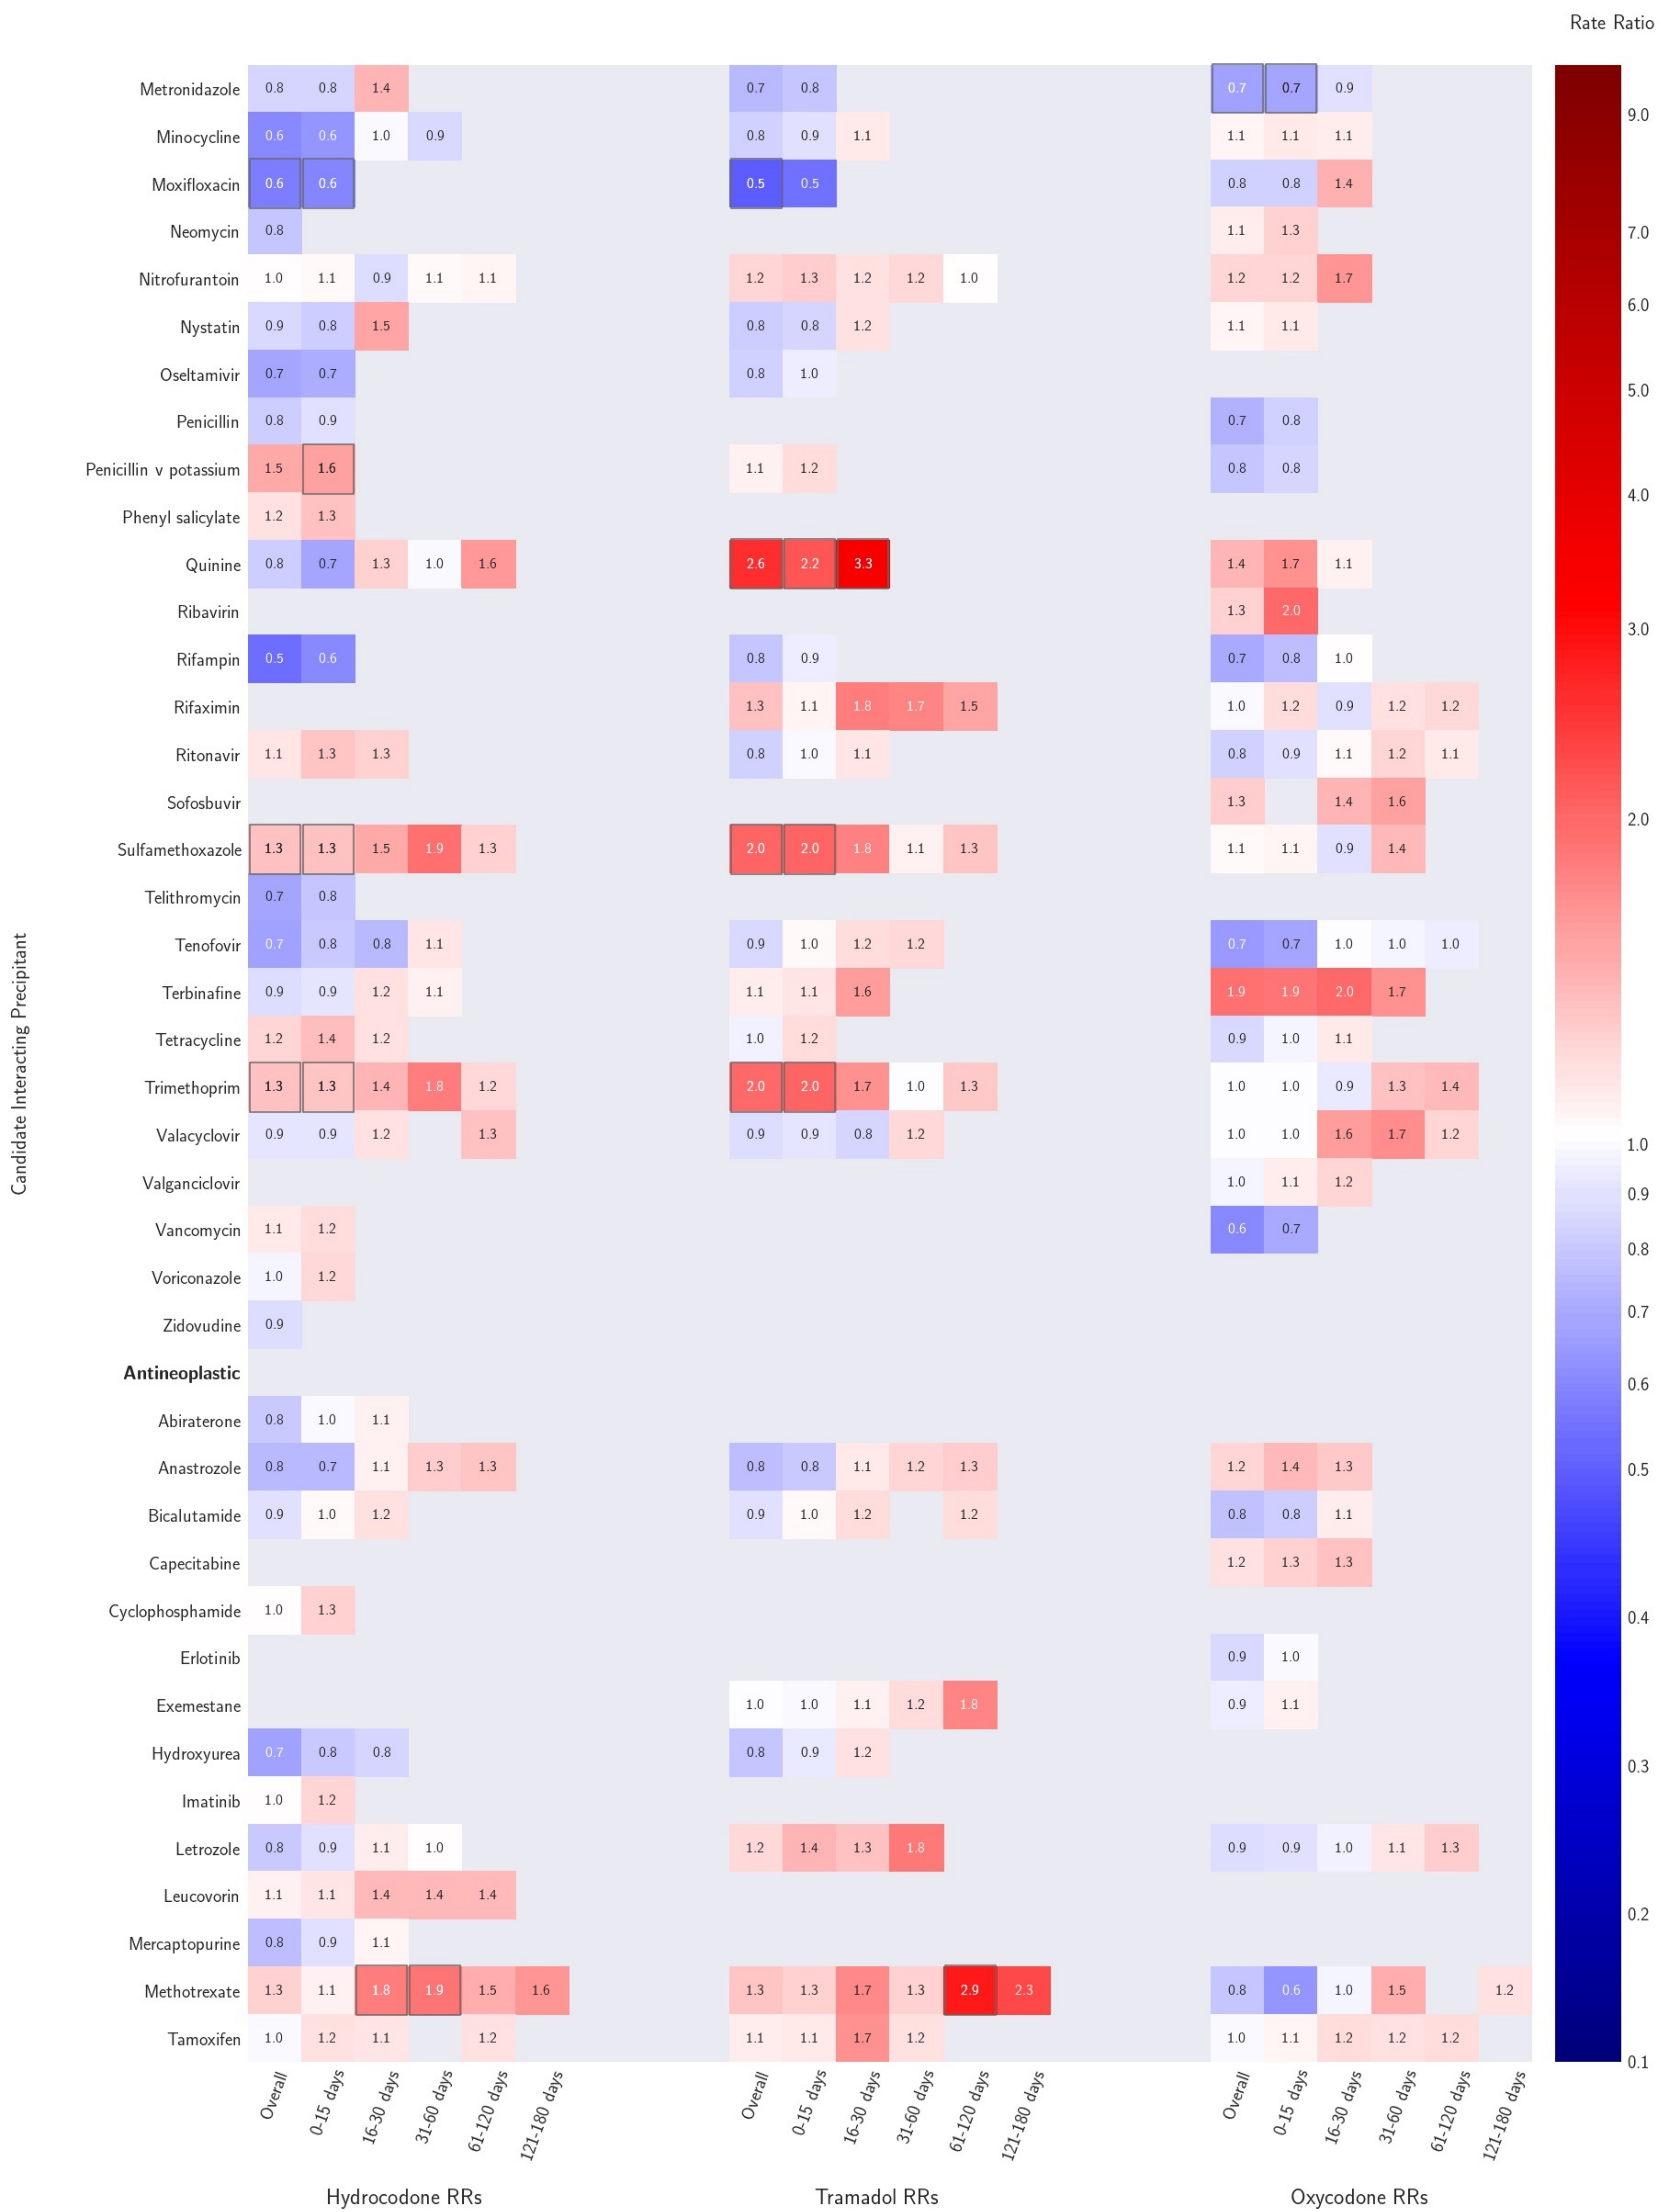



Candidate Interacting Precipitant

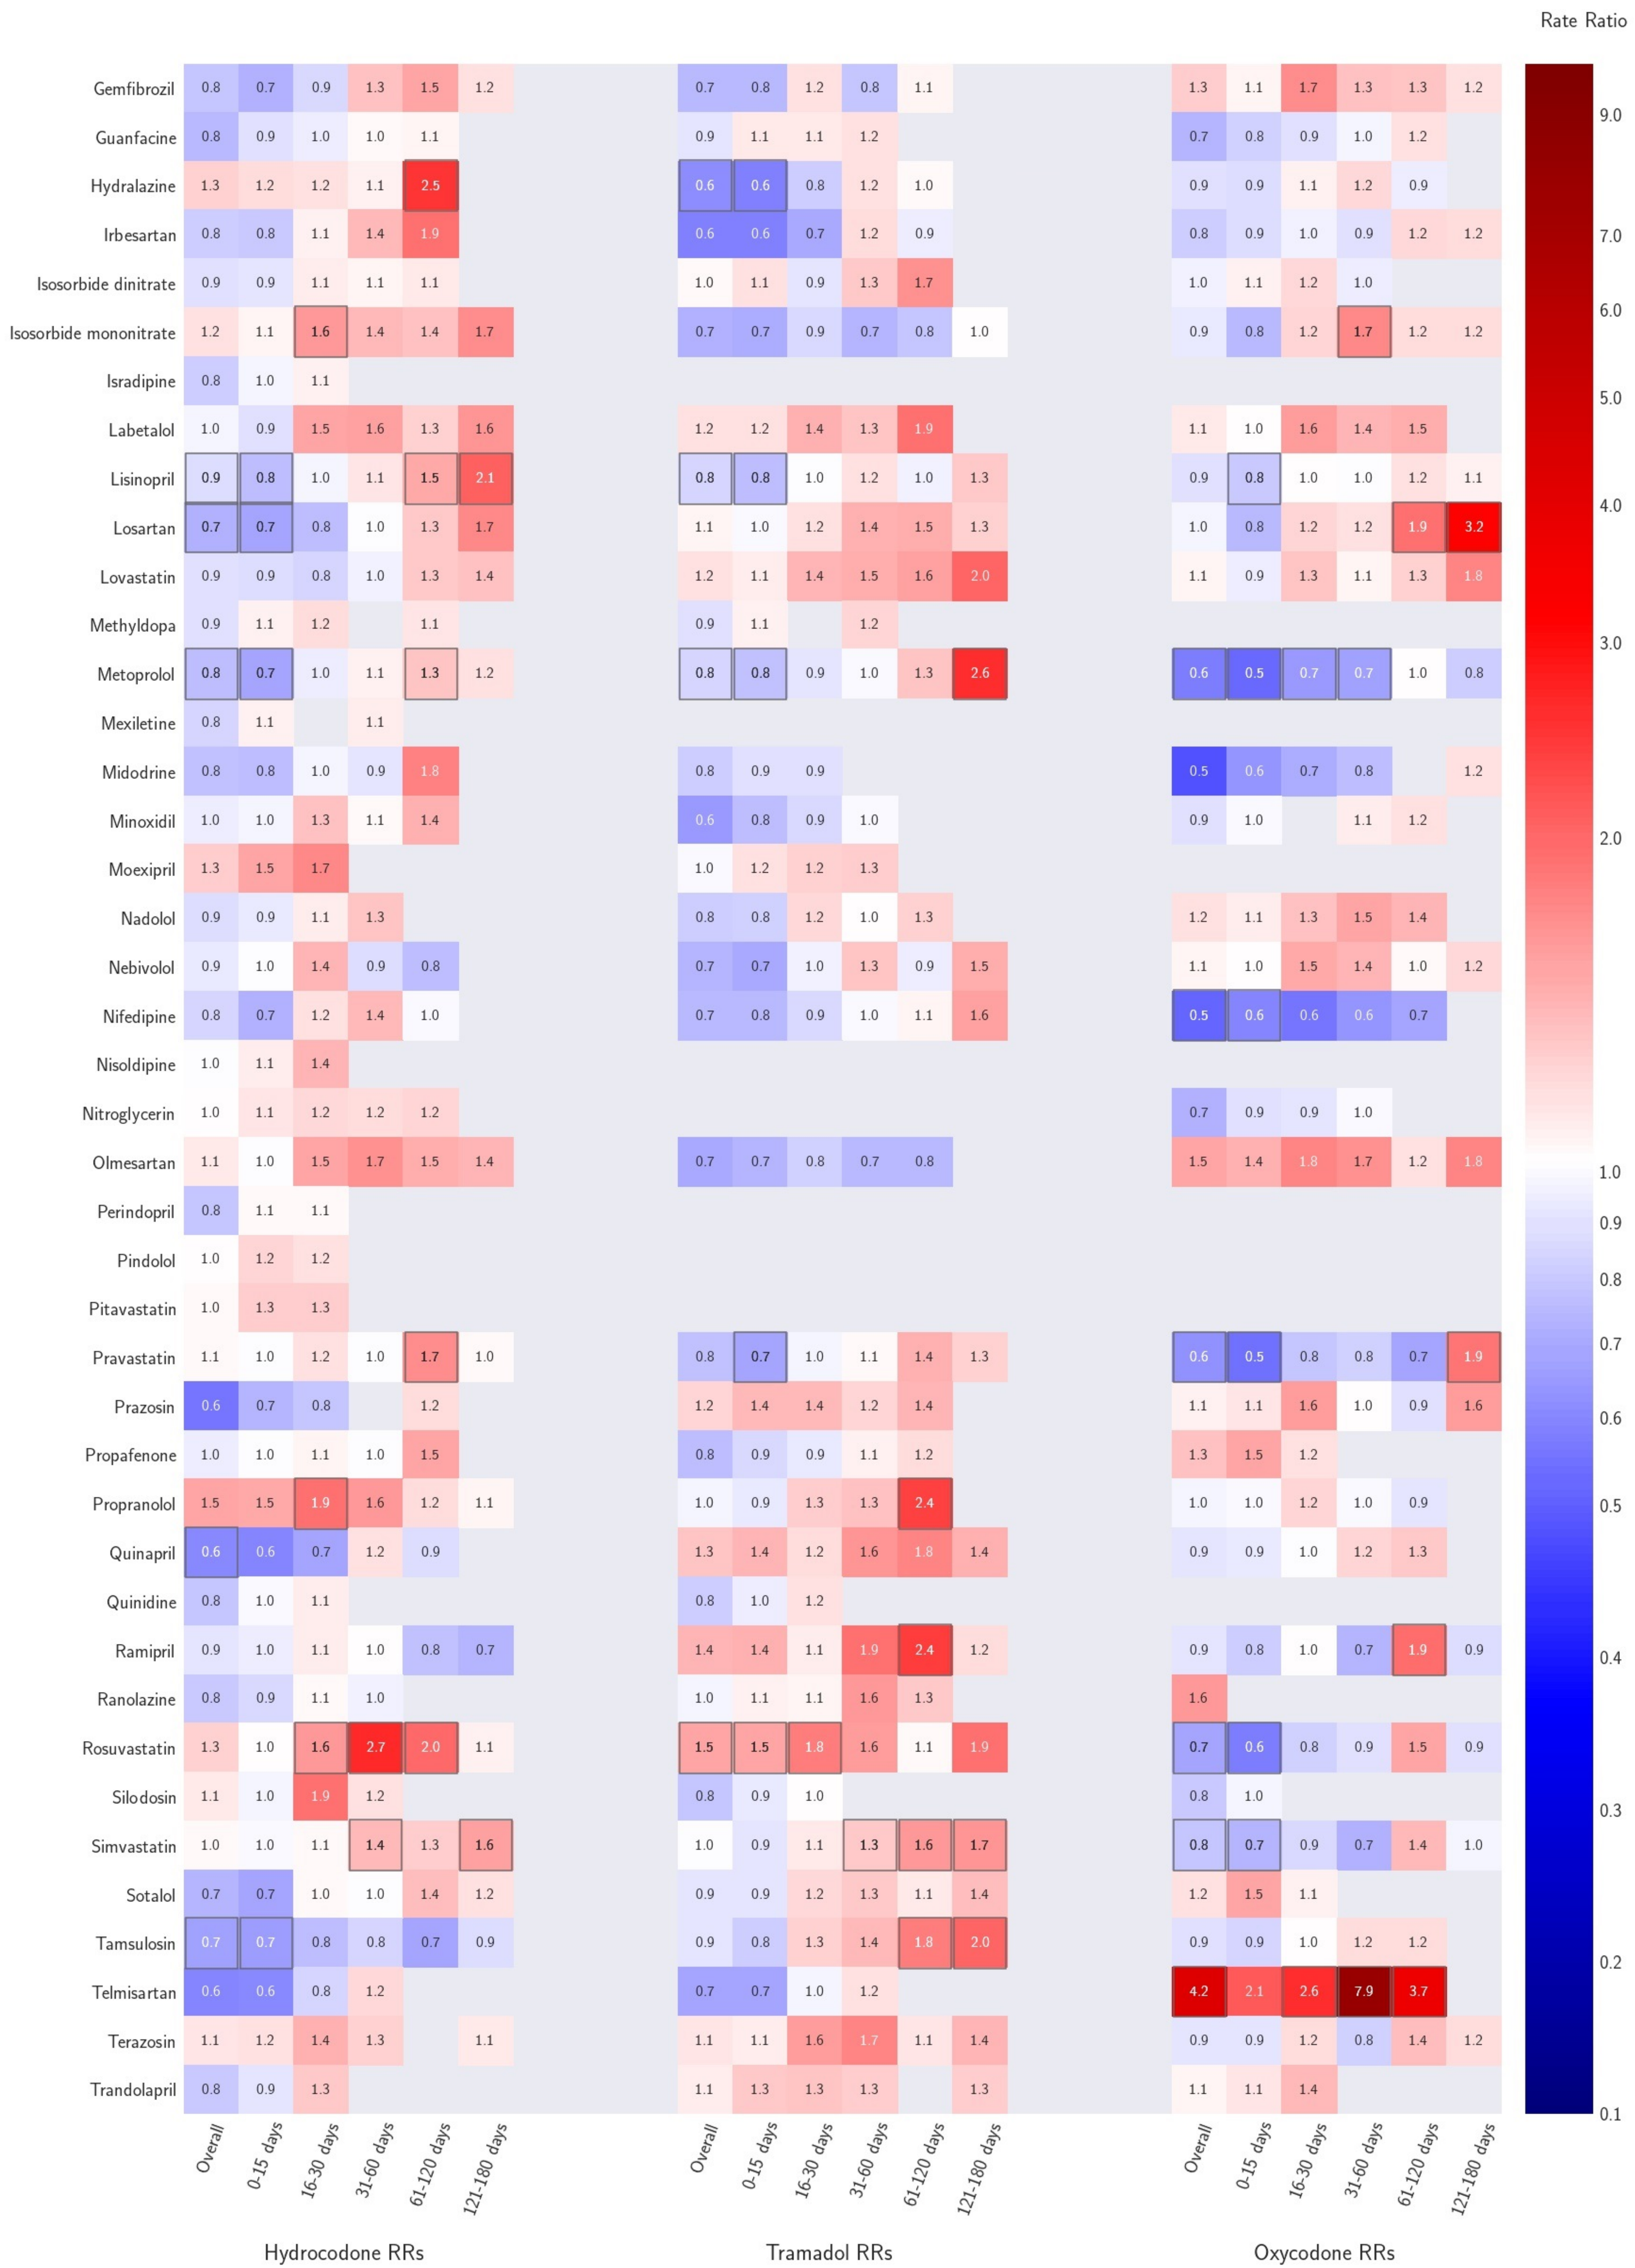

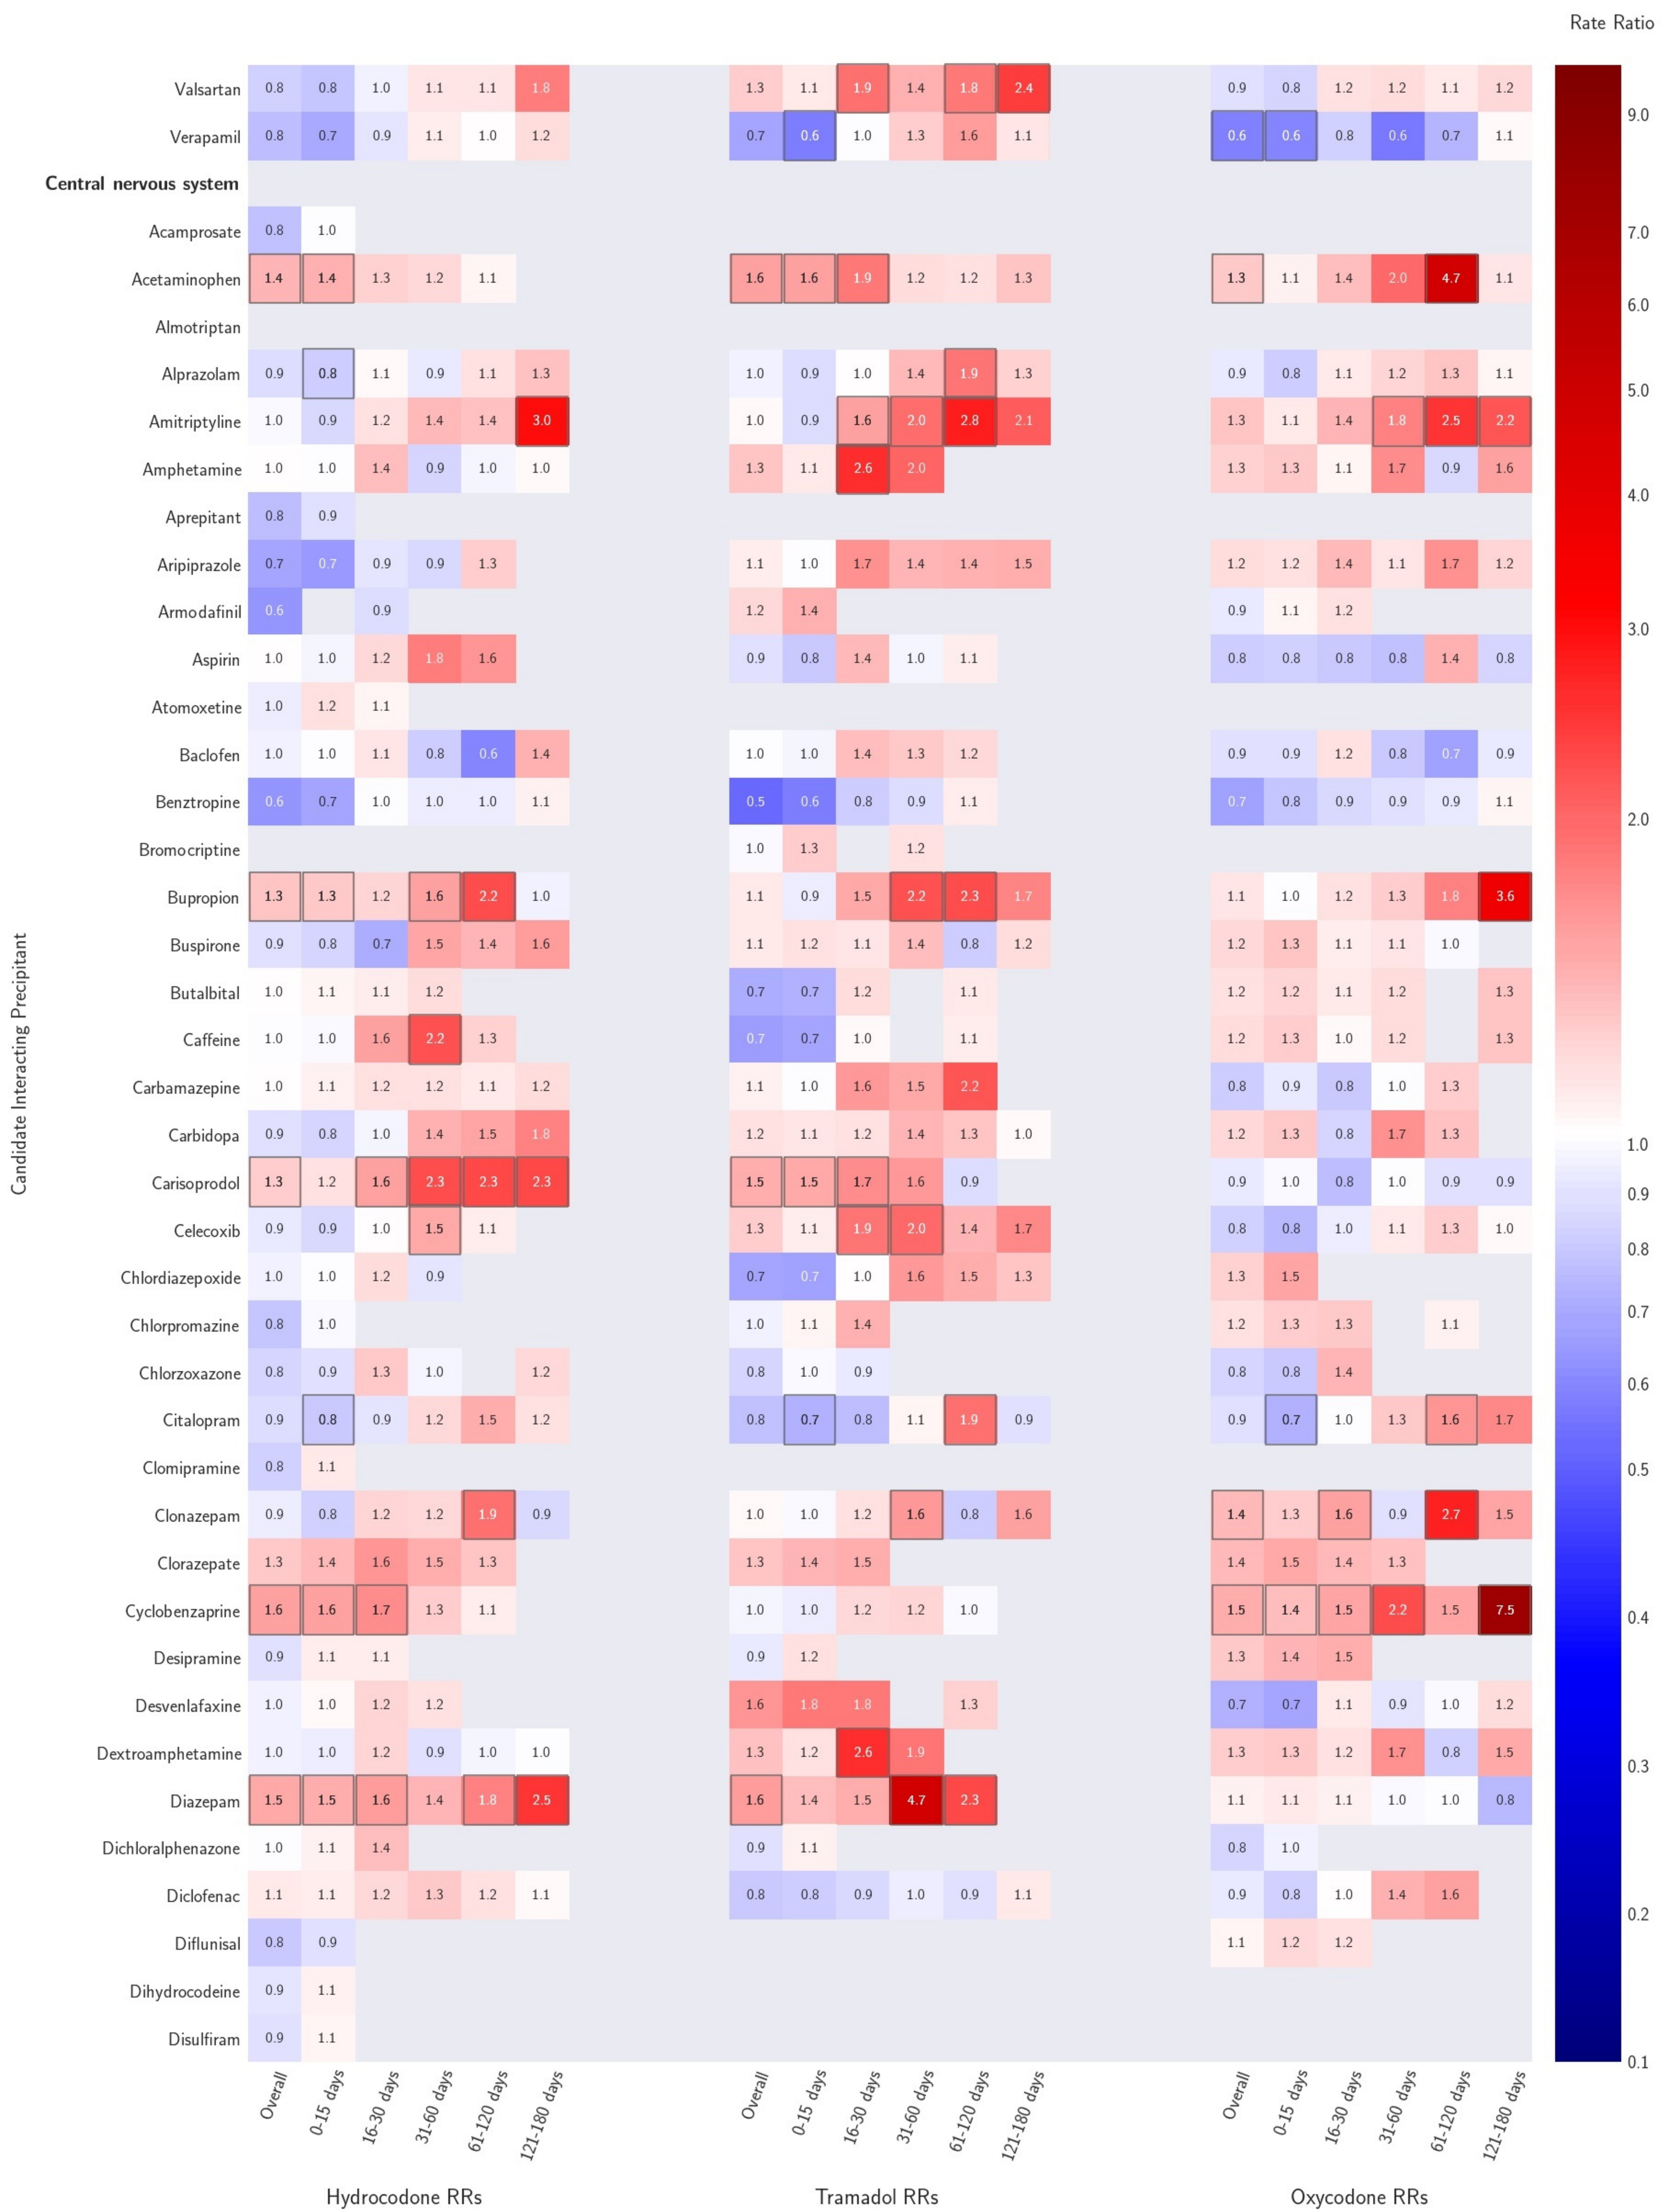

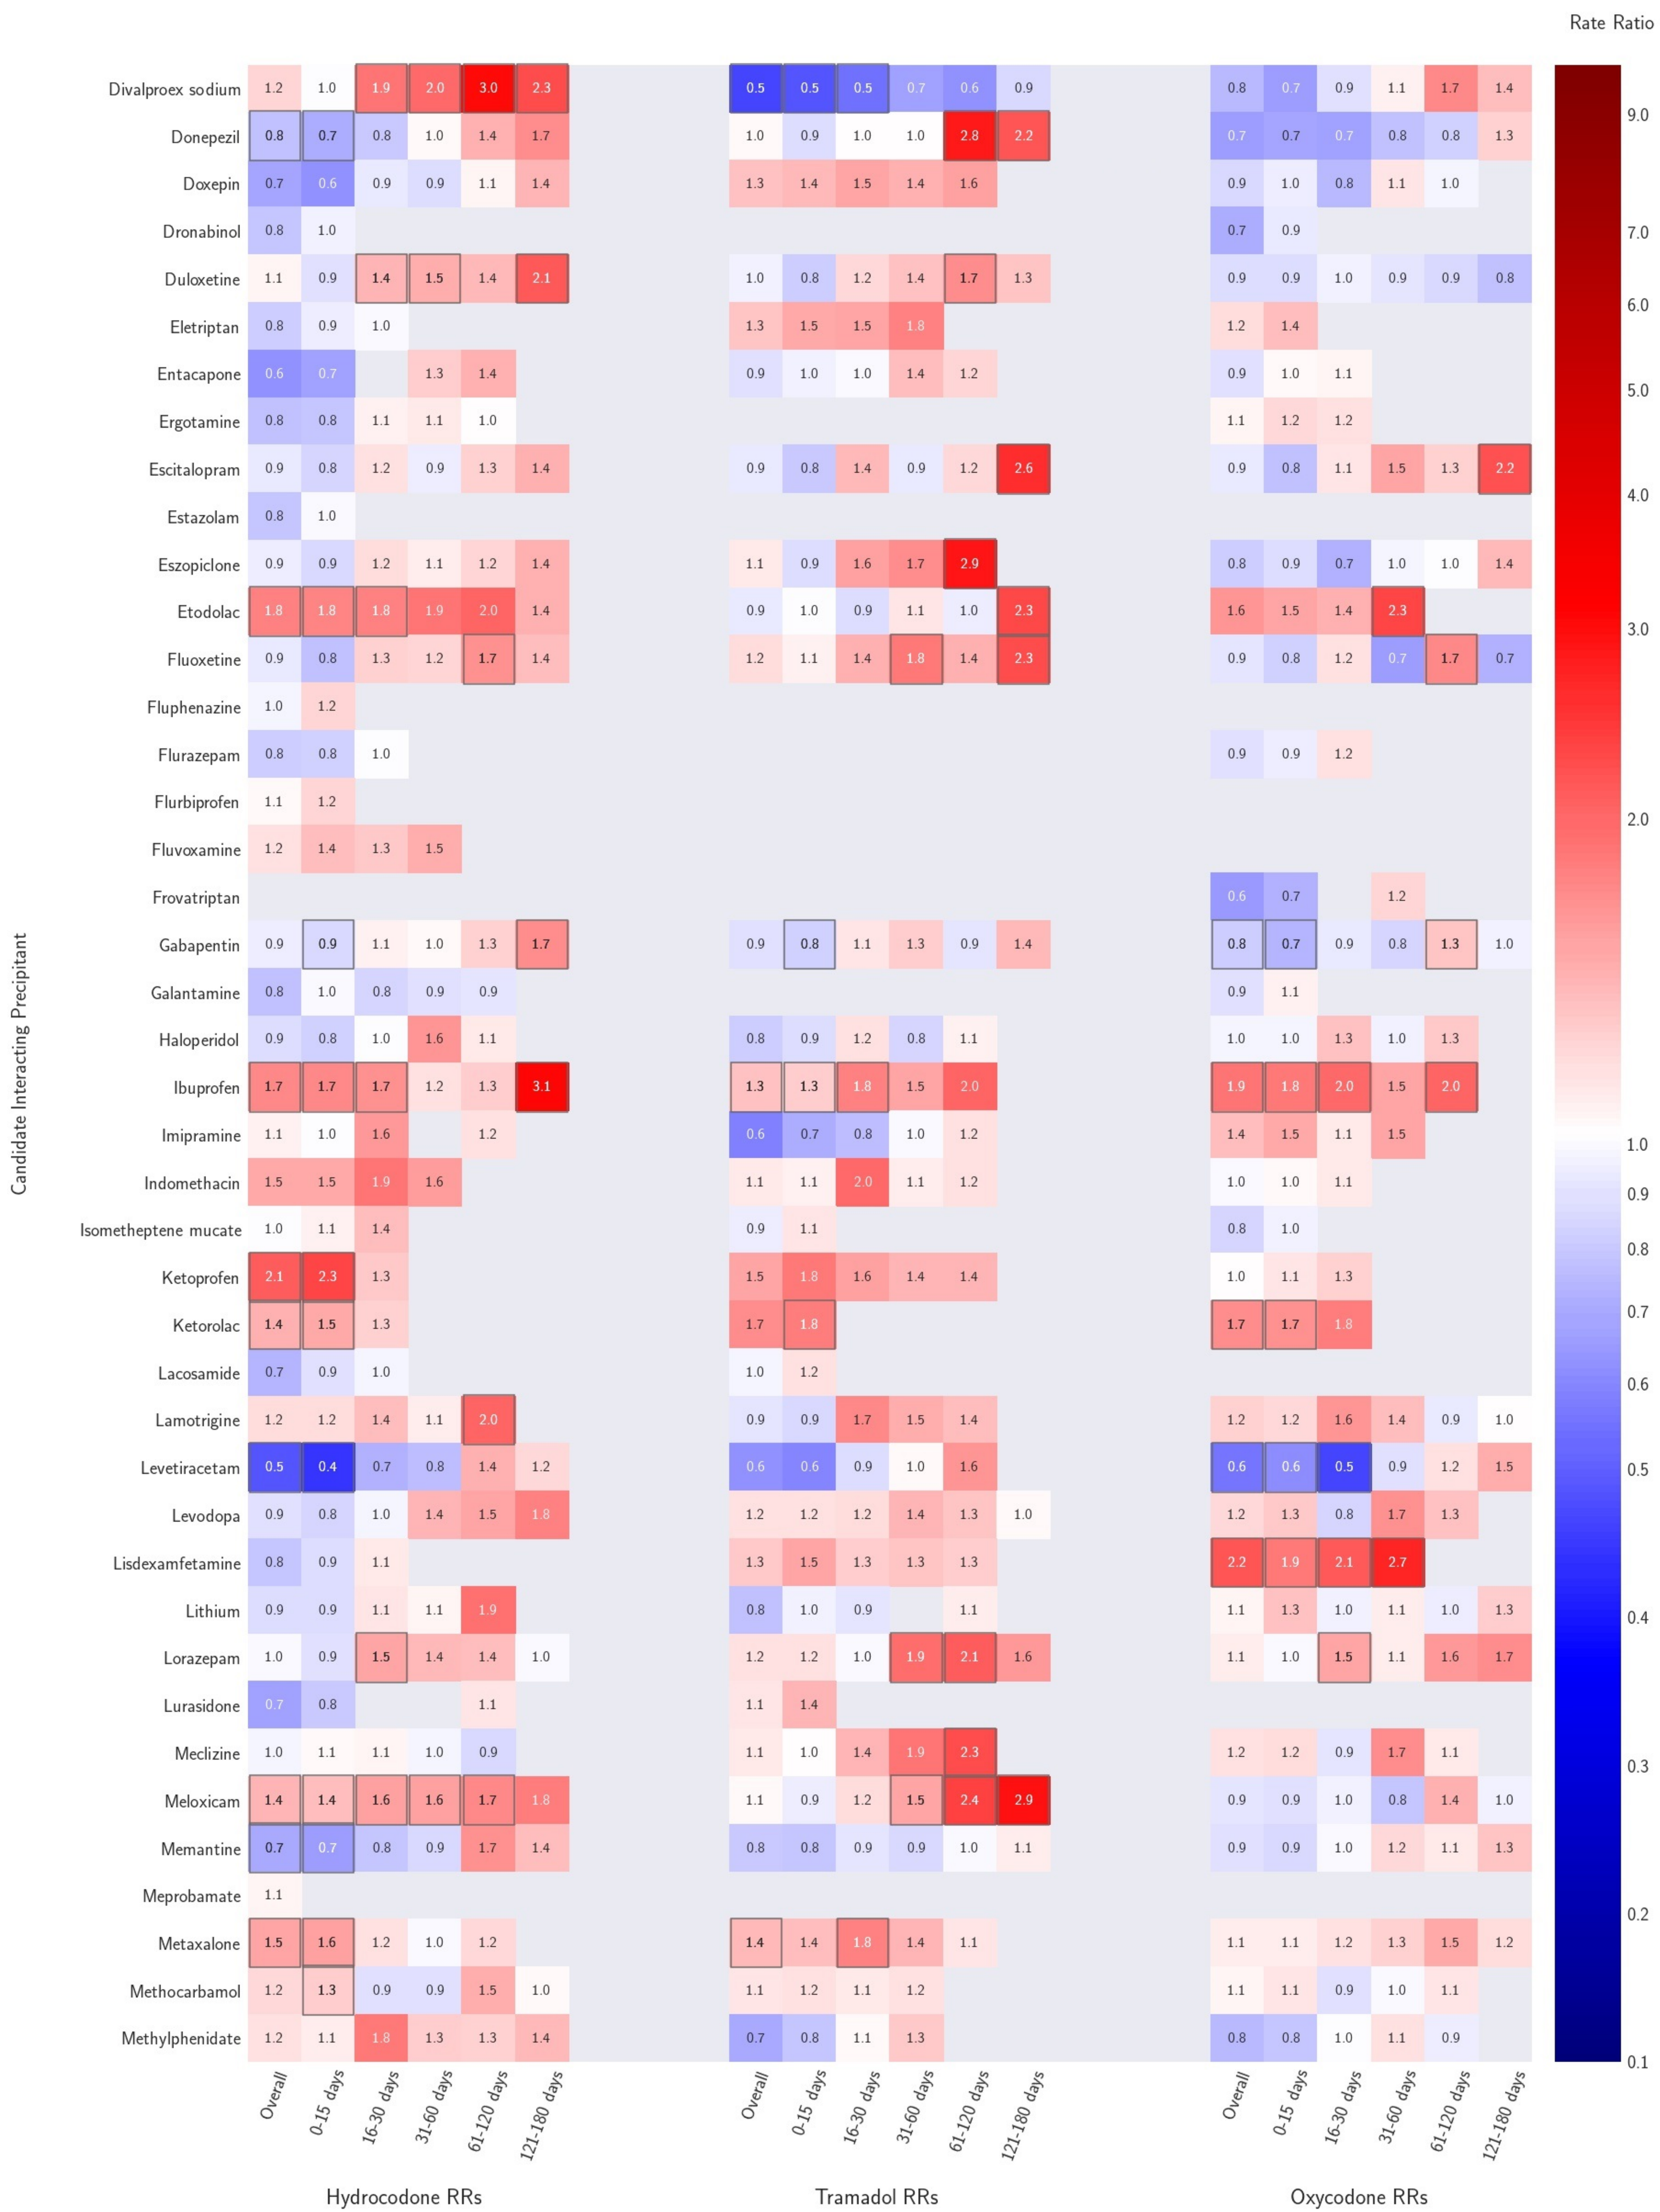

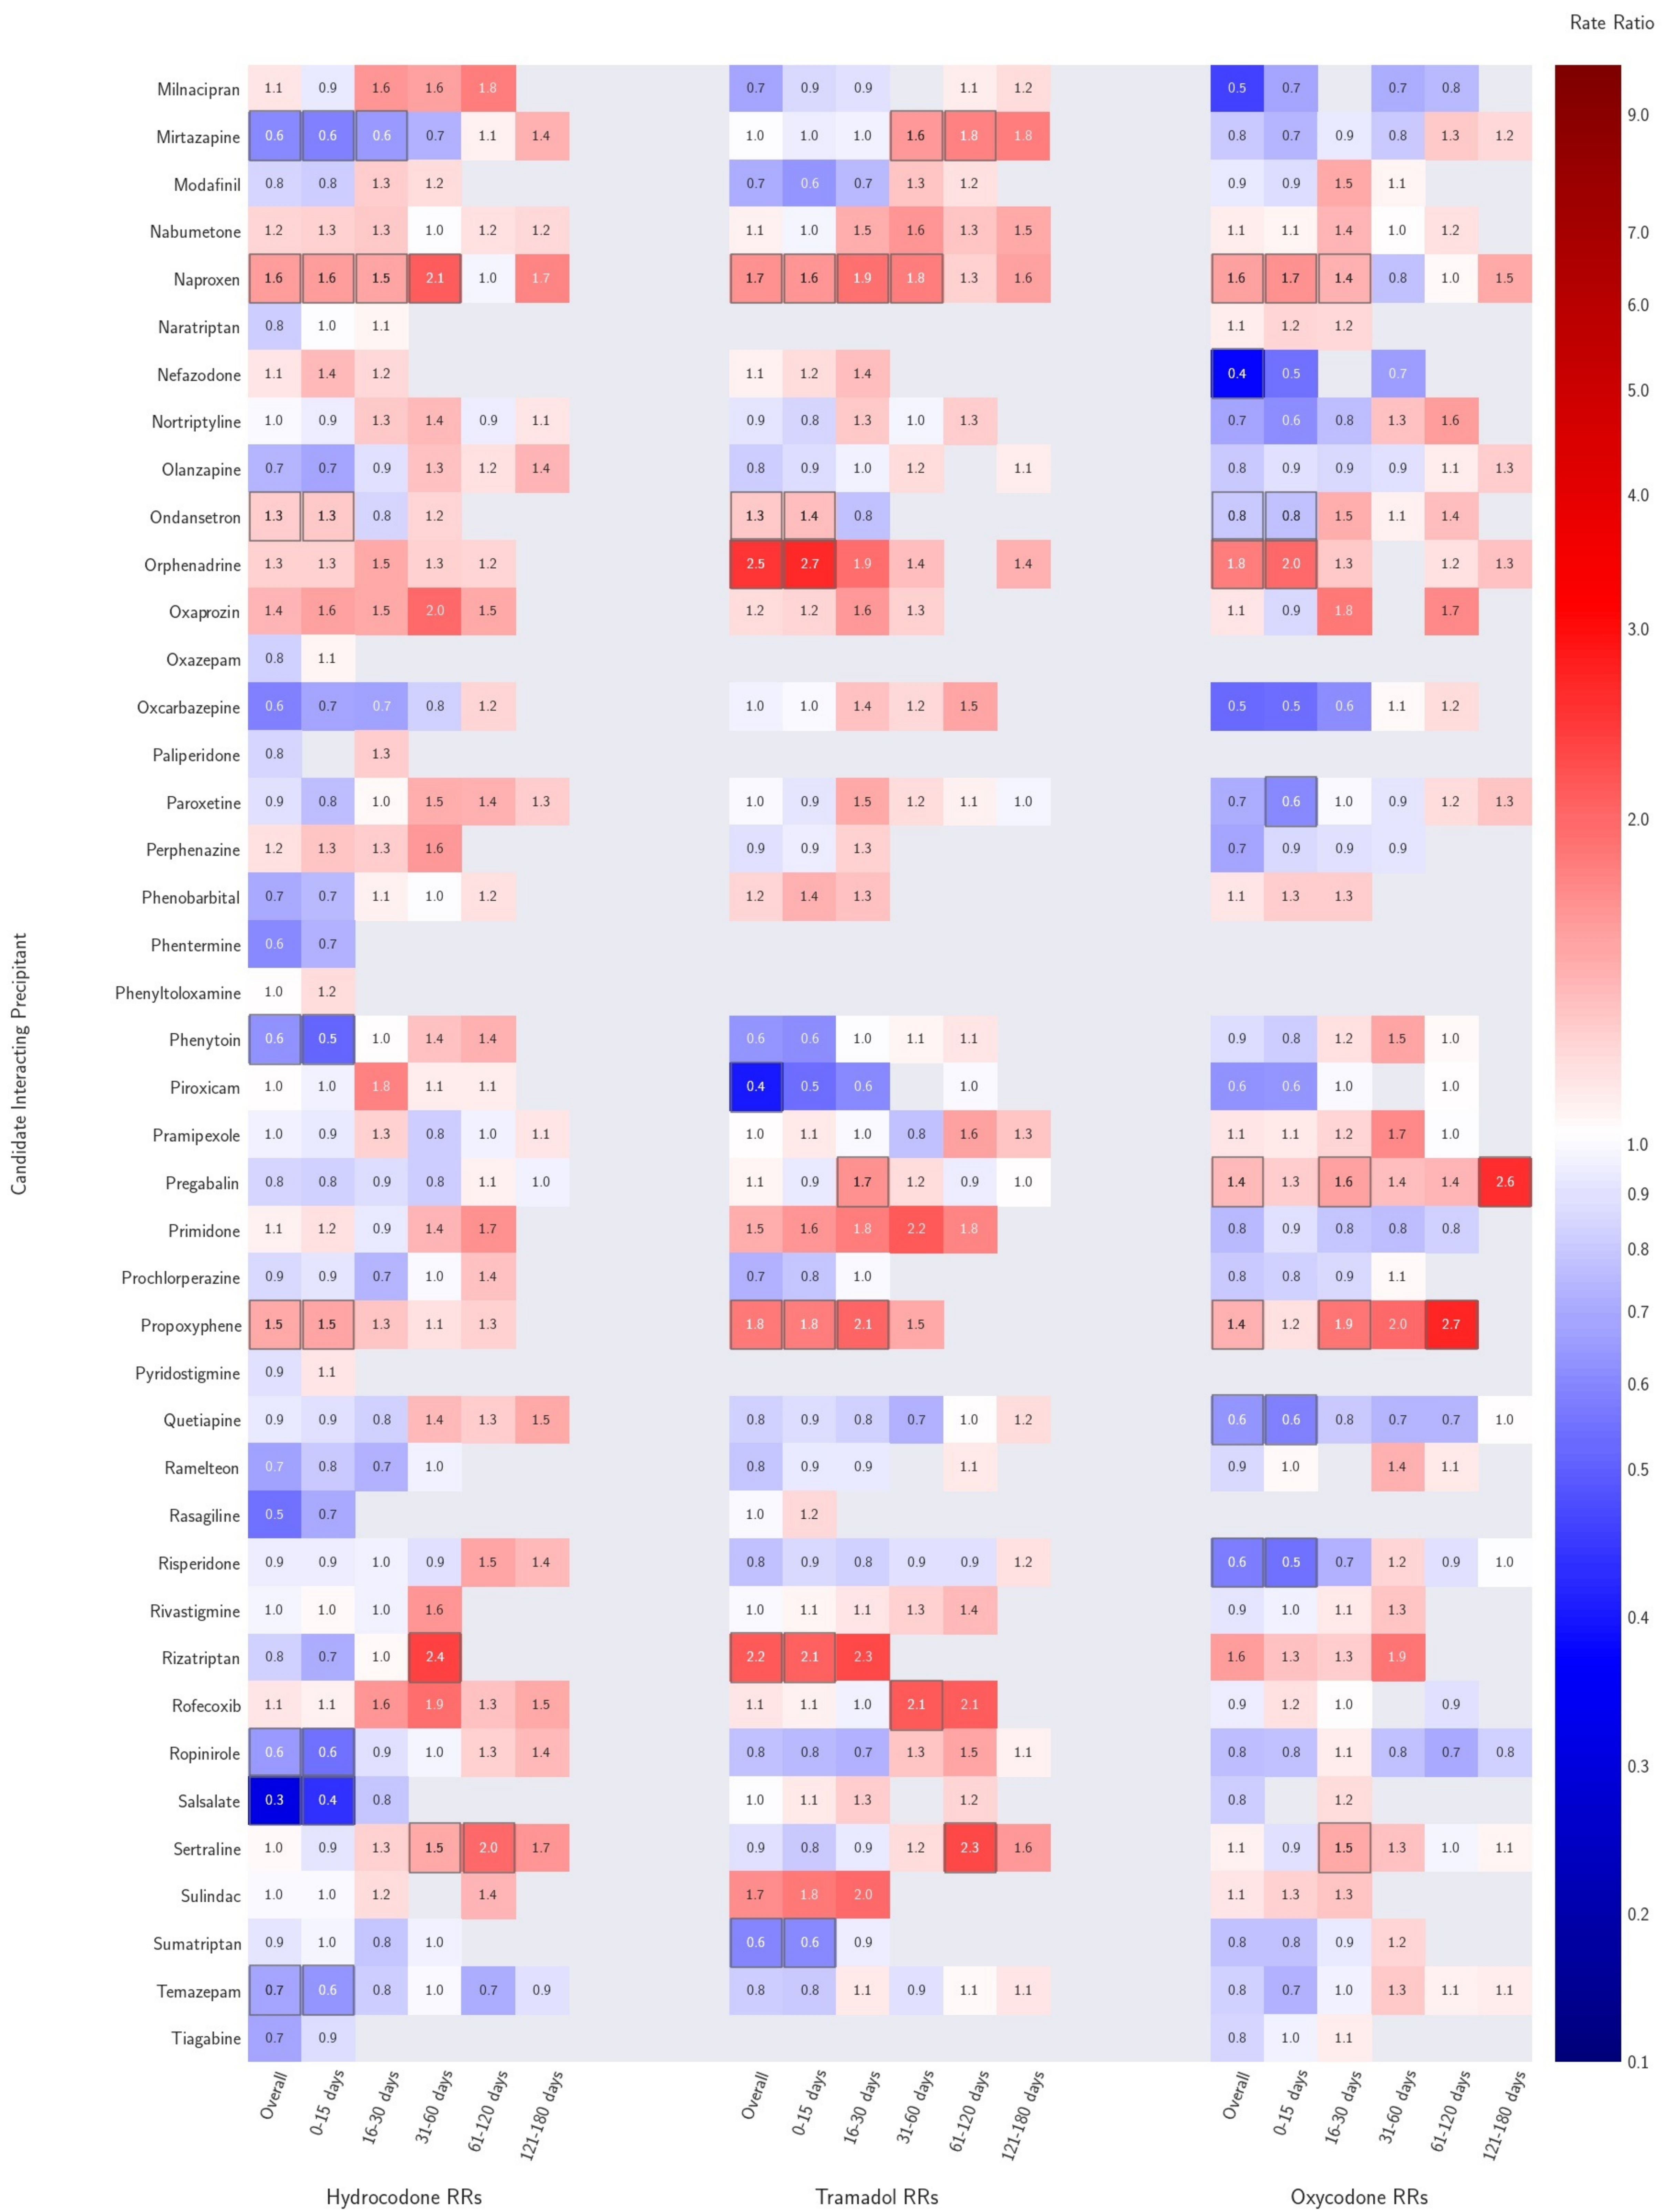

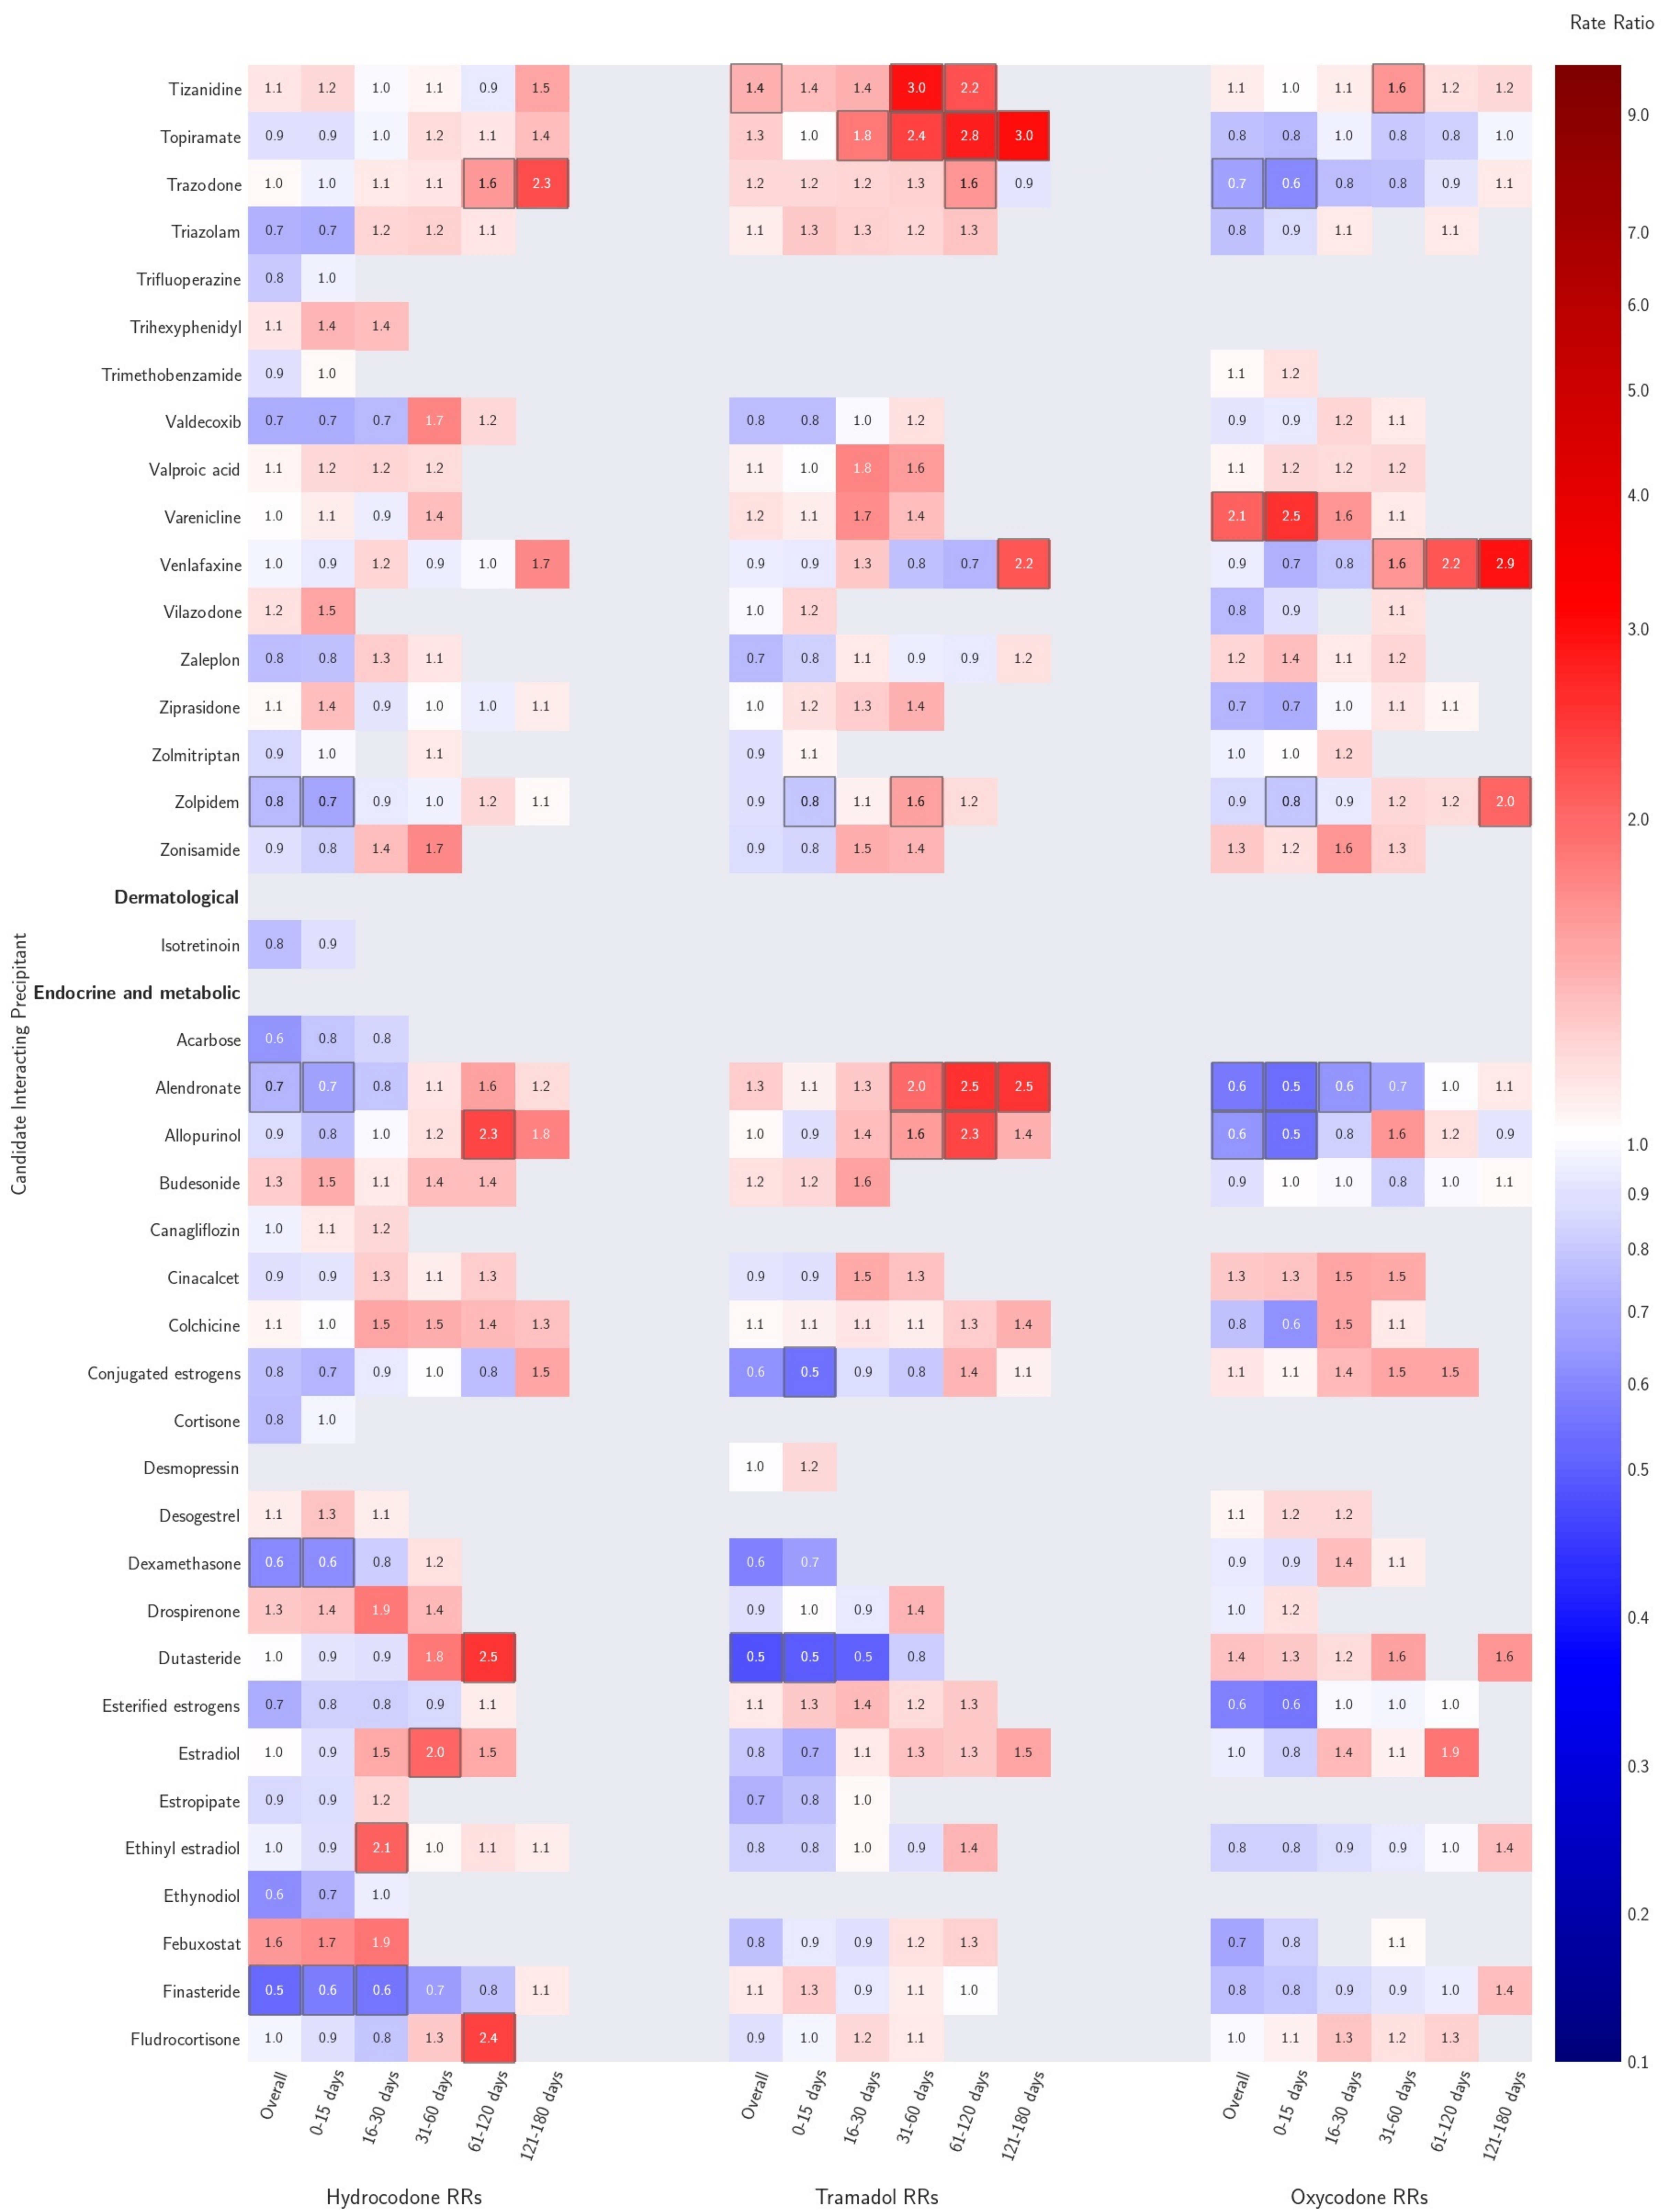



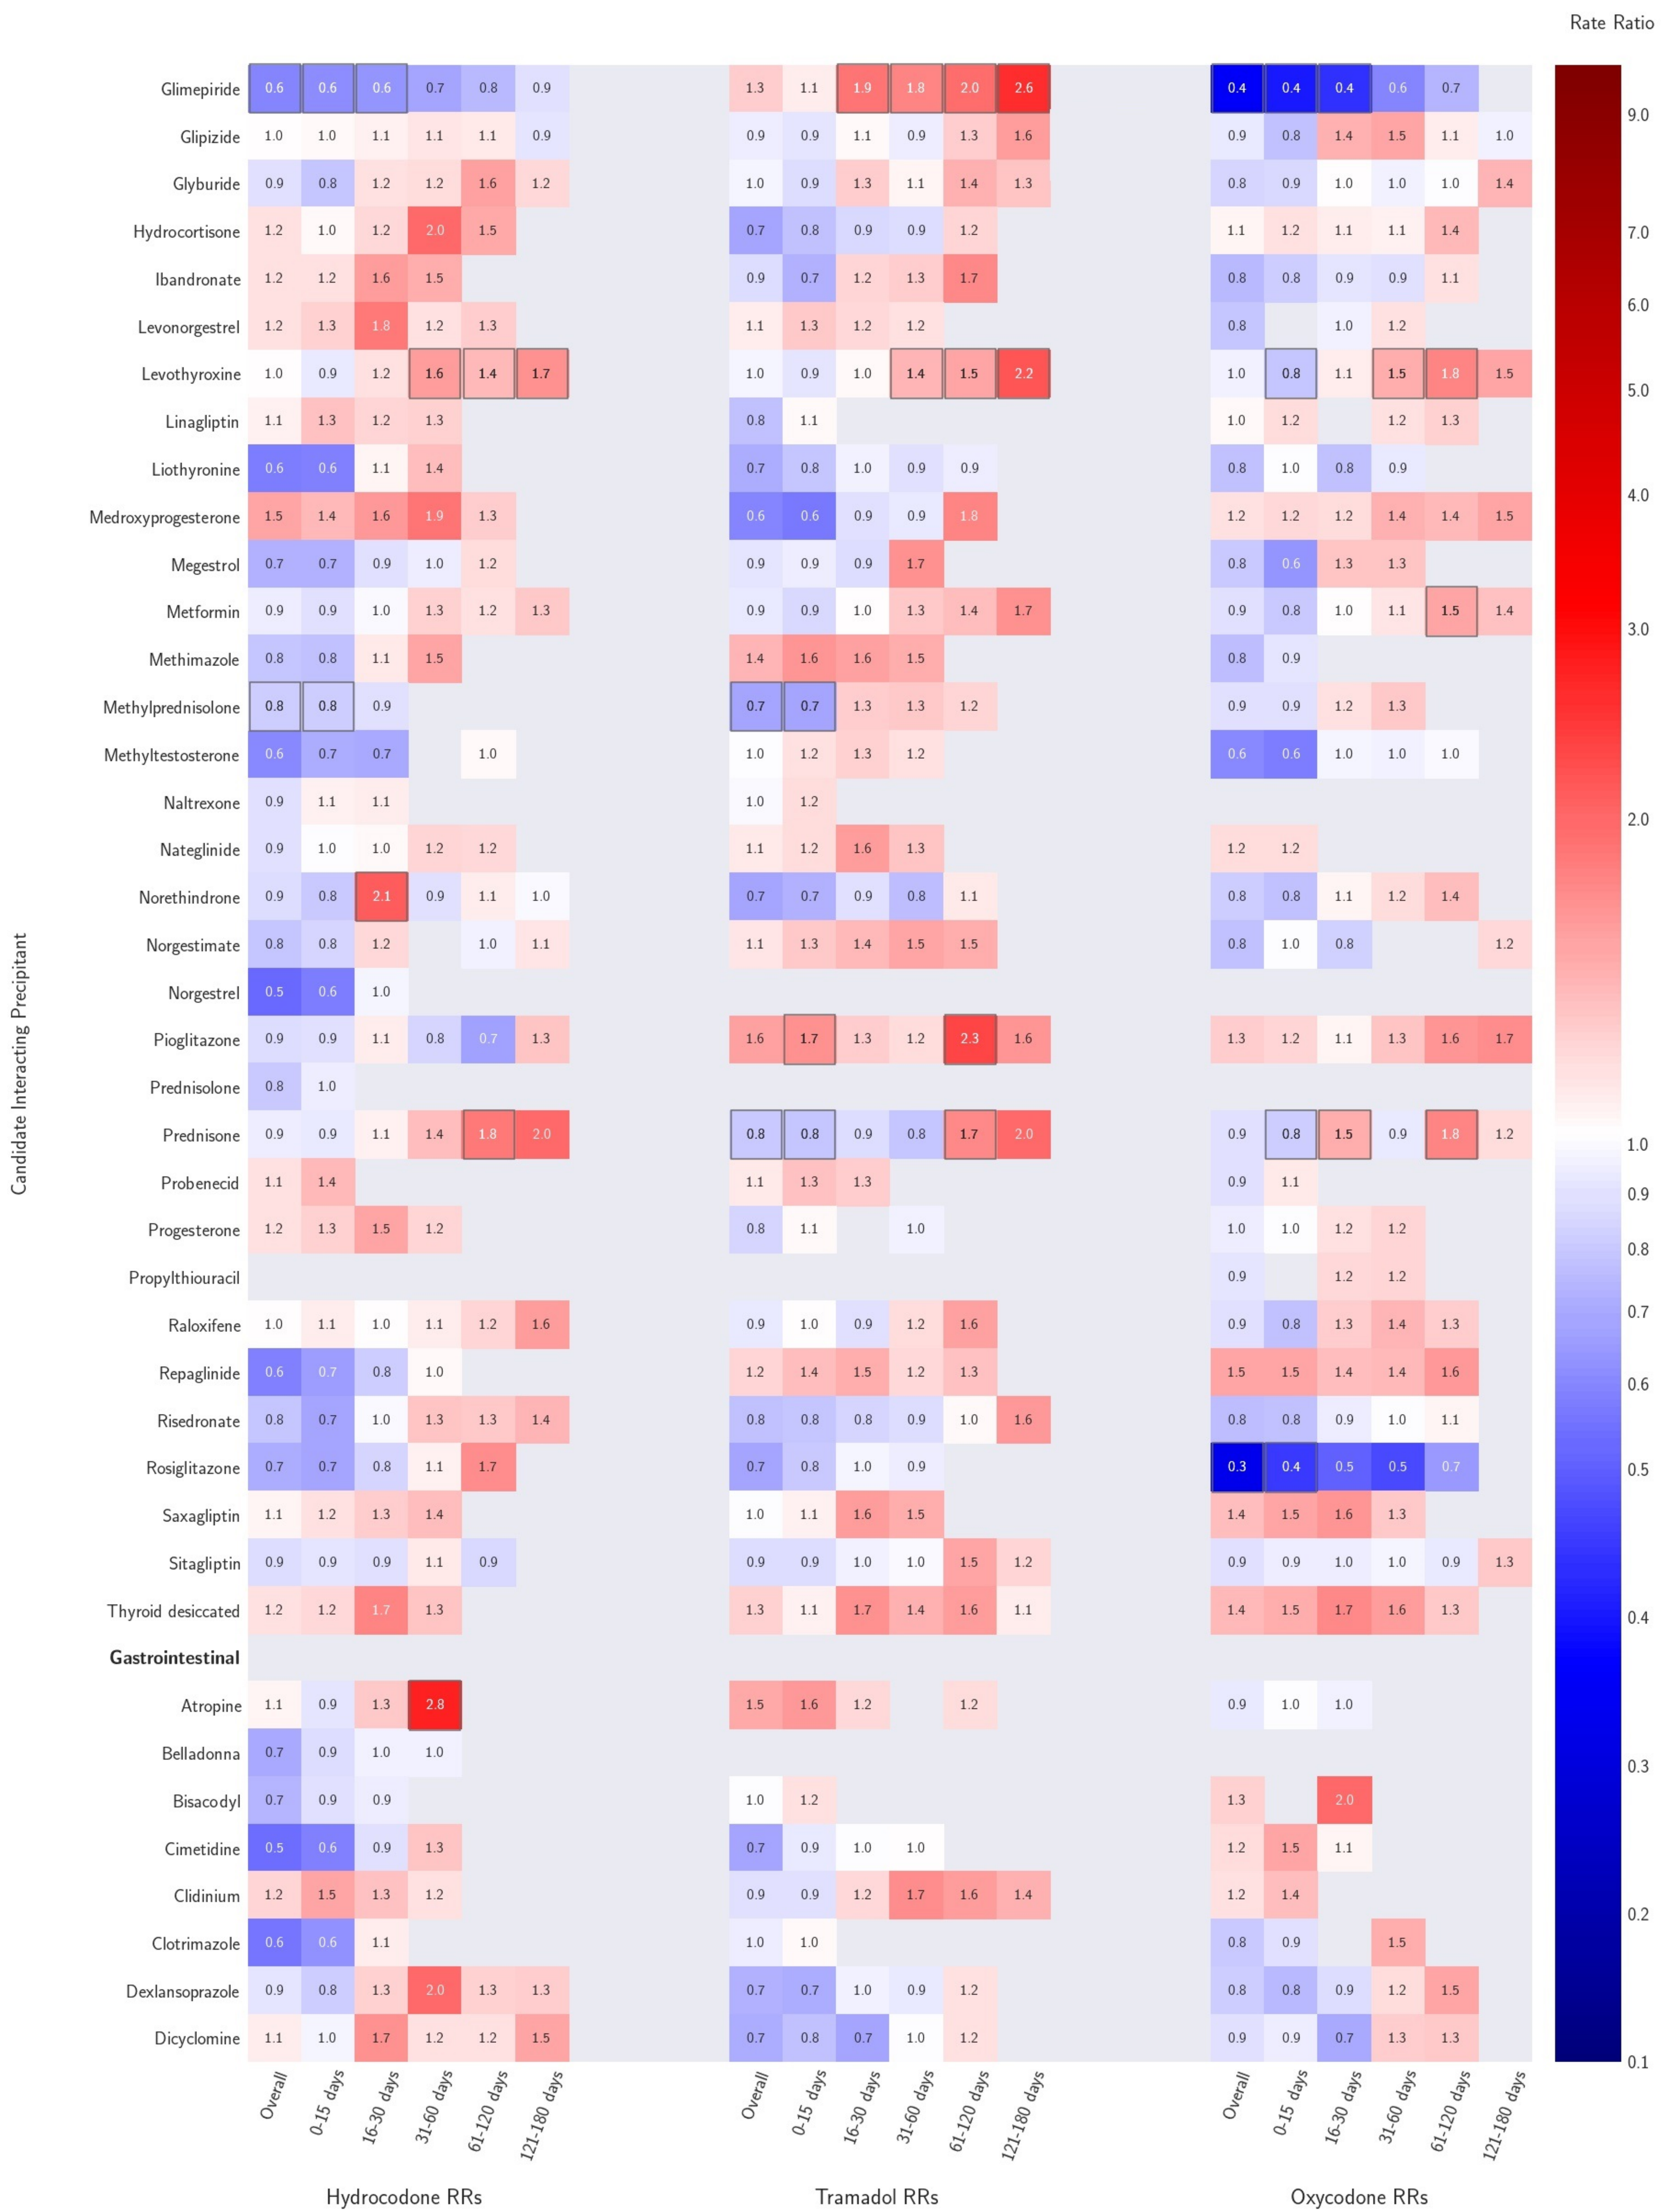



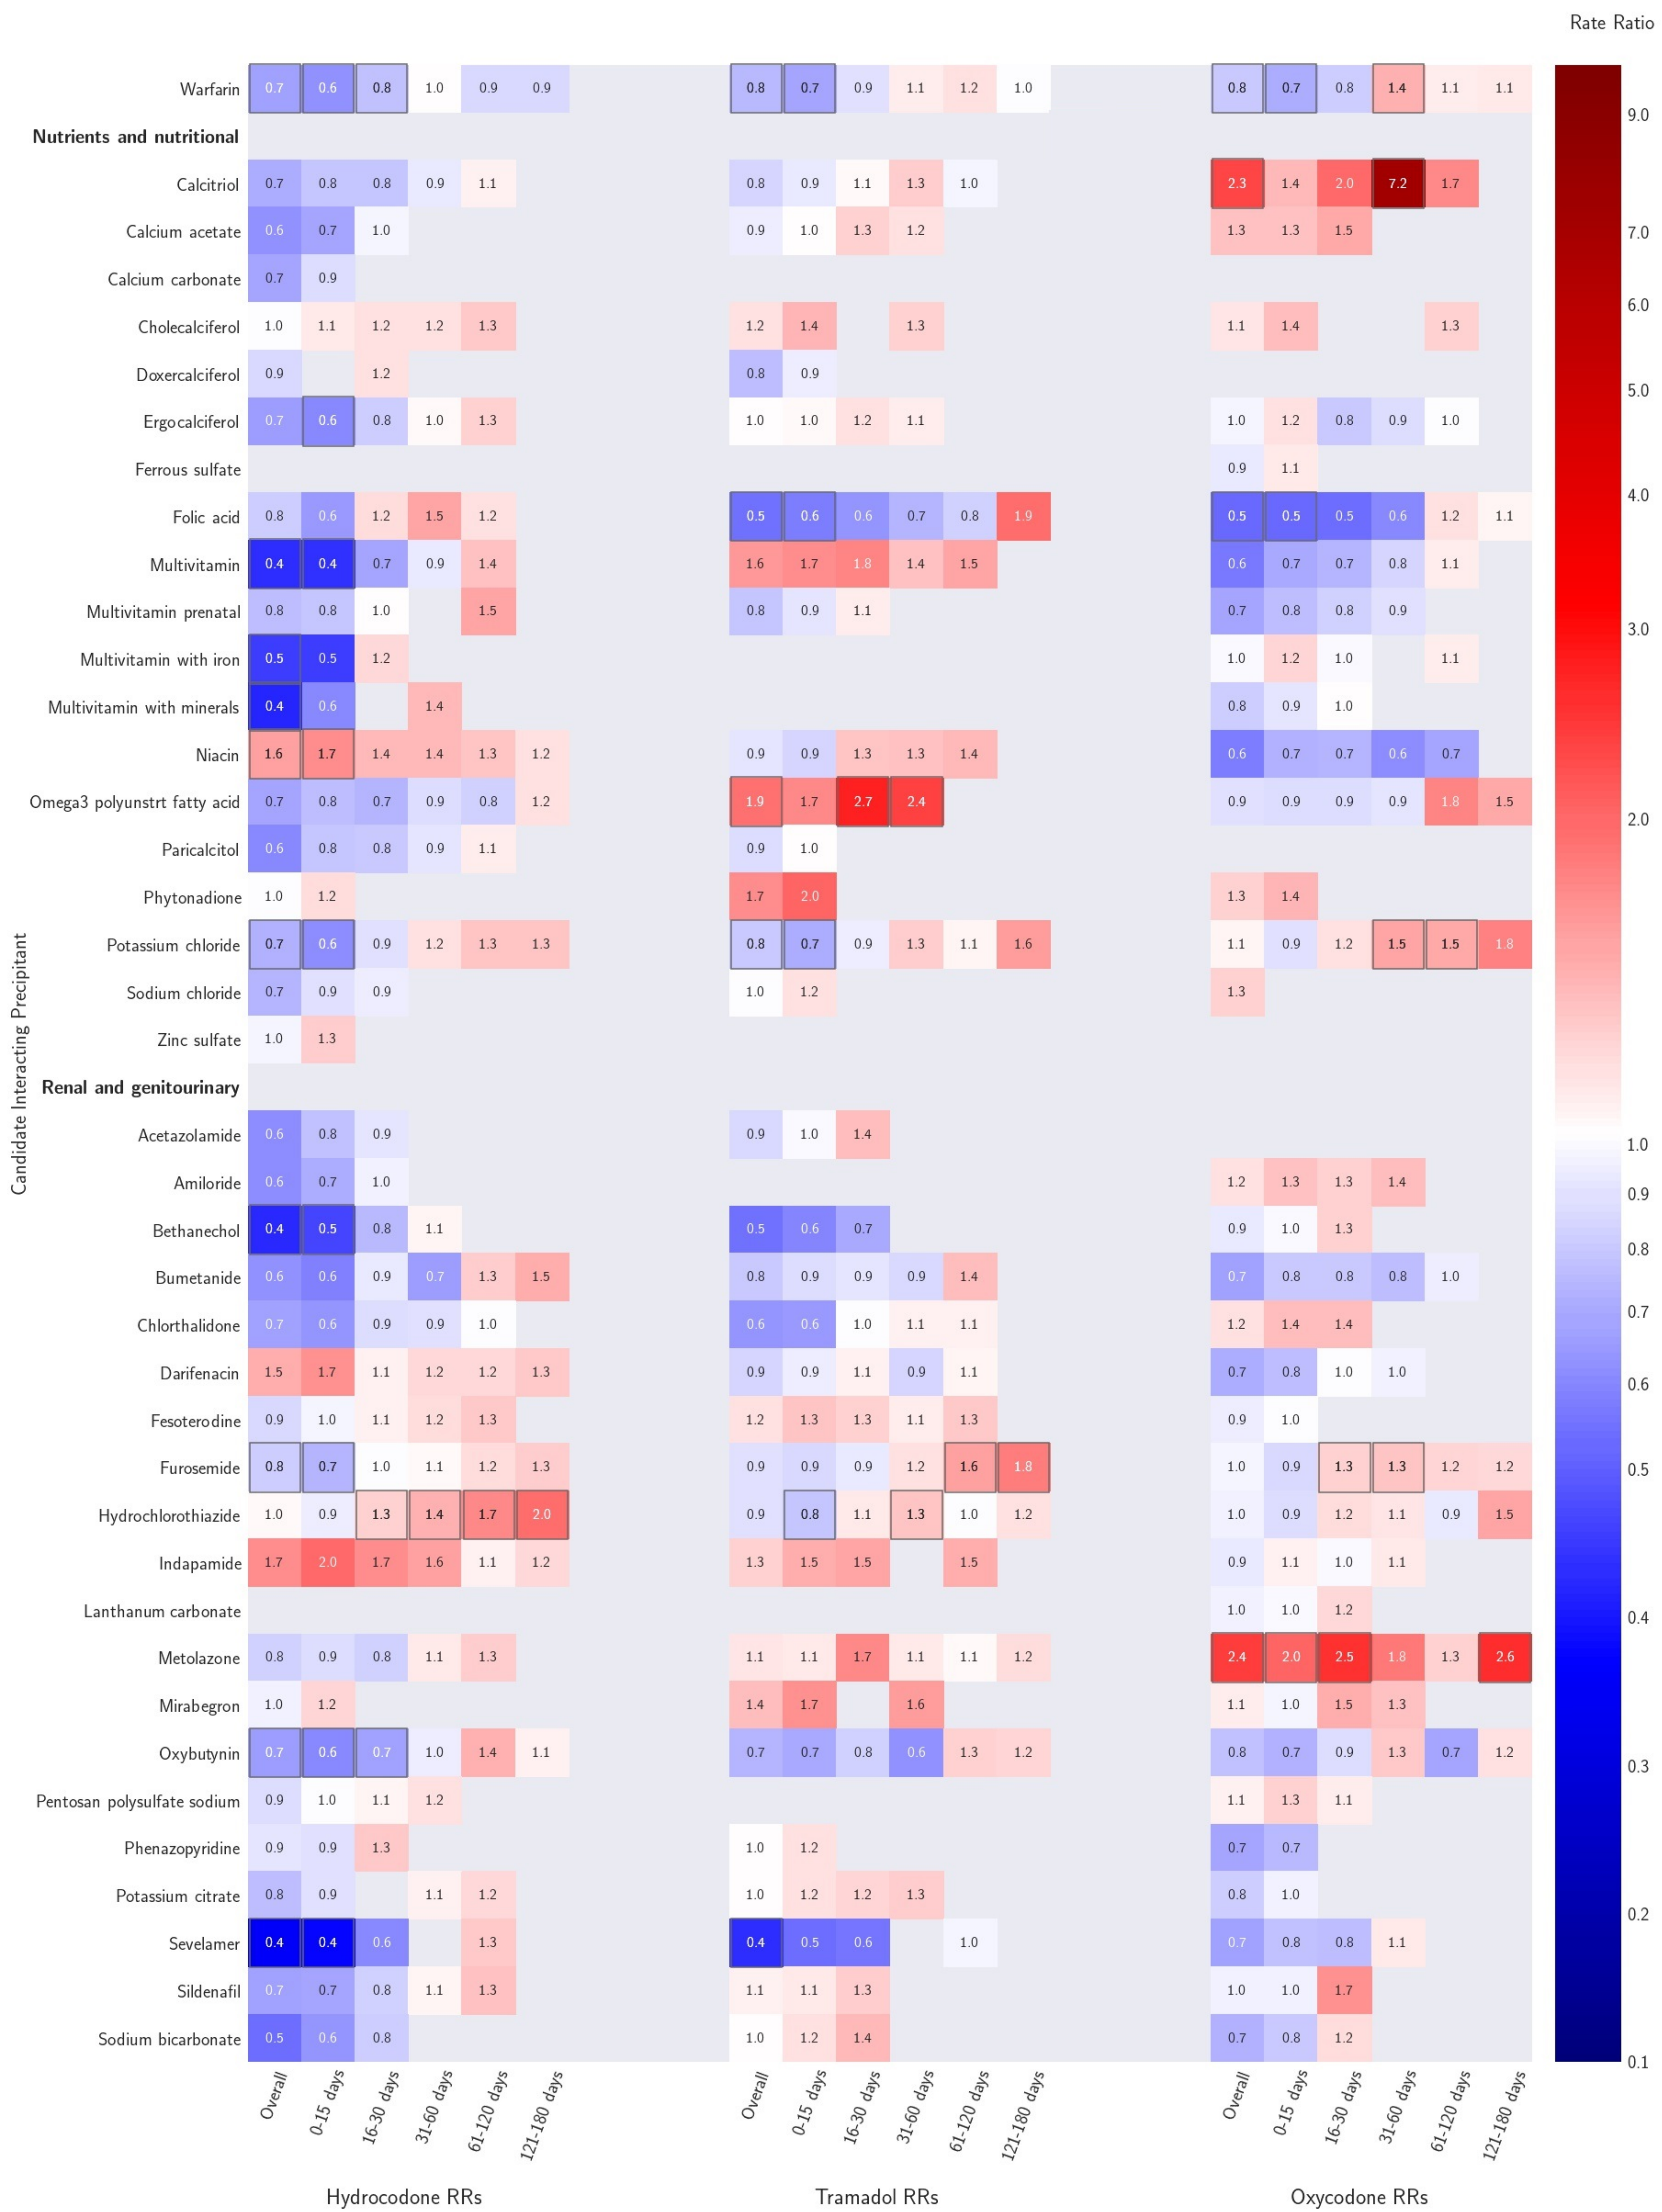

Supplement: NIHMS1618269-supplement-1.pdf [file NIHMS1618269-supplement-1.pdf]

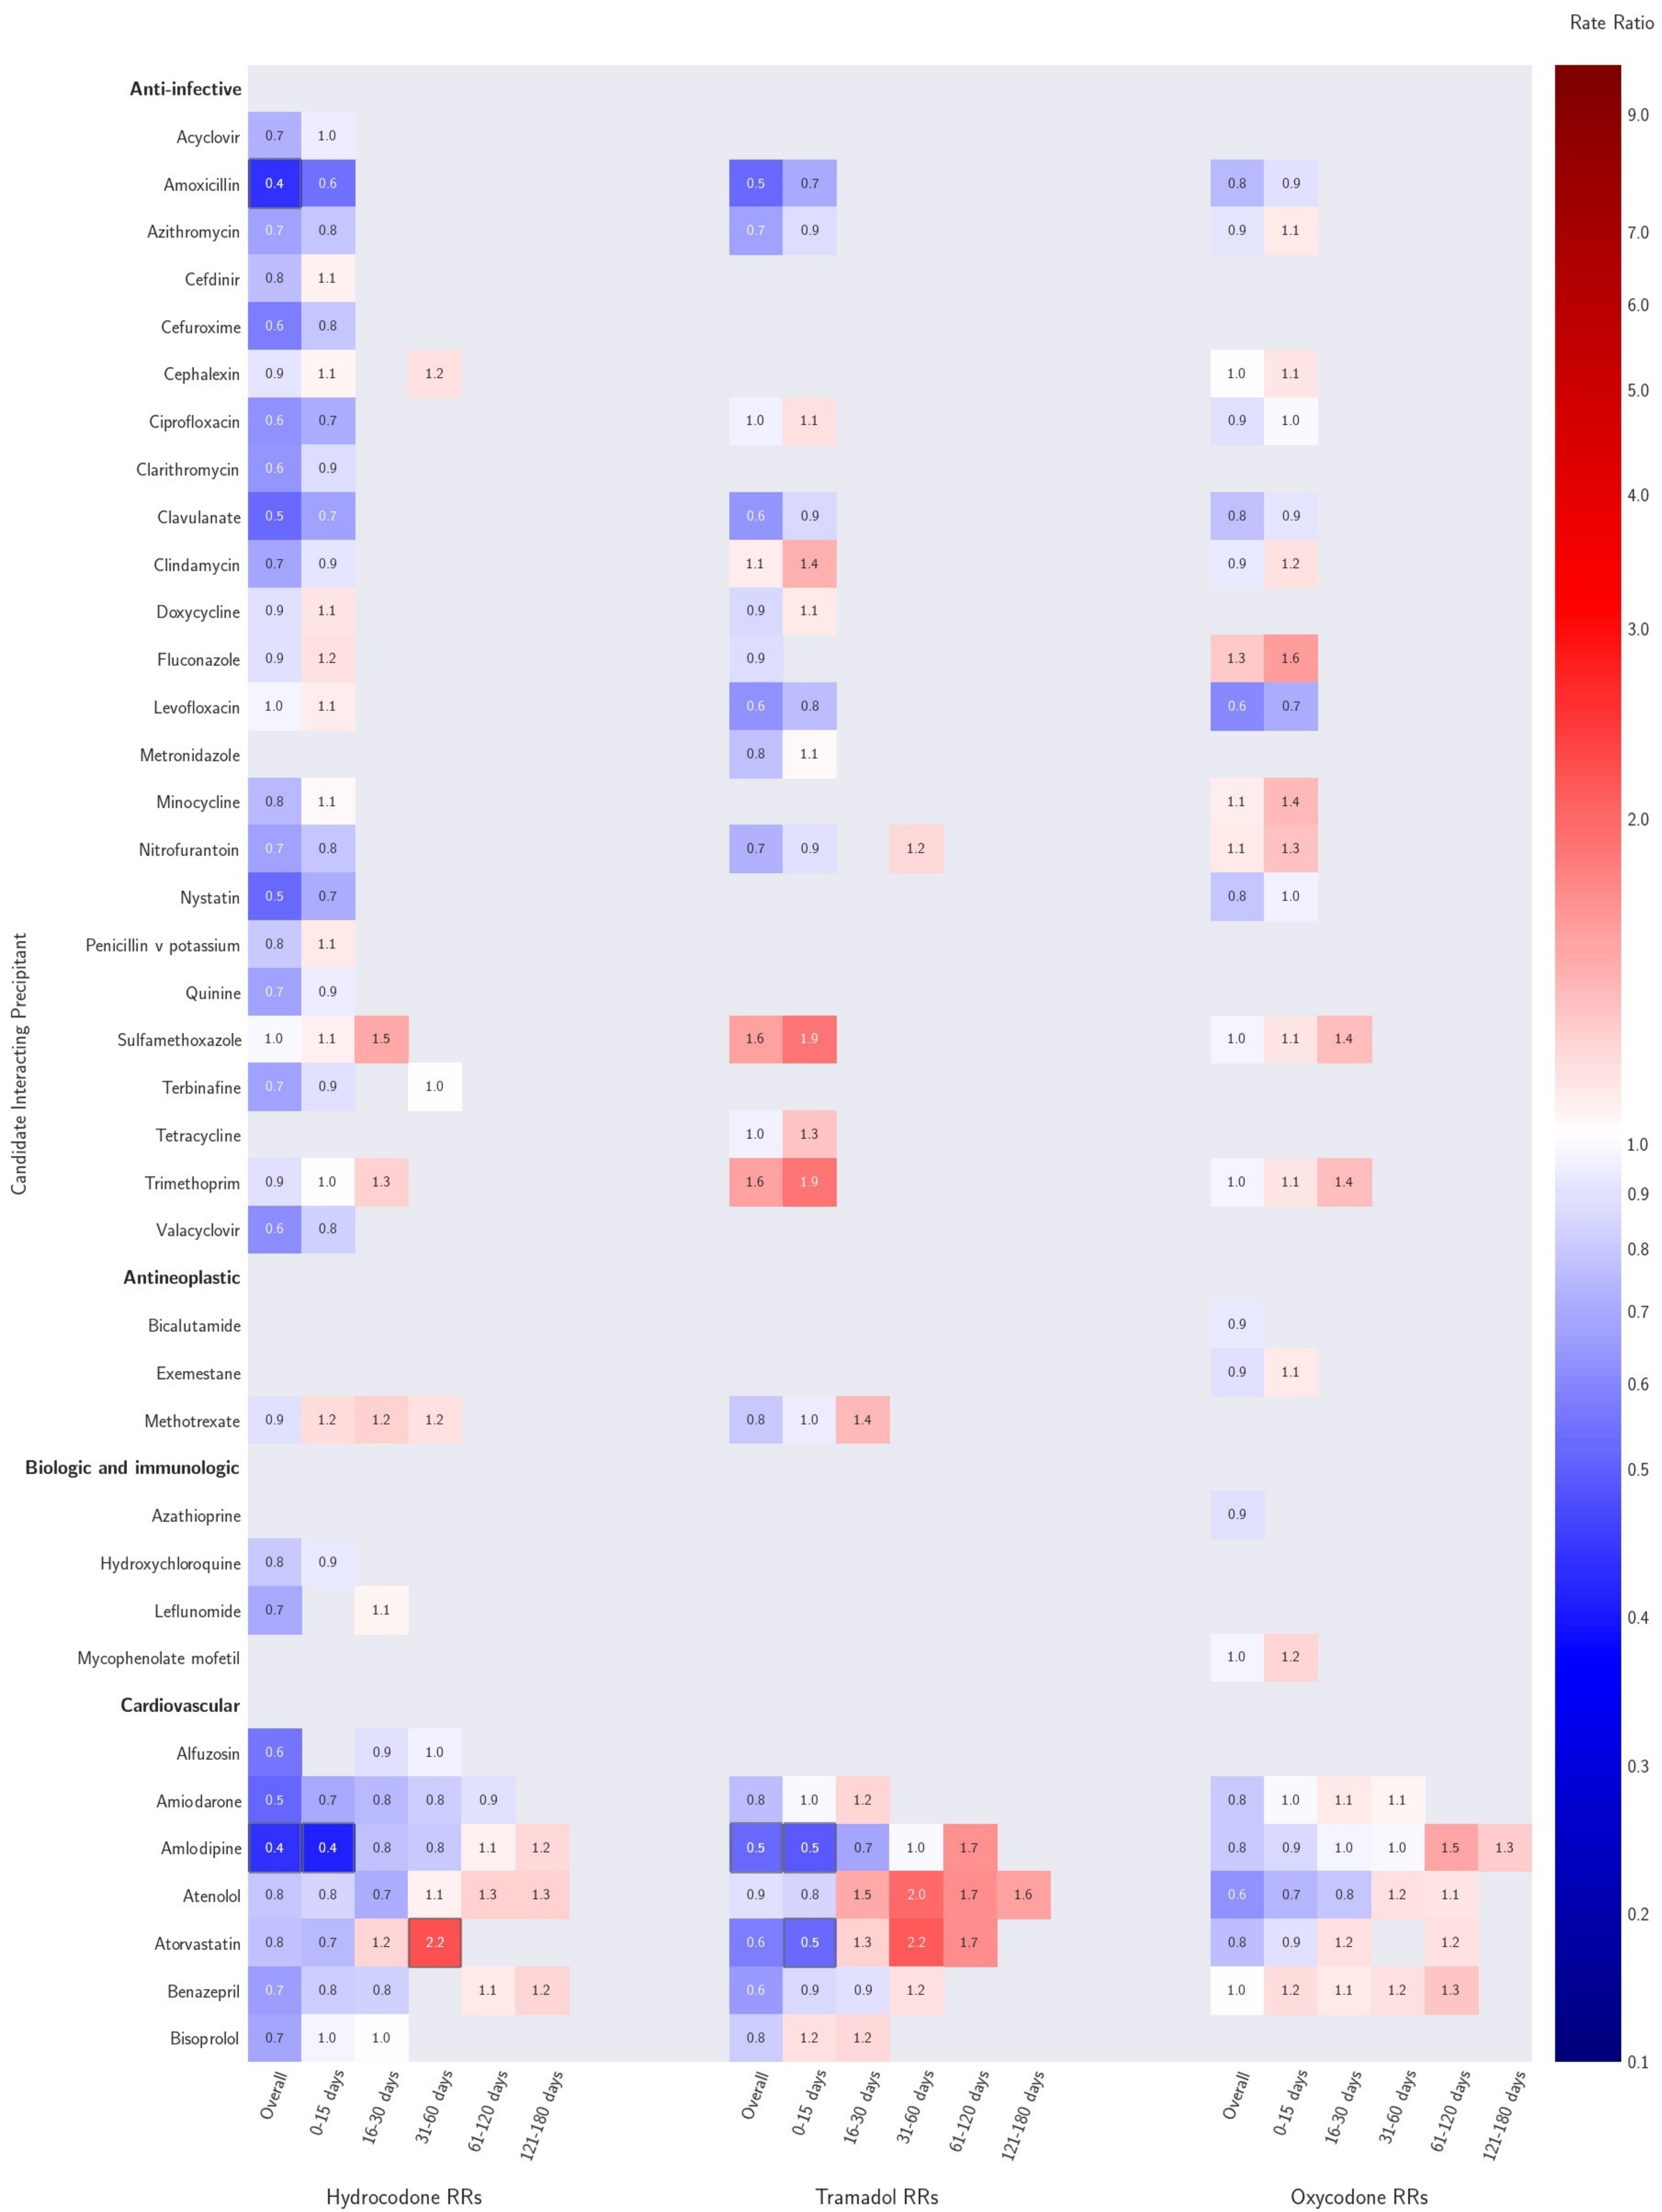

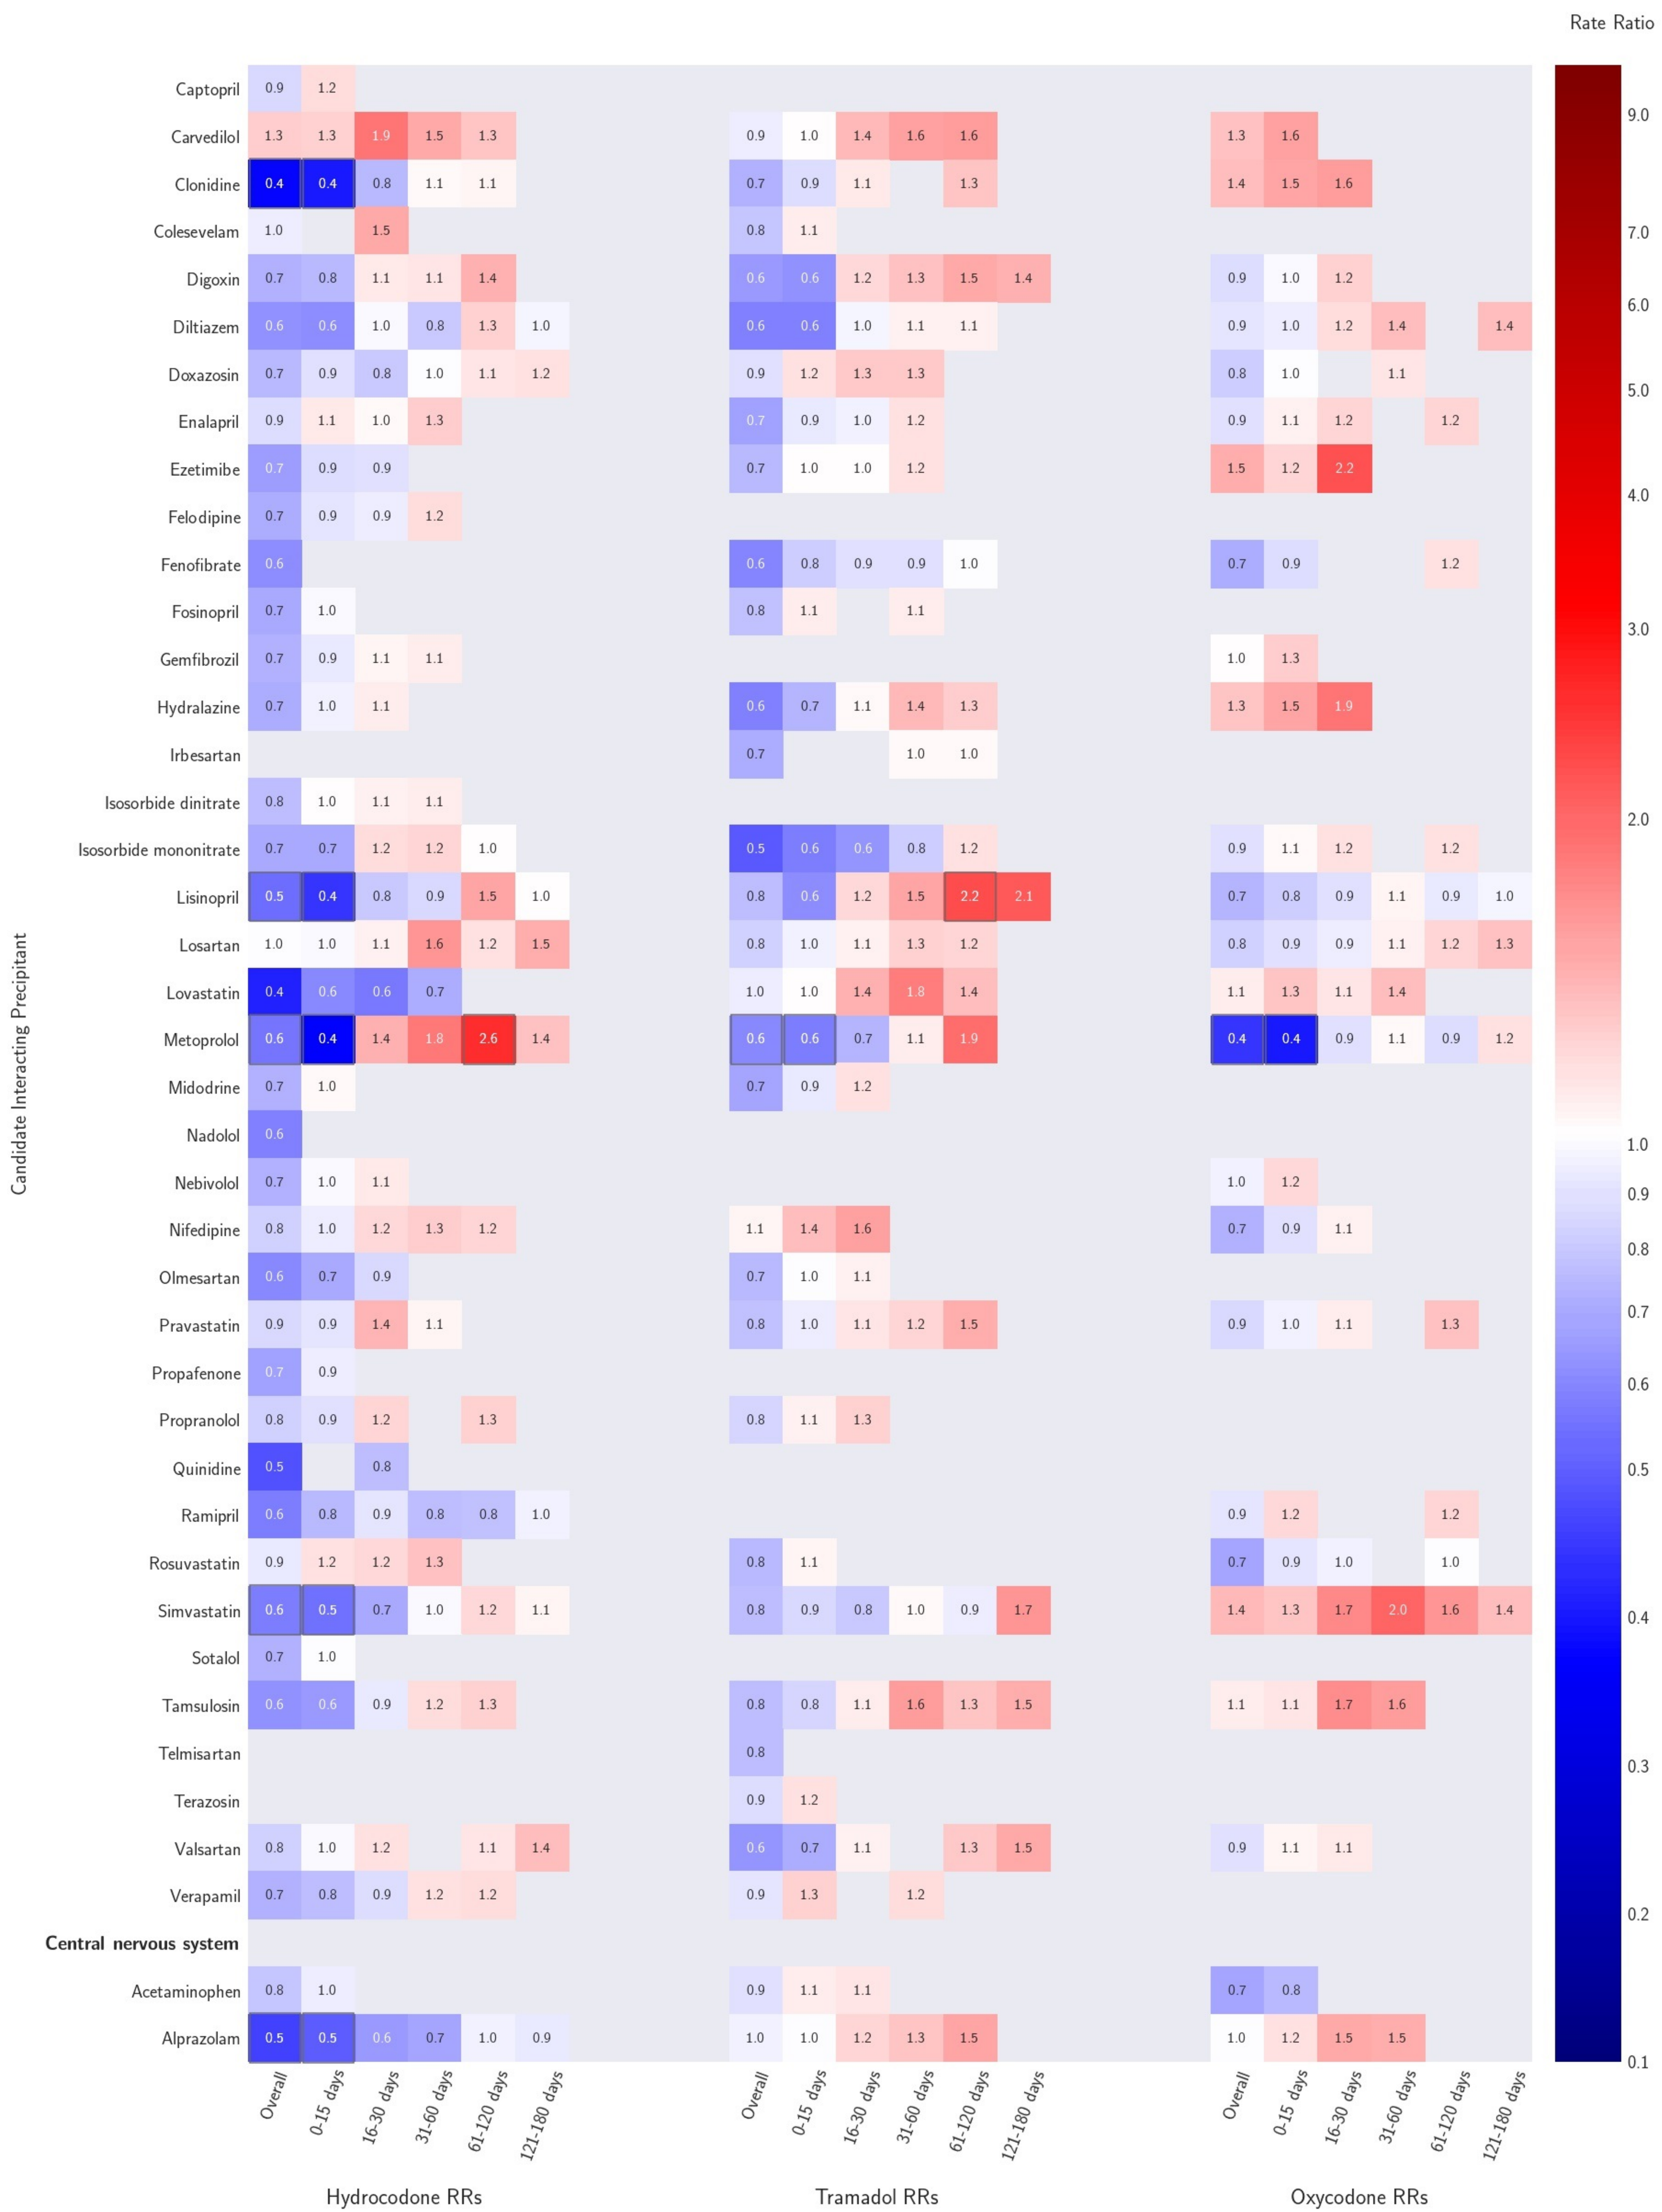

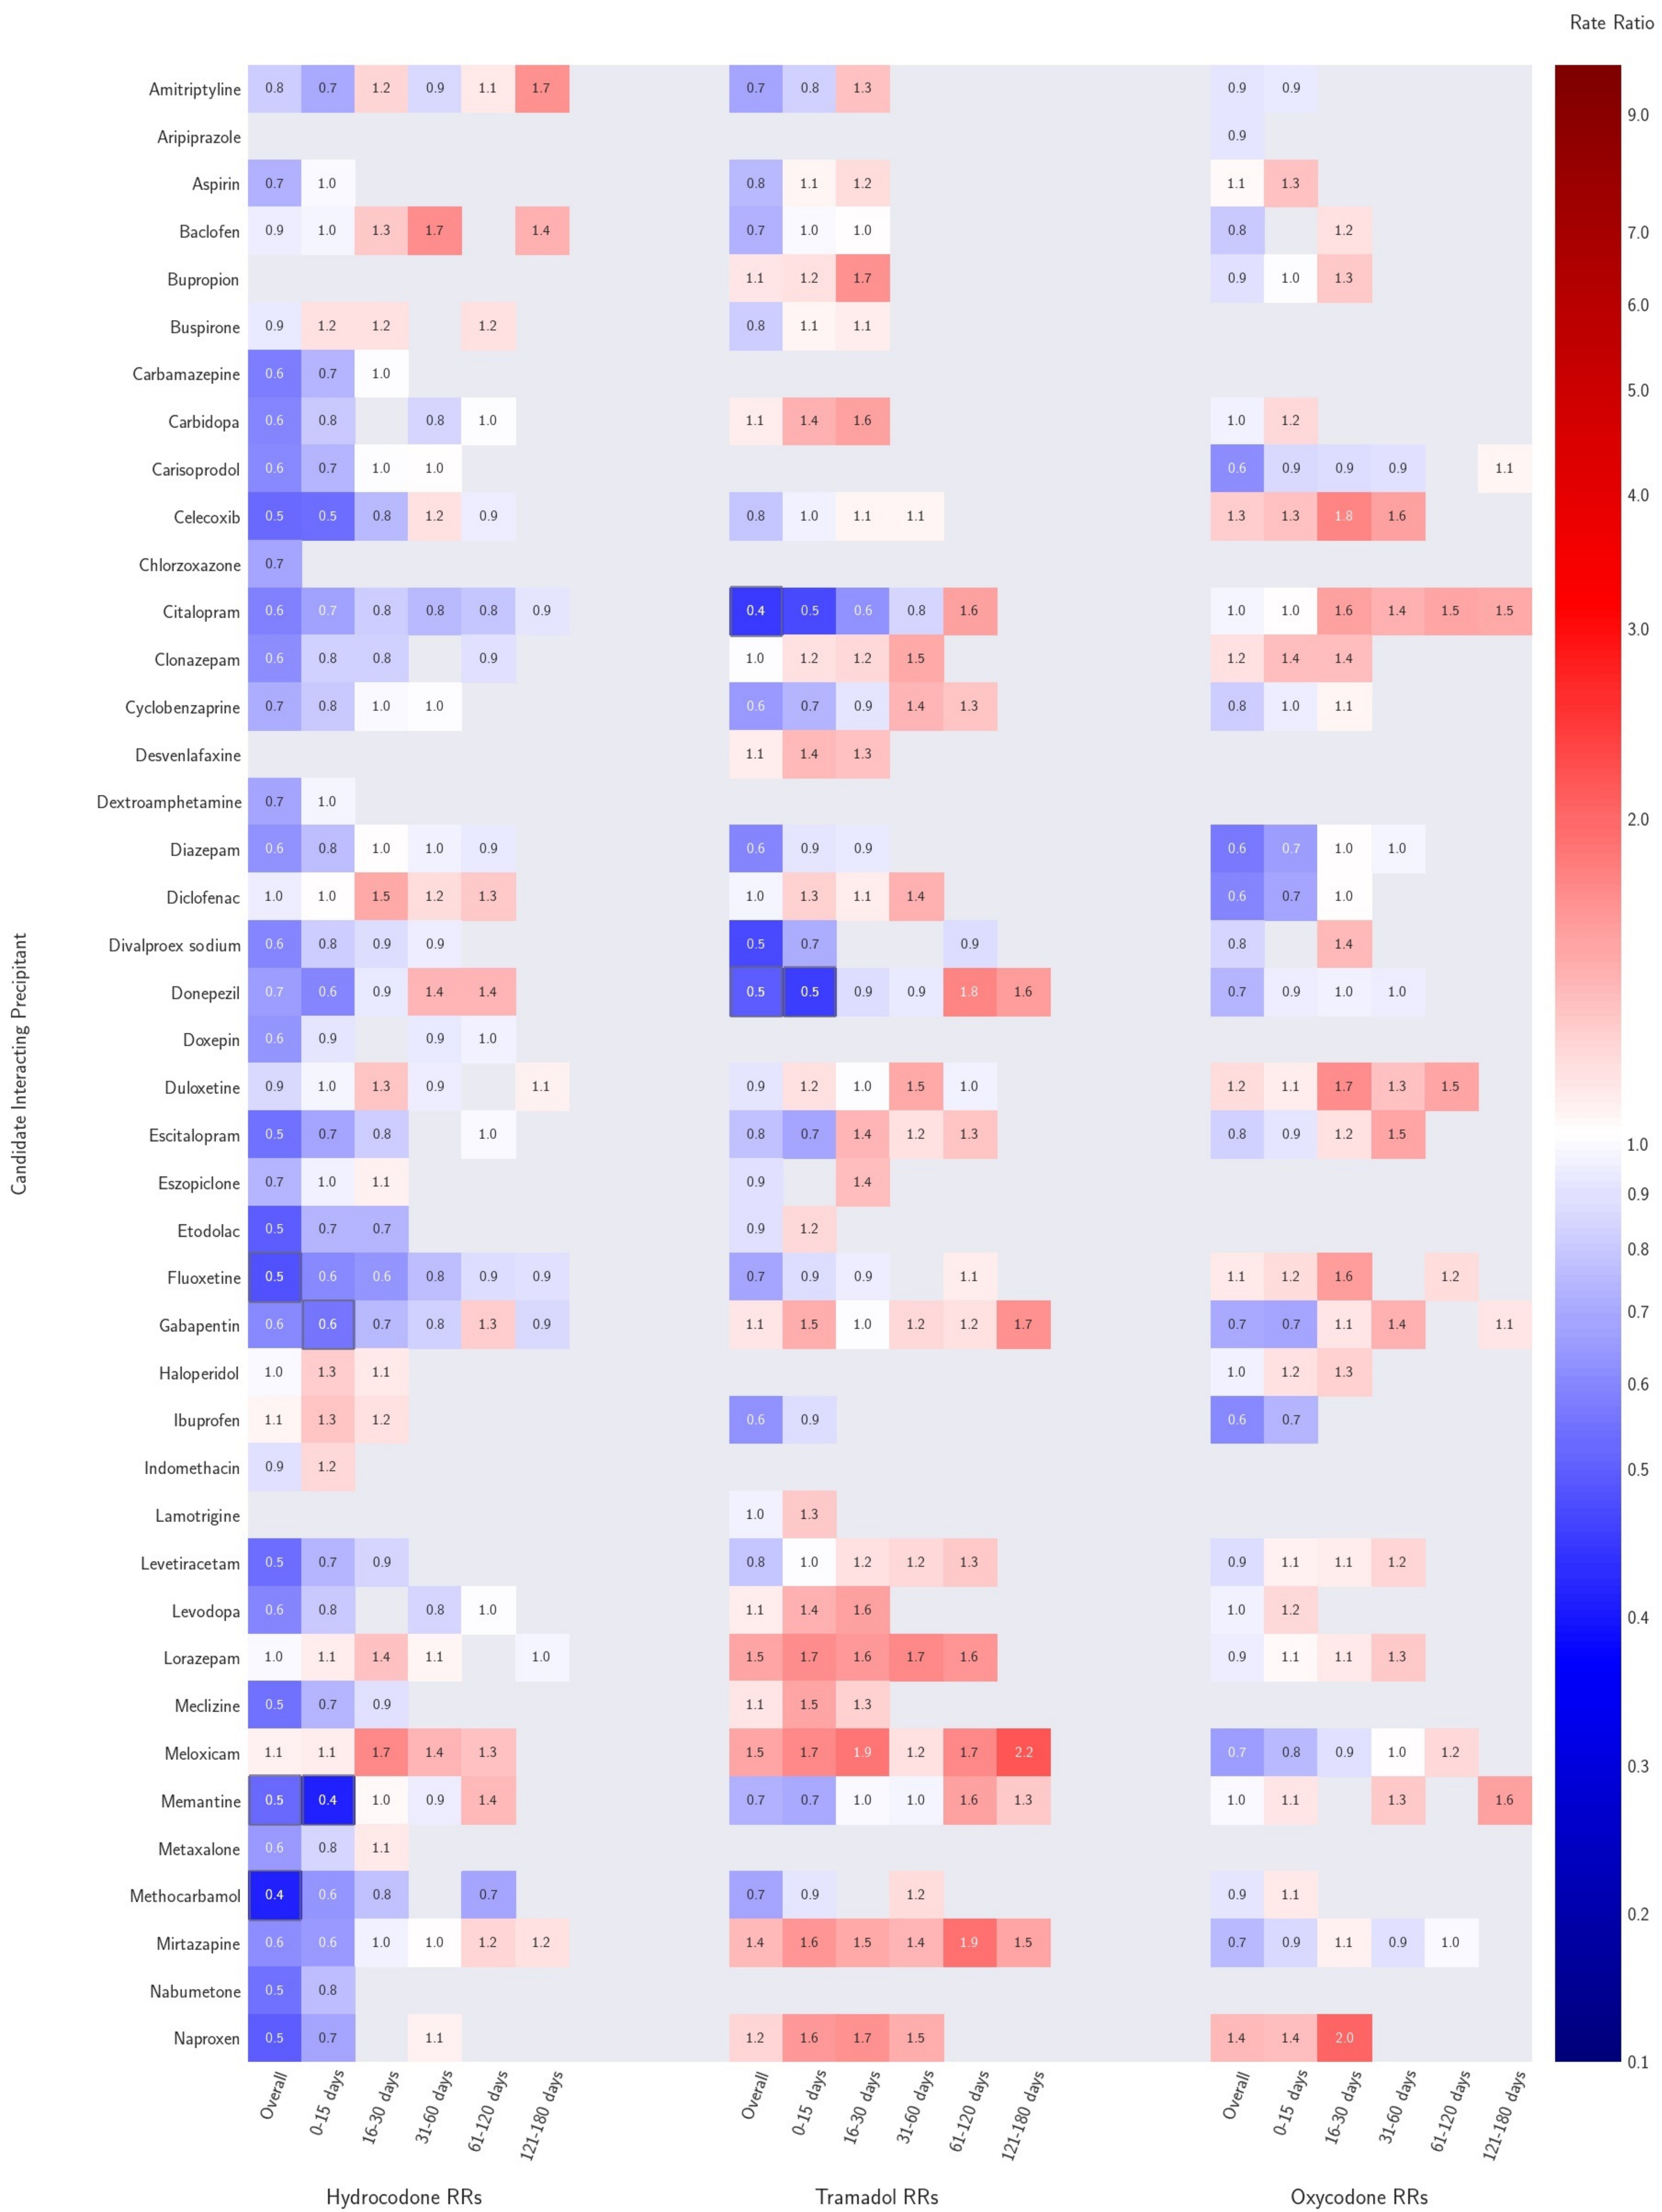



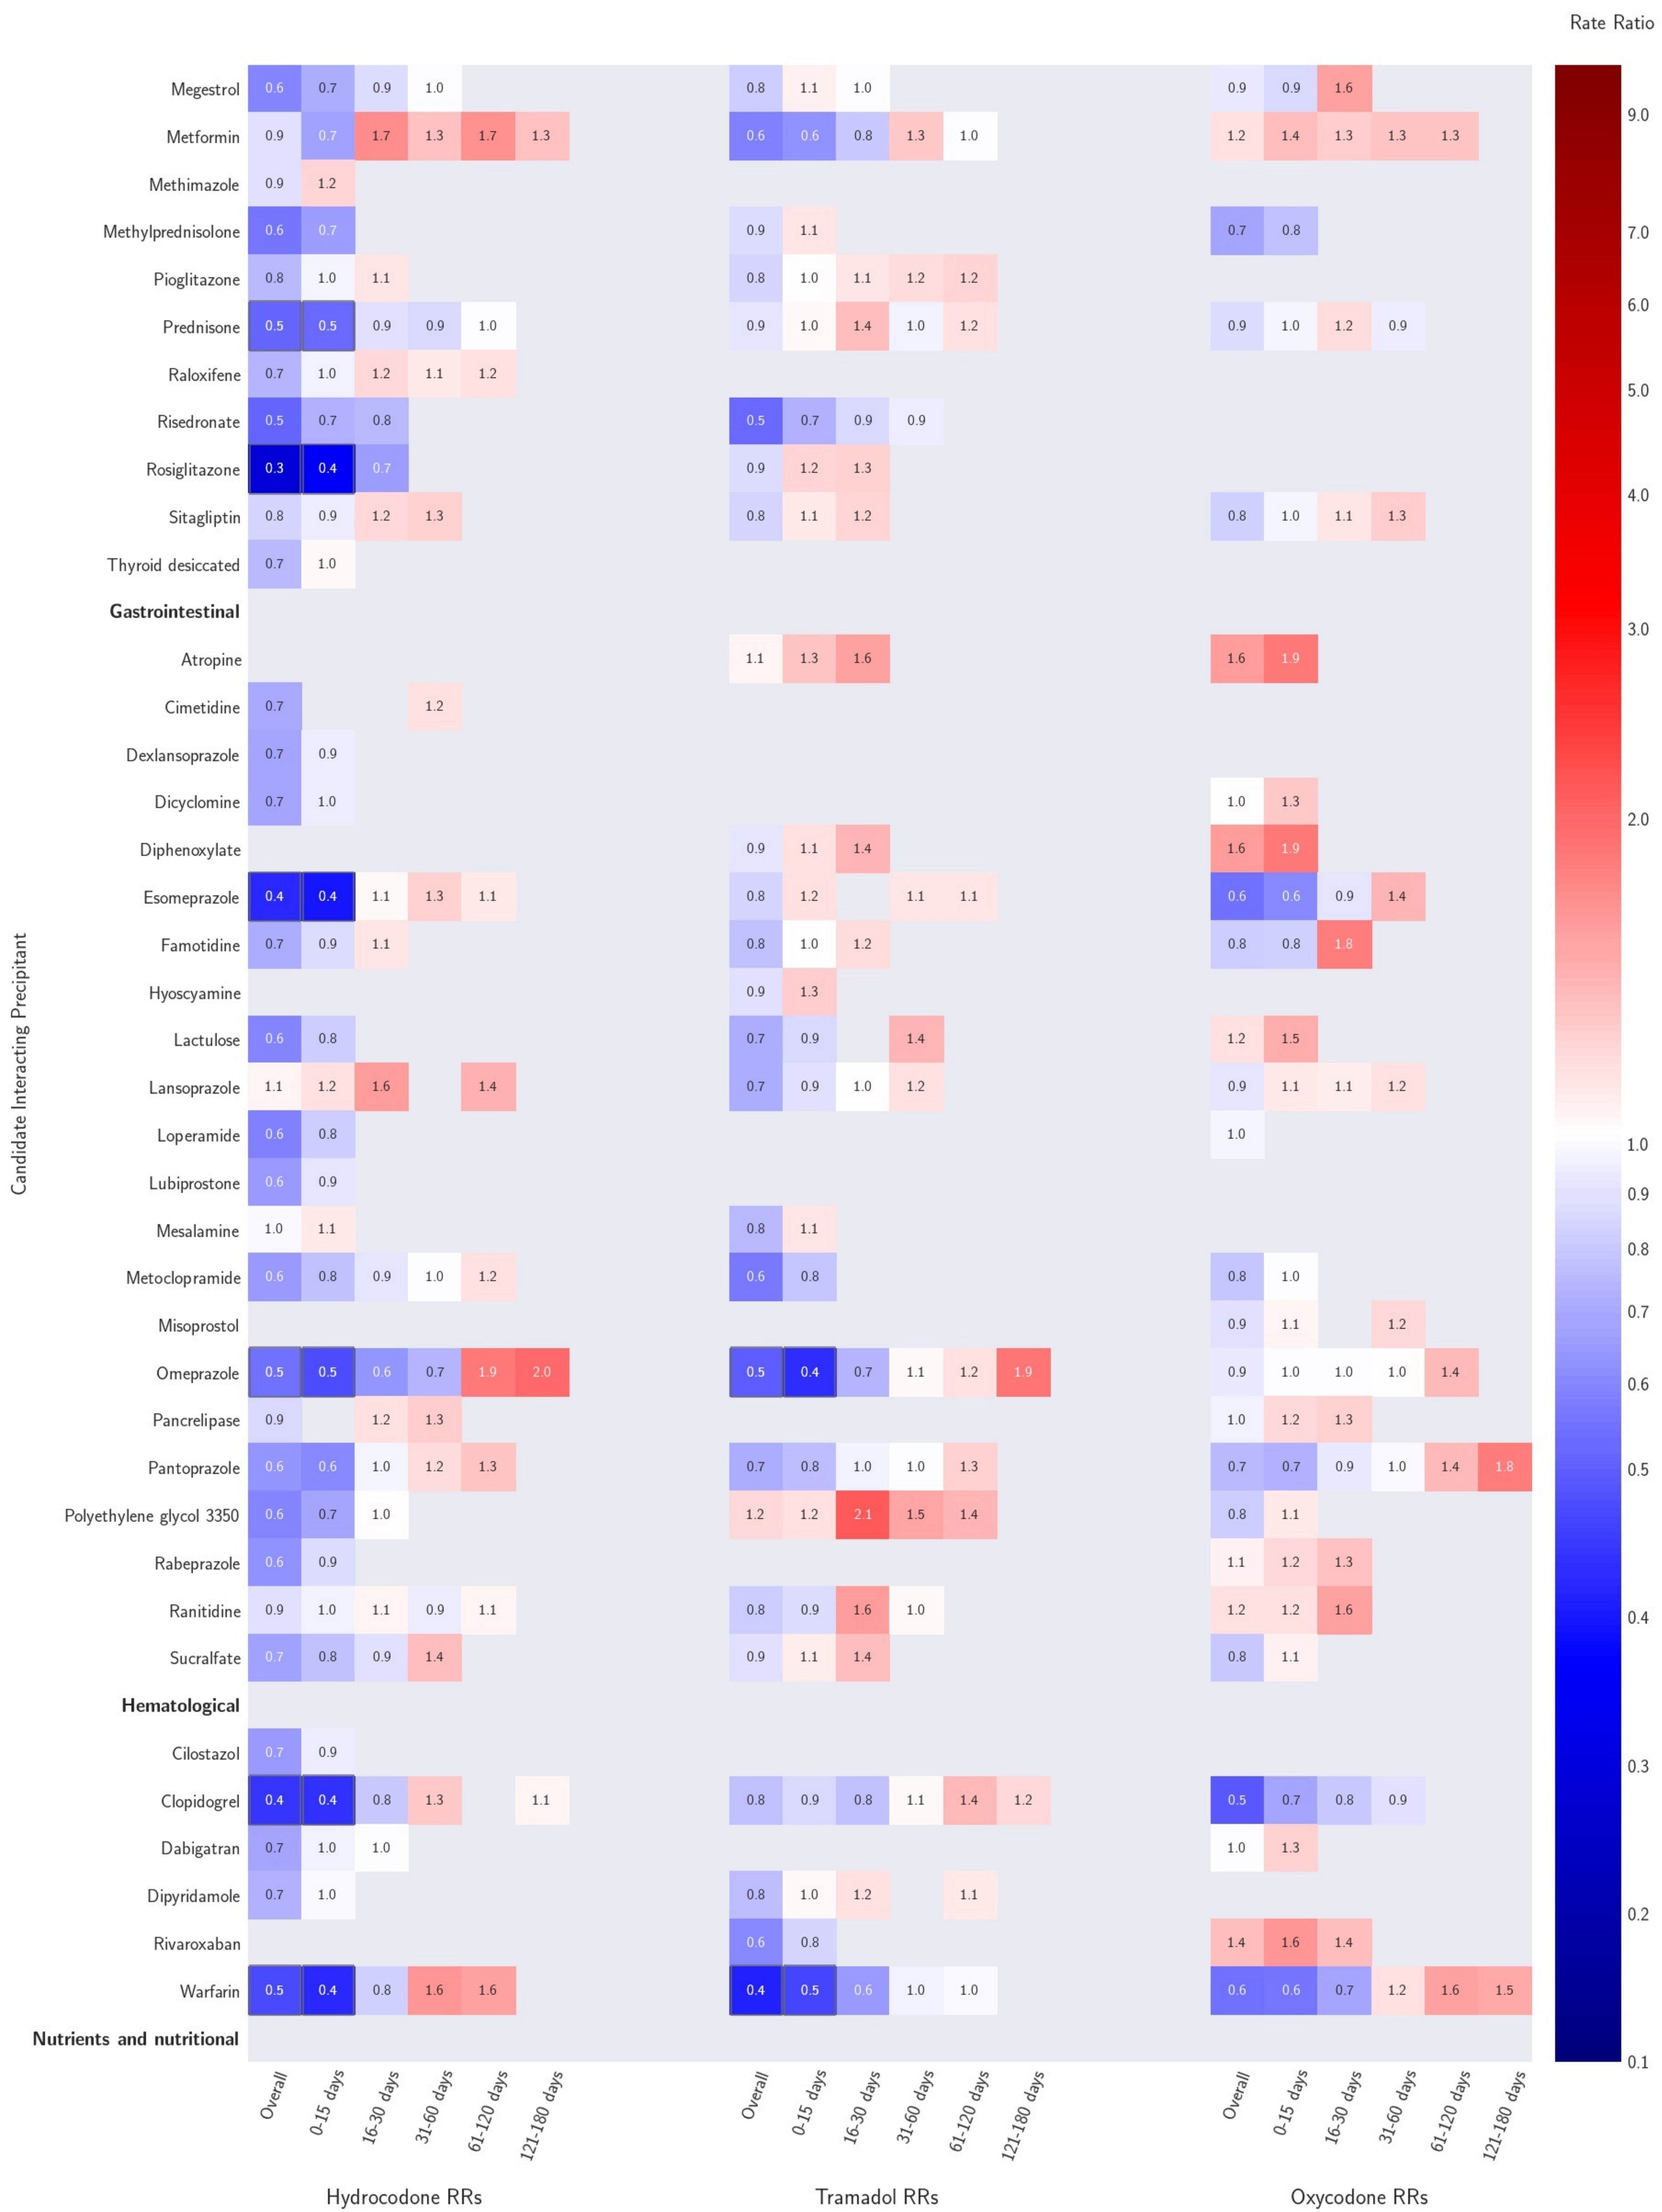

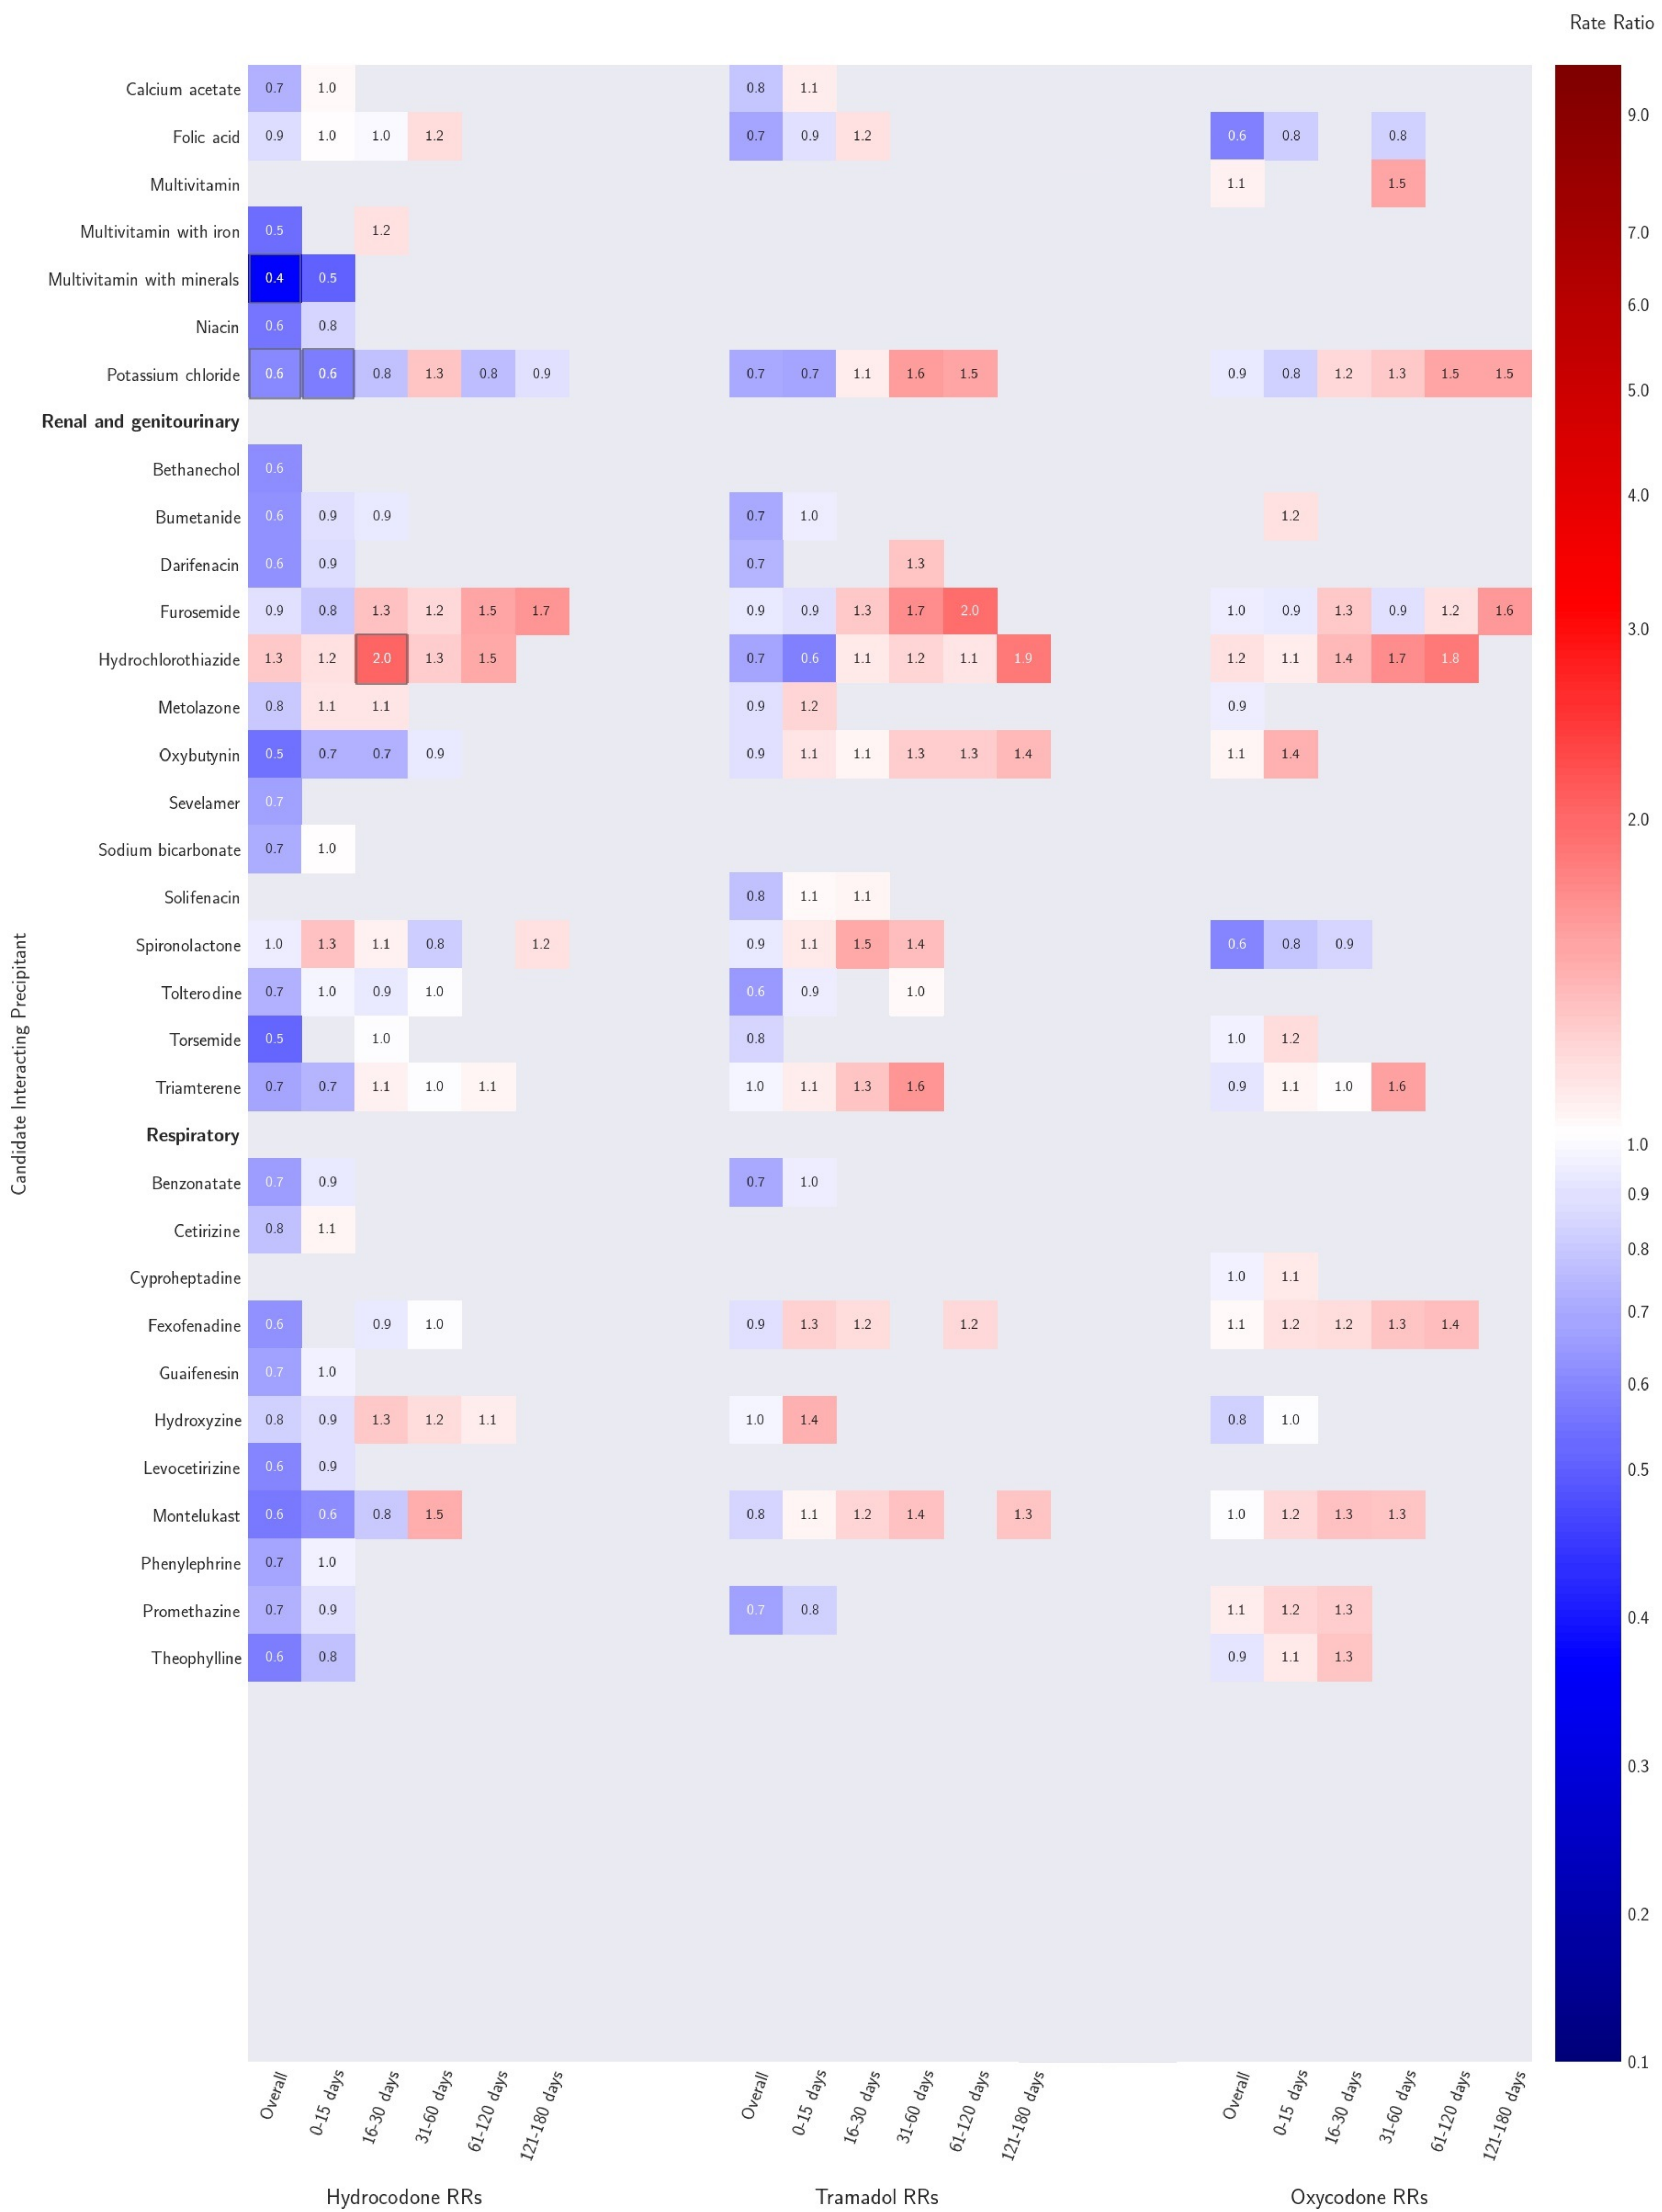

Supplement: NIHMS1618269-supplement-2.pdf [file NIHMS1618269-supplement-2.pdf]

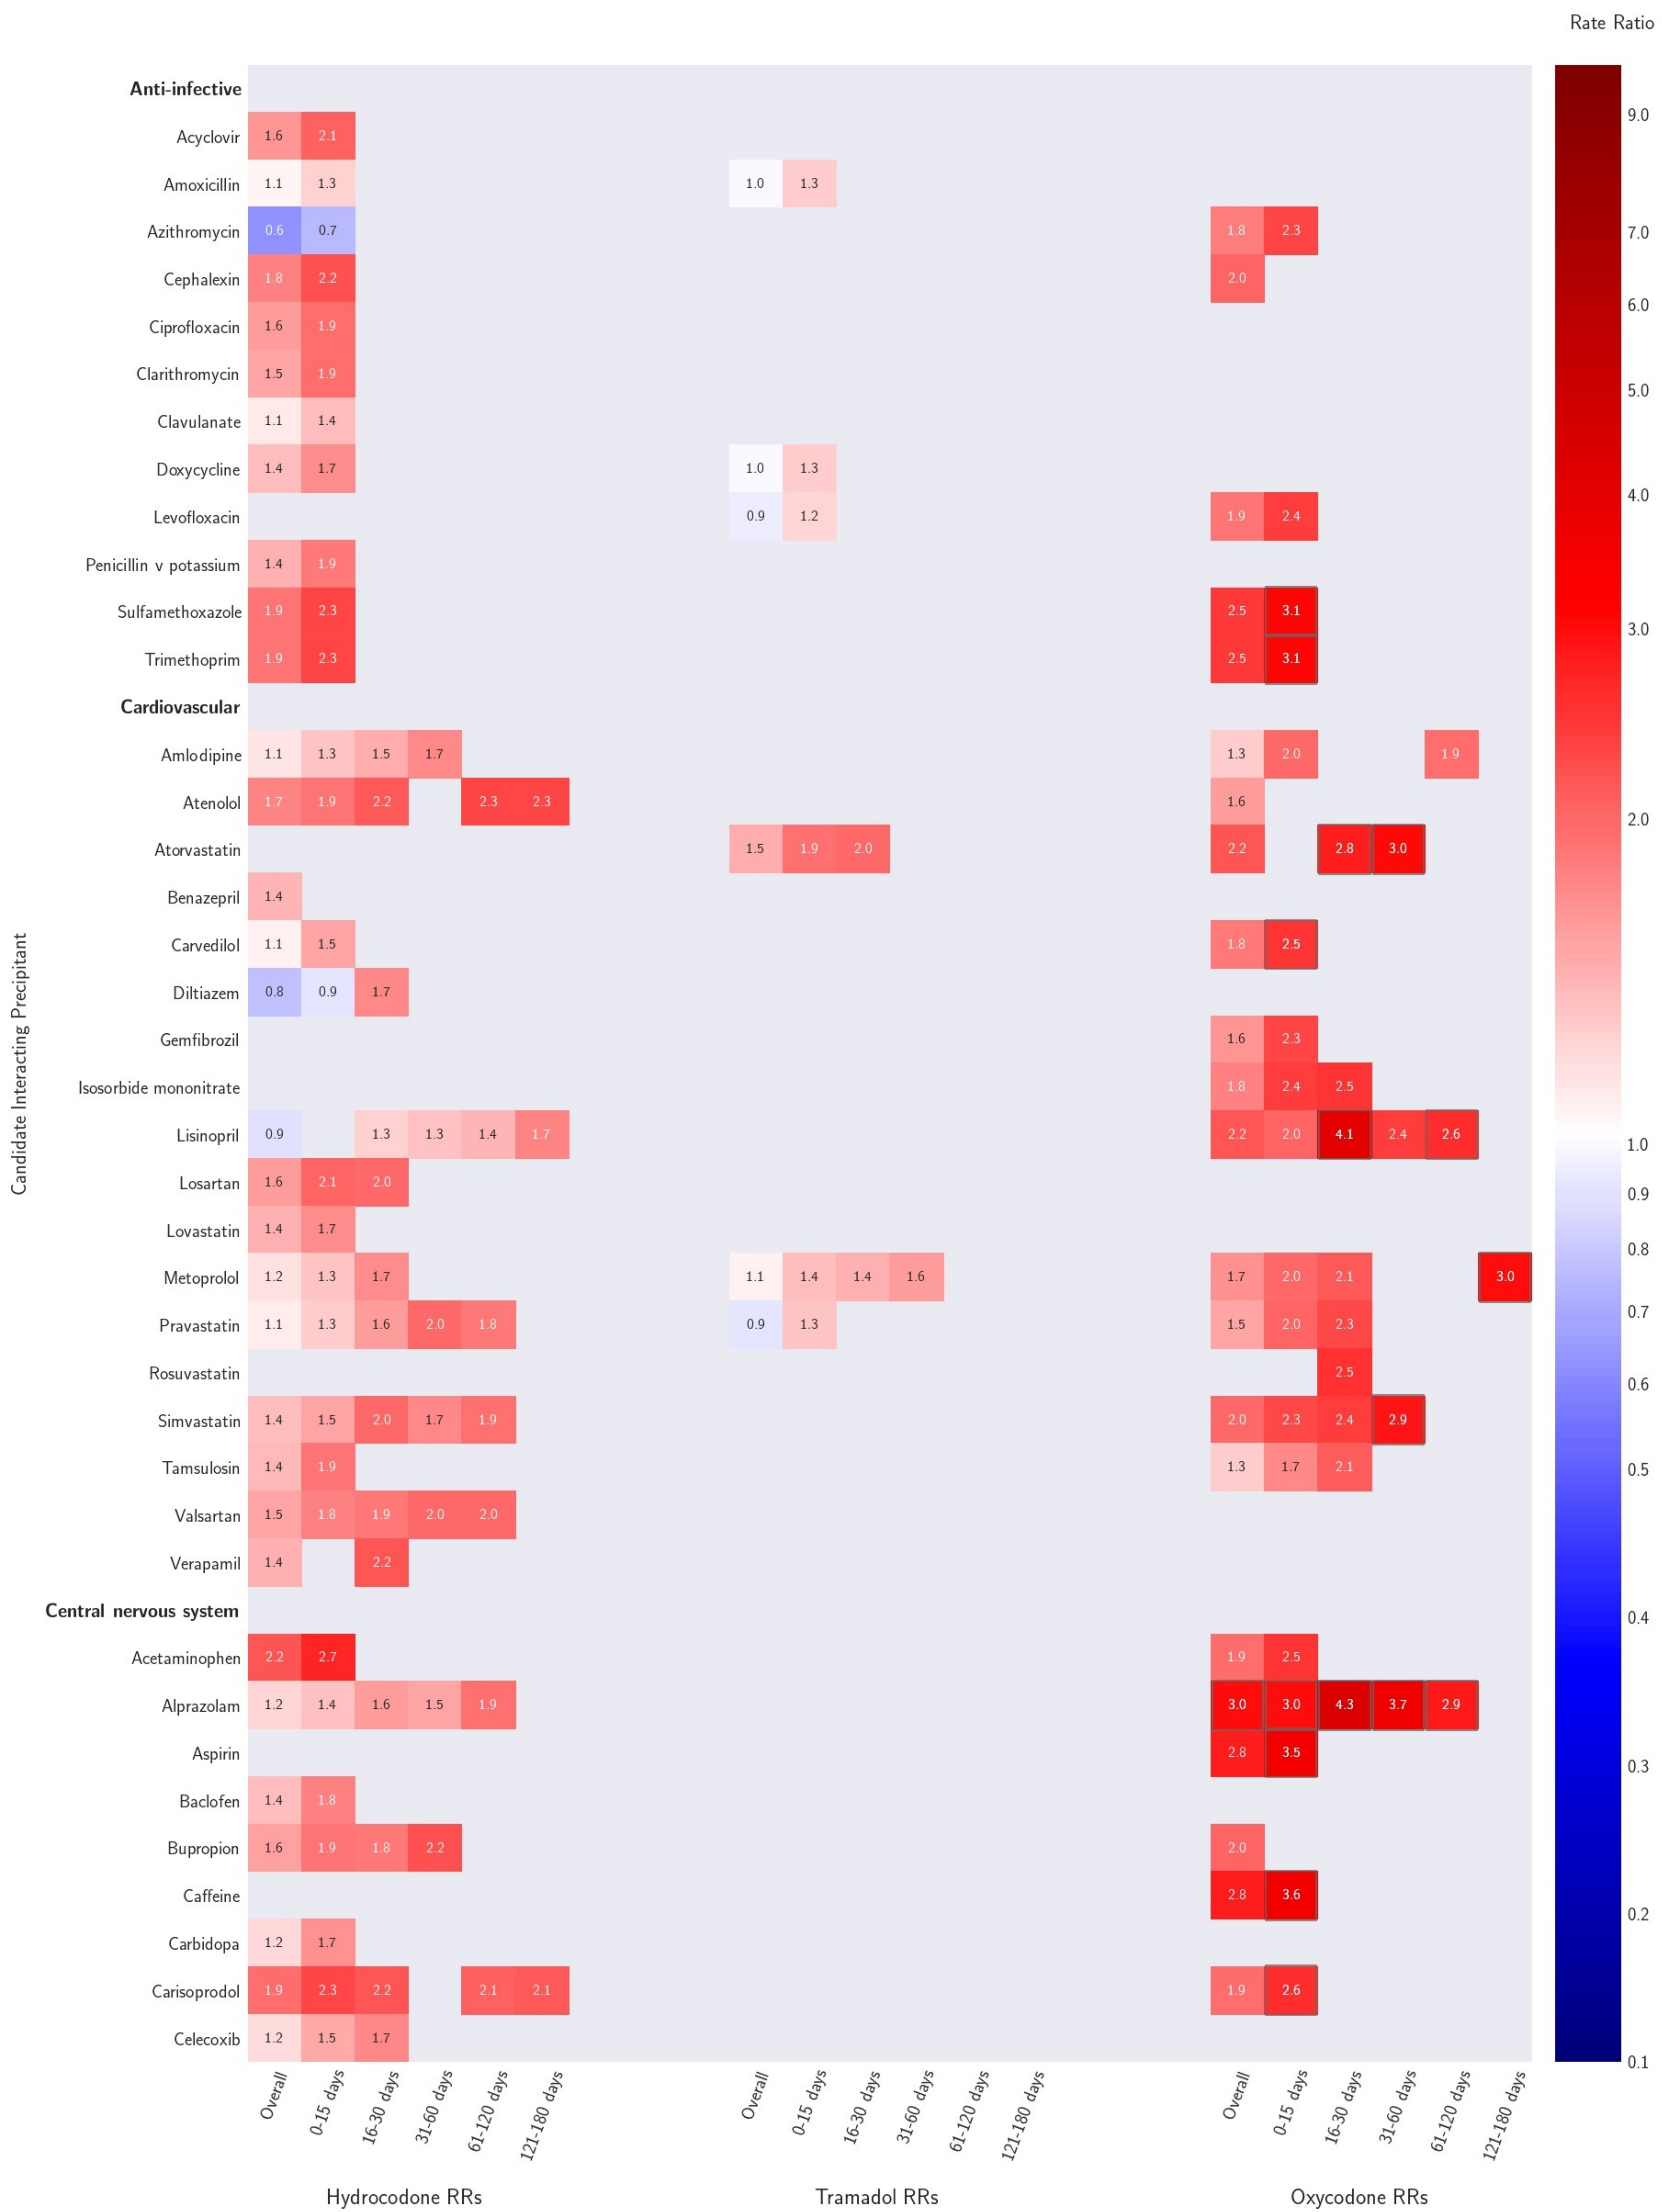

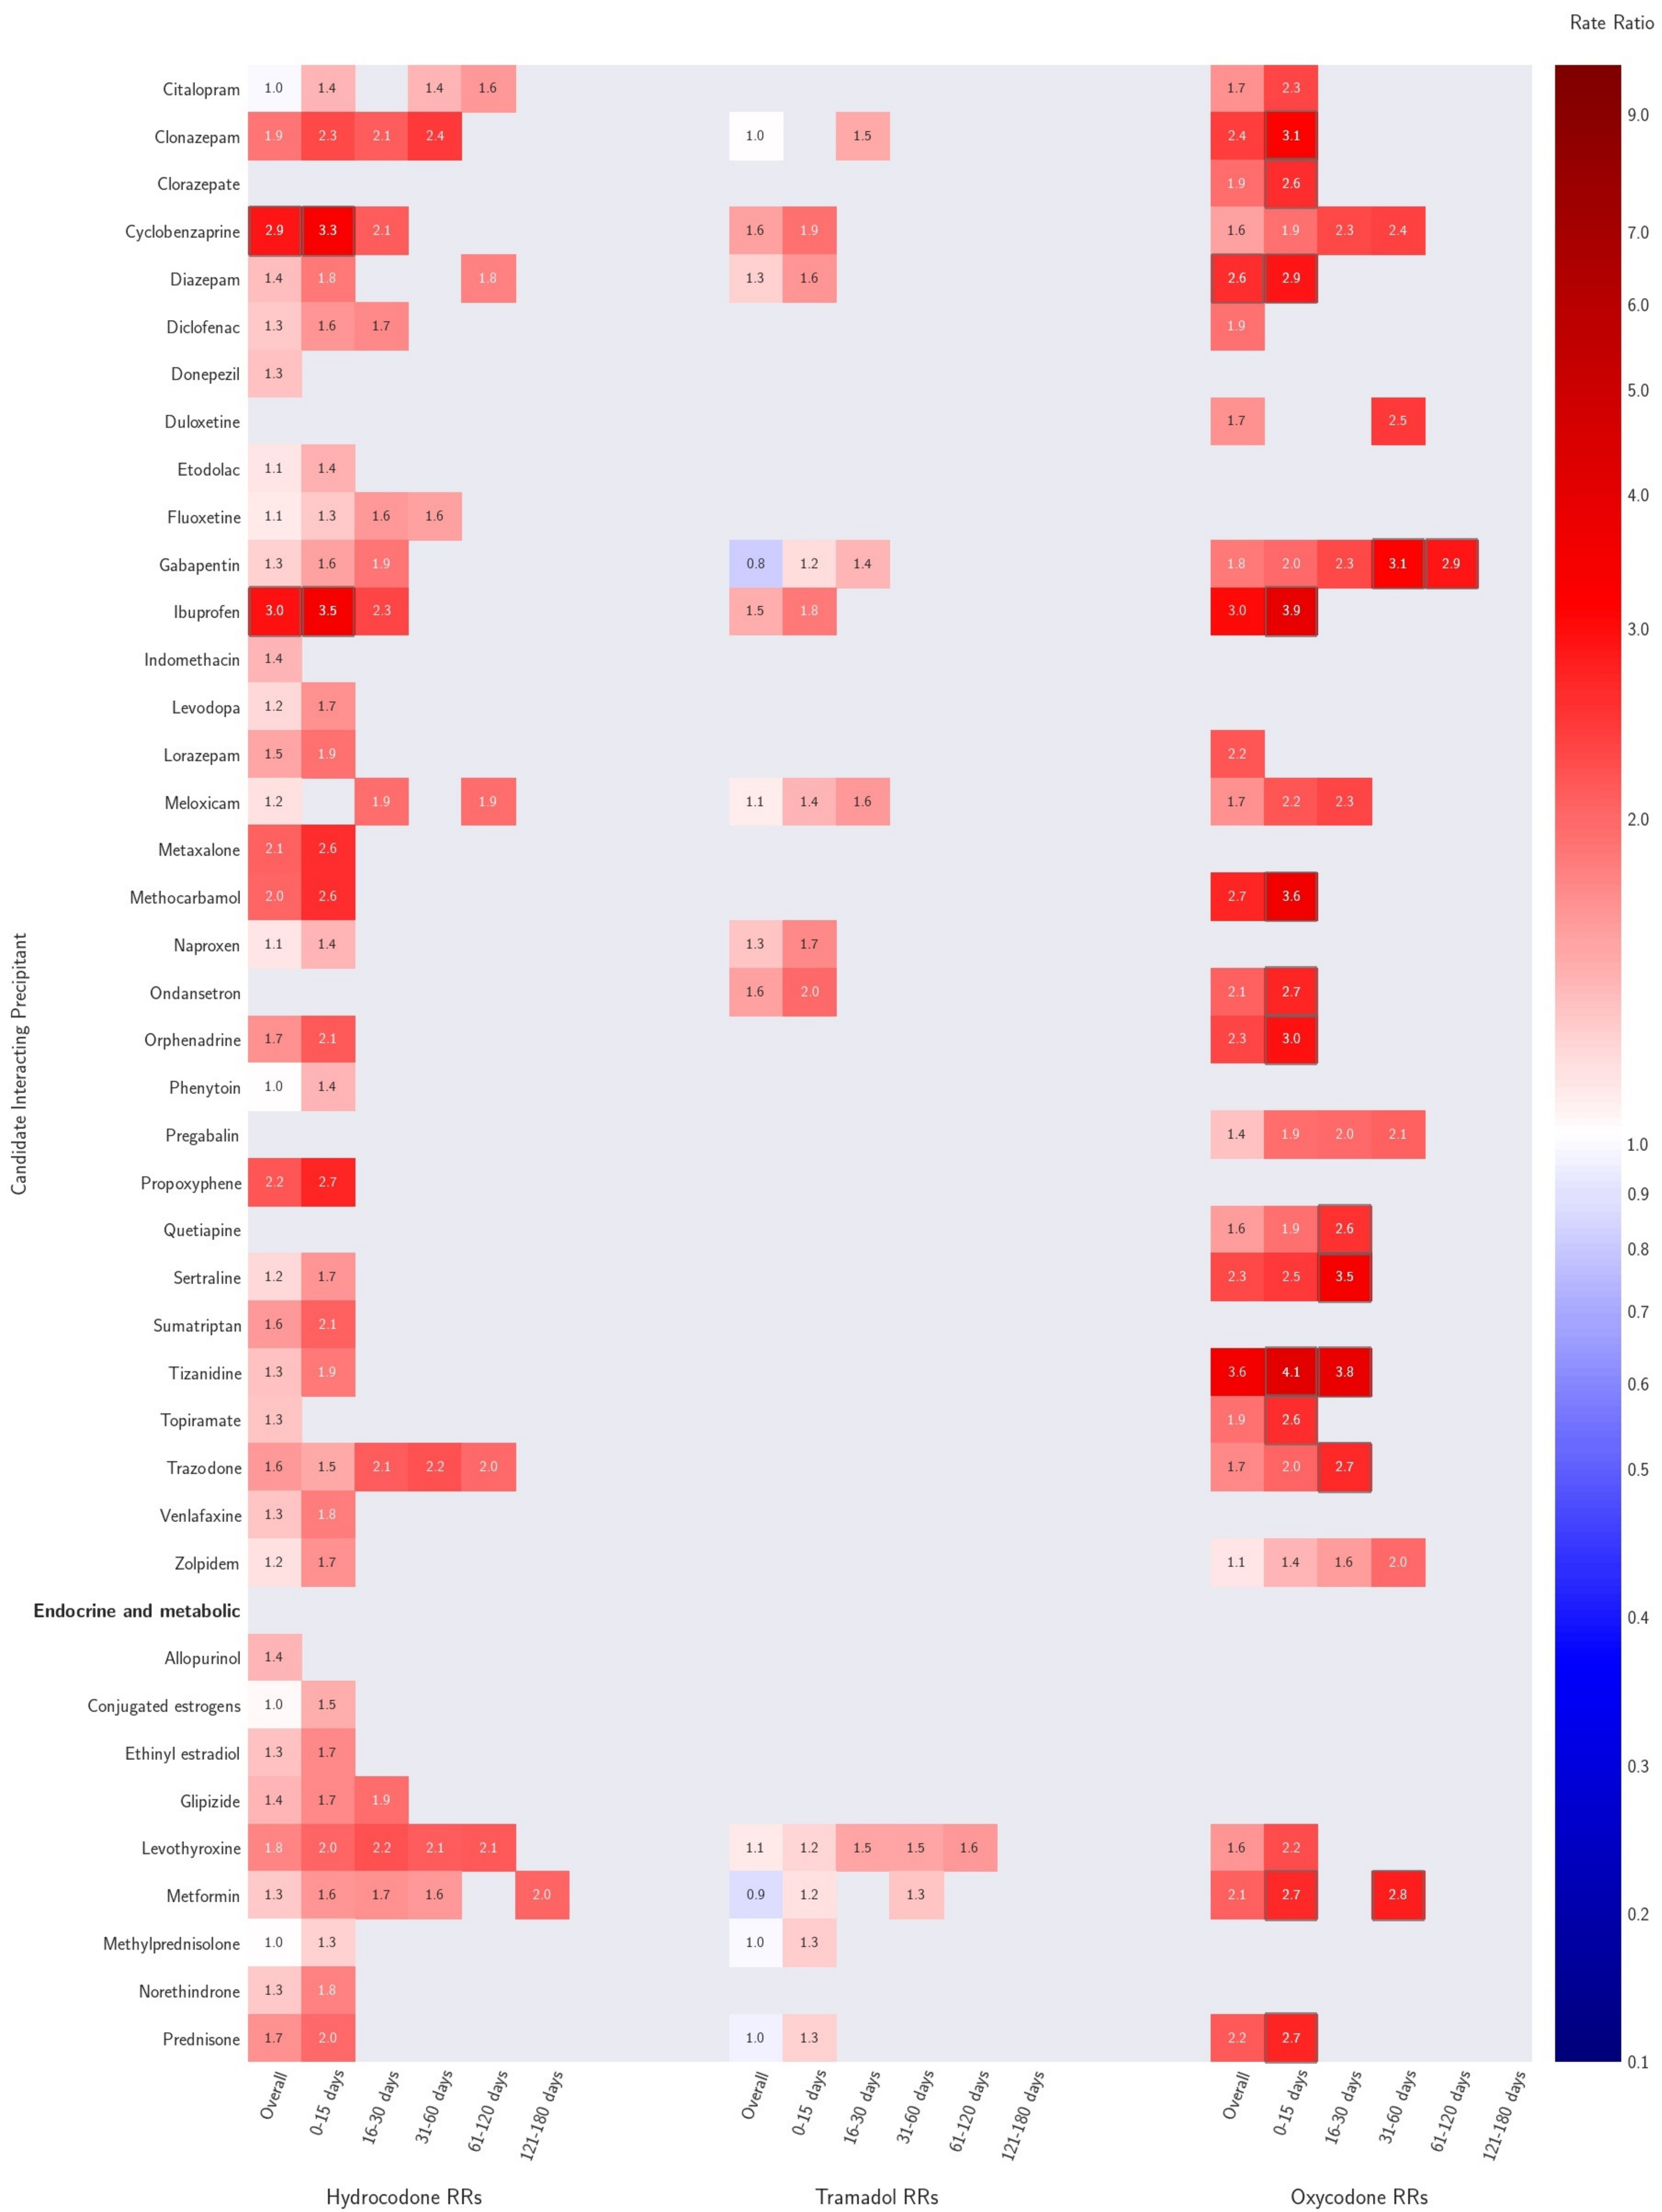

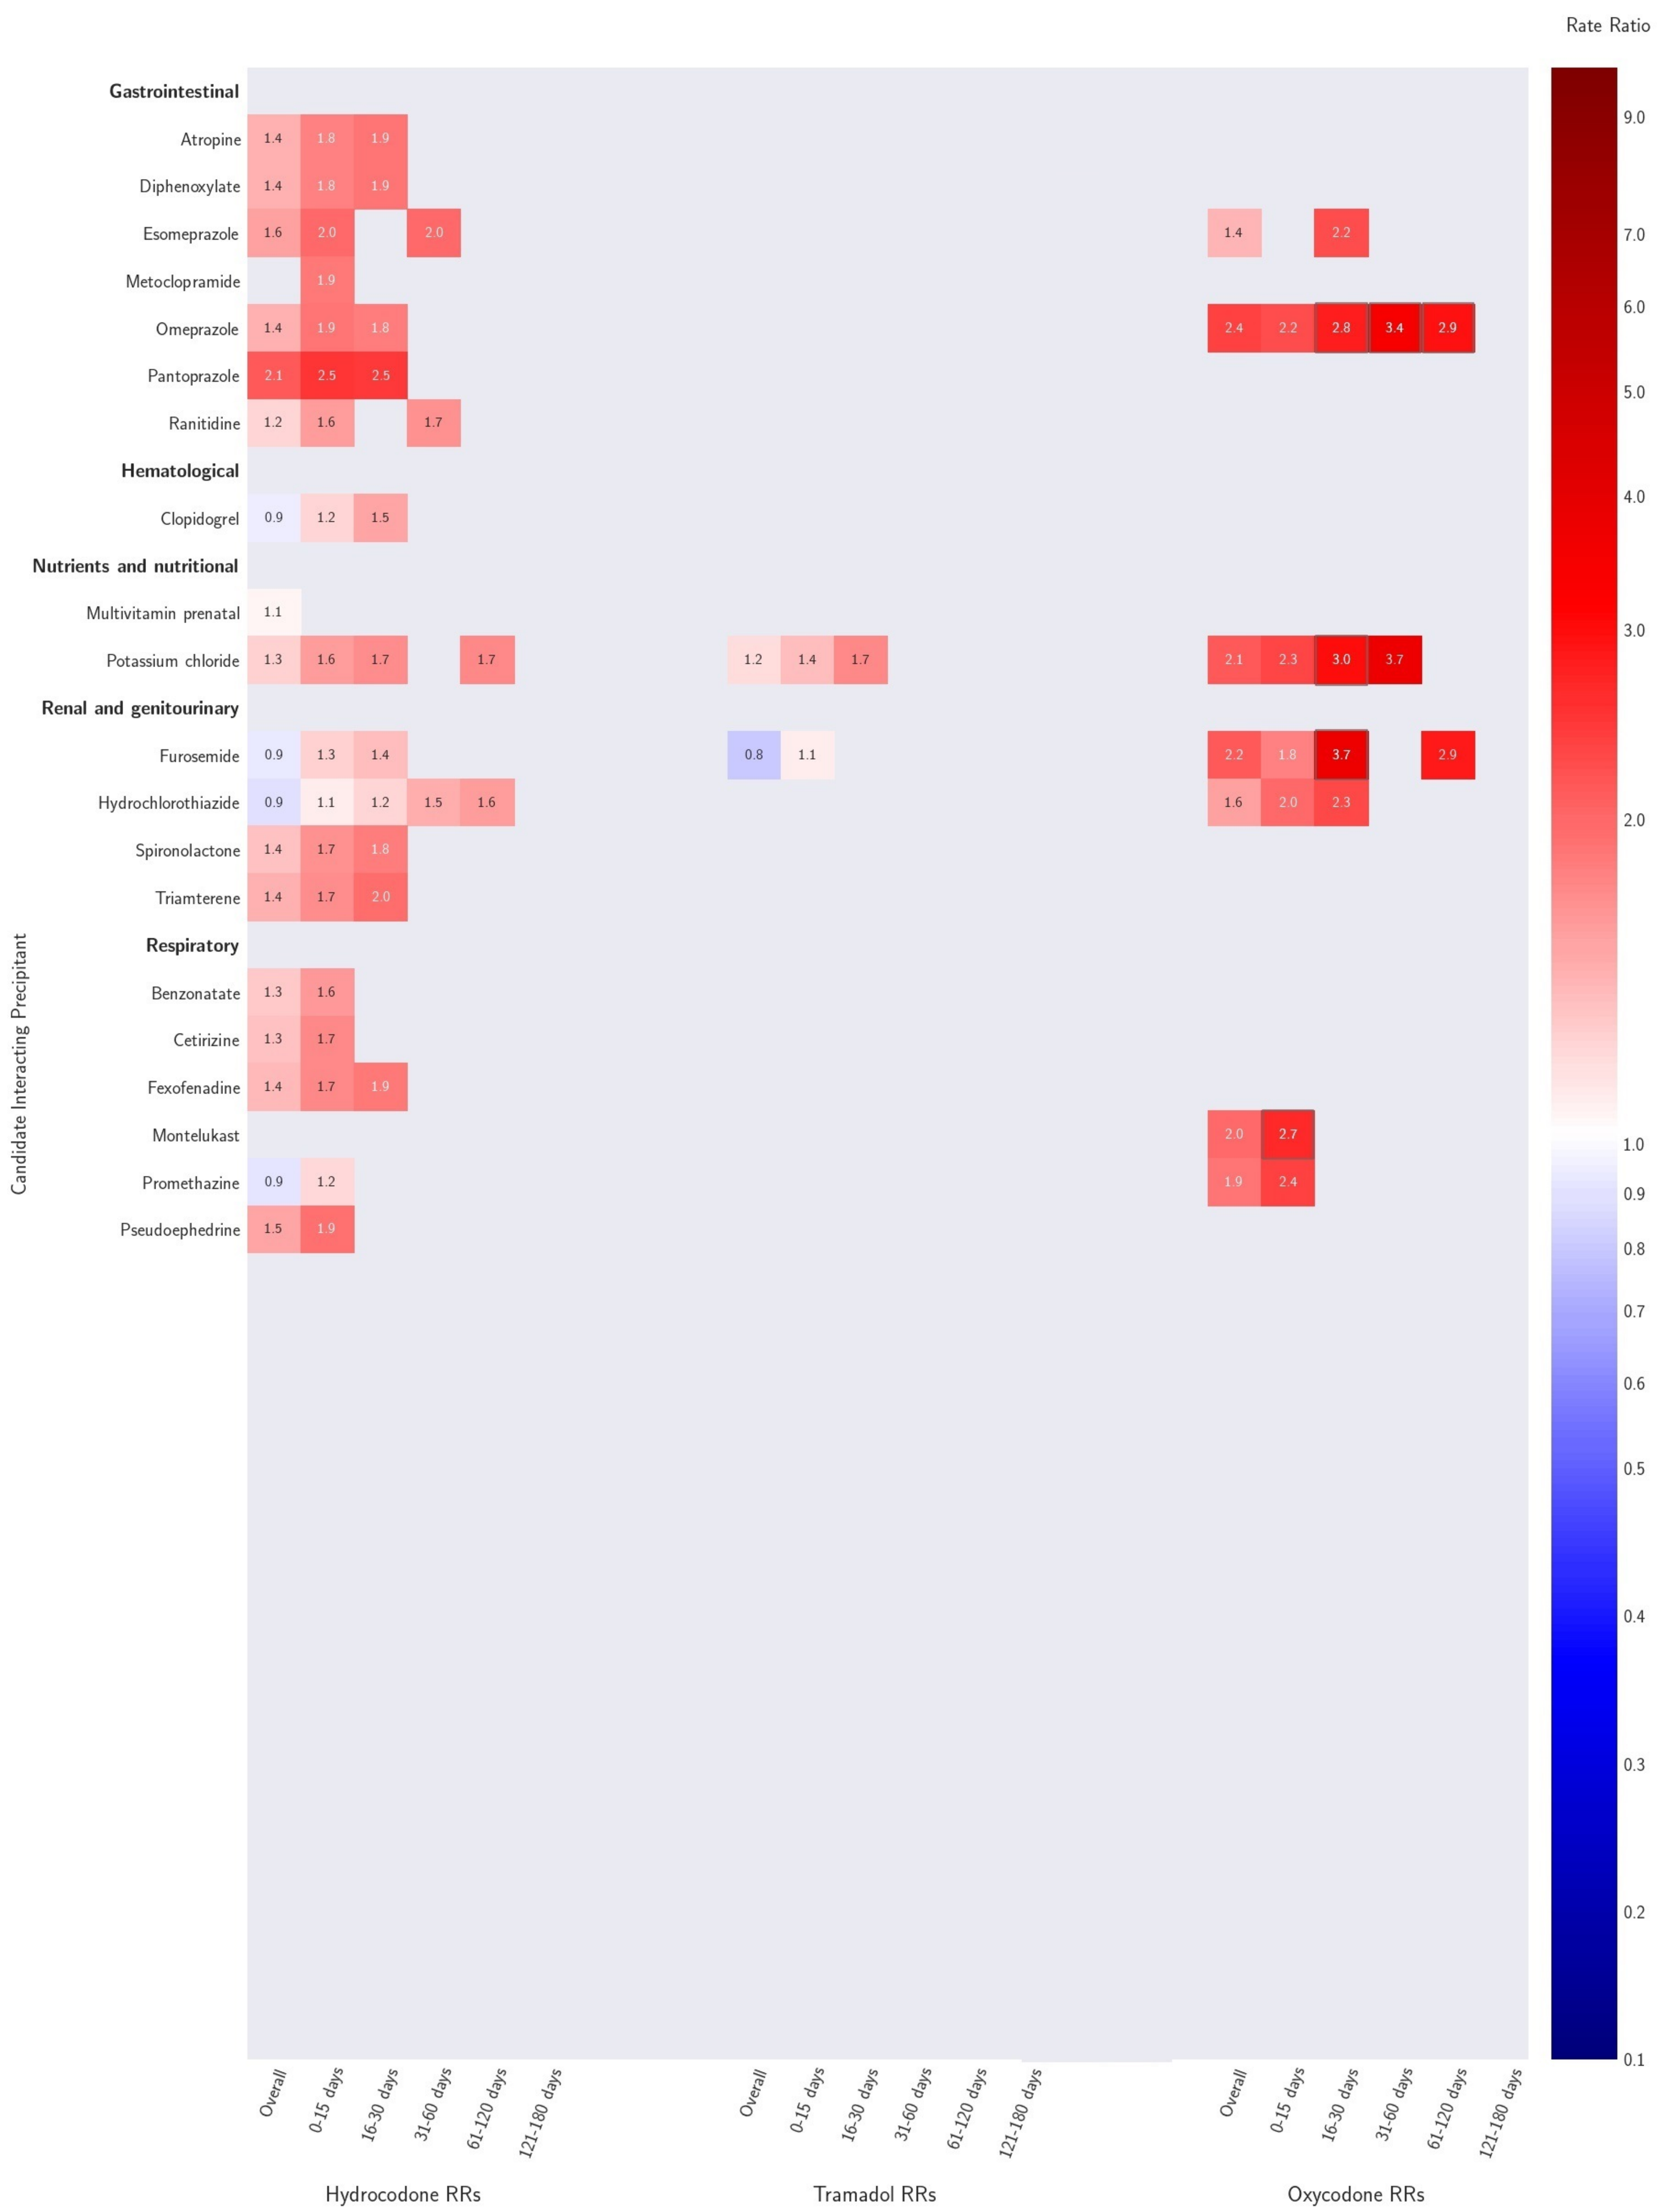

Supplement: NIHMS1618269-supplement-3.pdf [file NIHMS1618269-supplement-3.pdf]

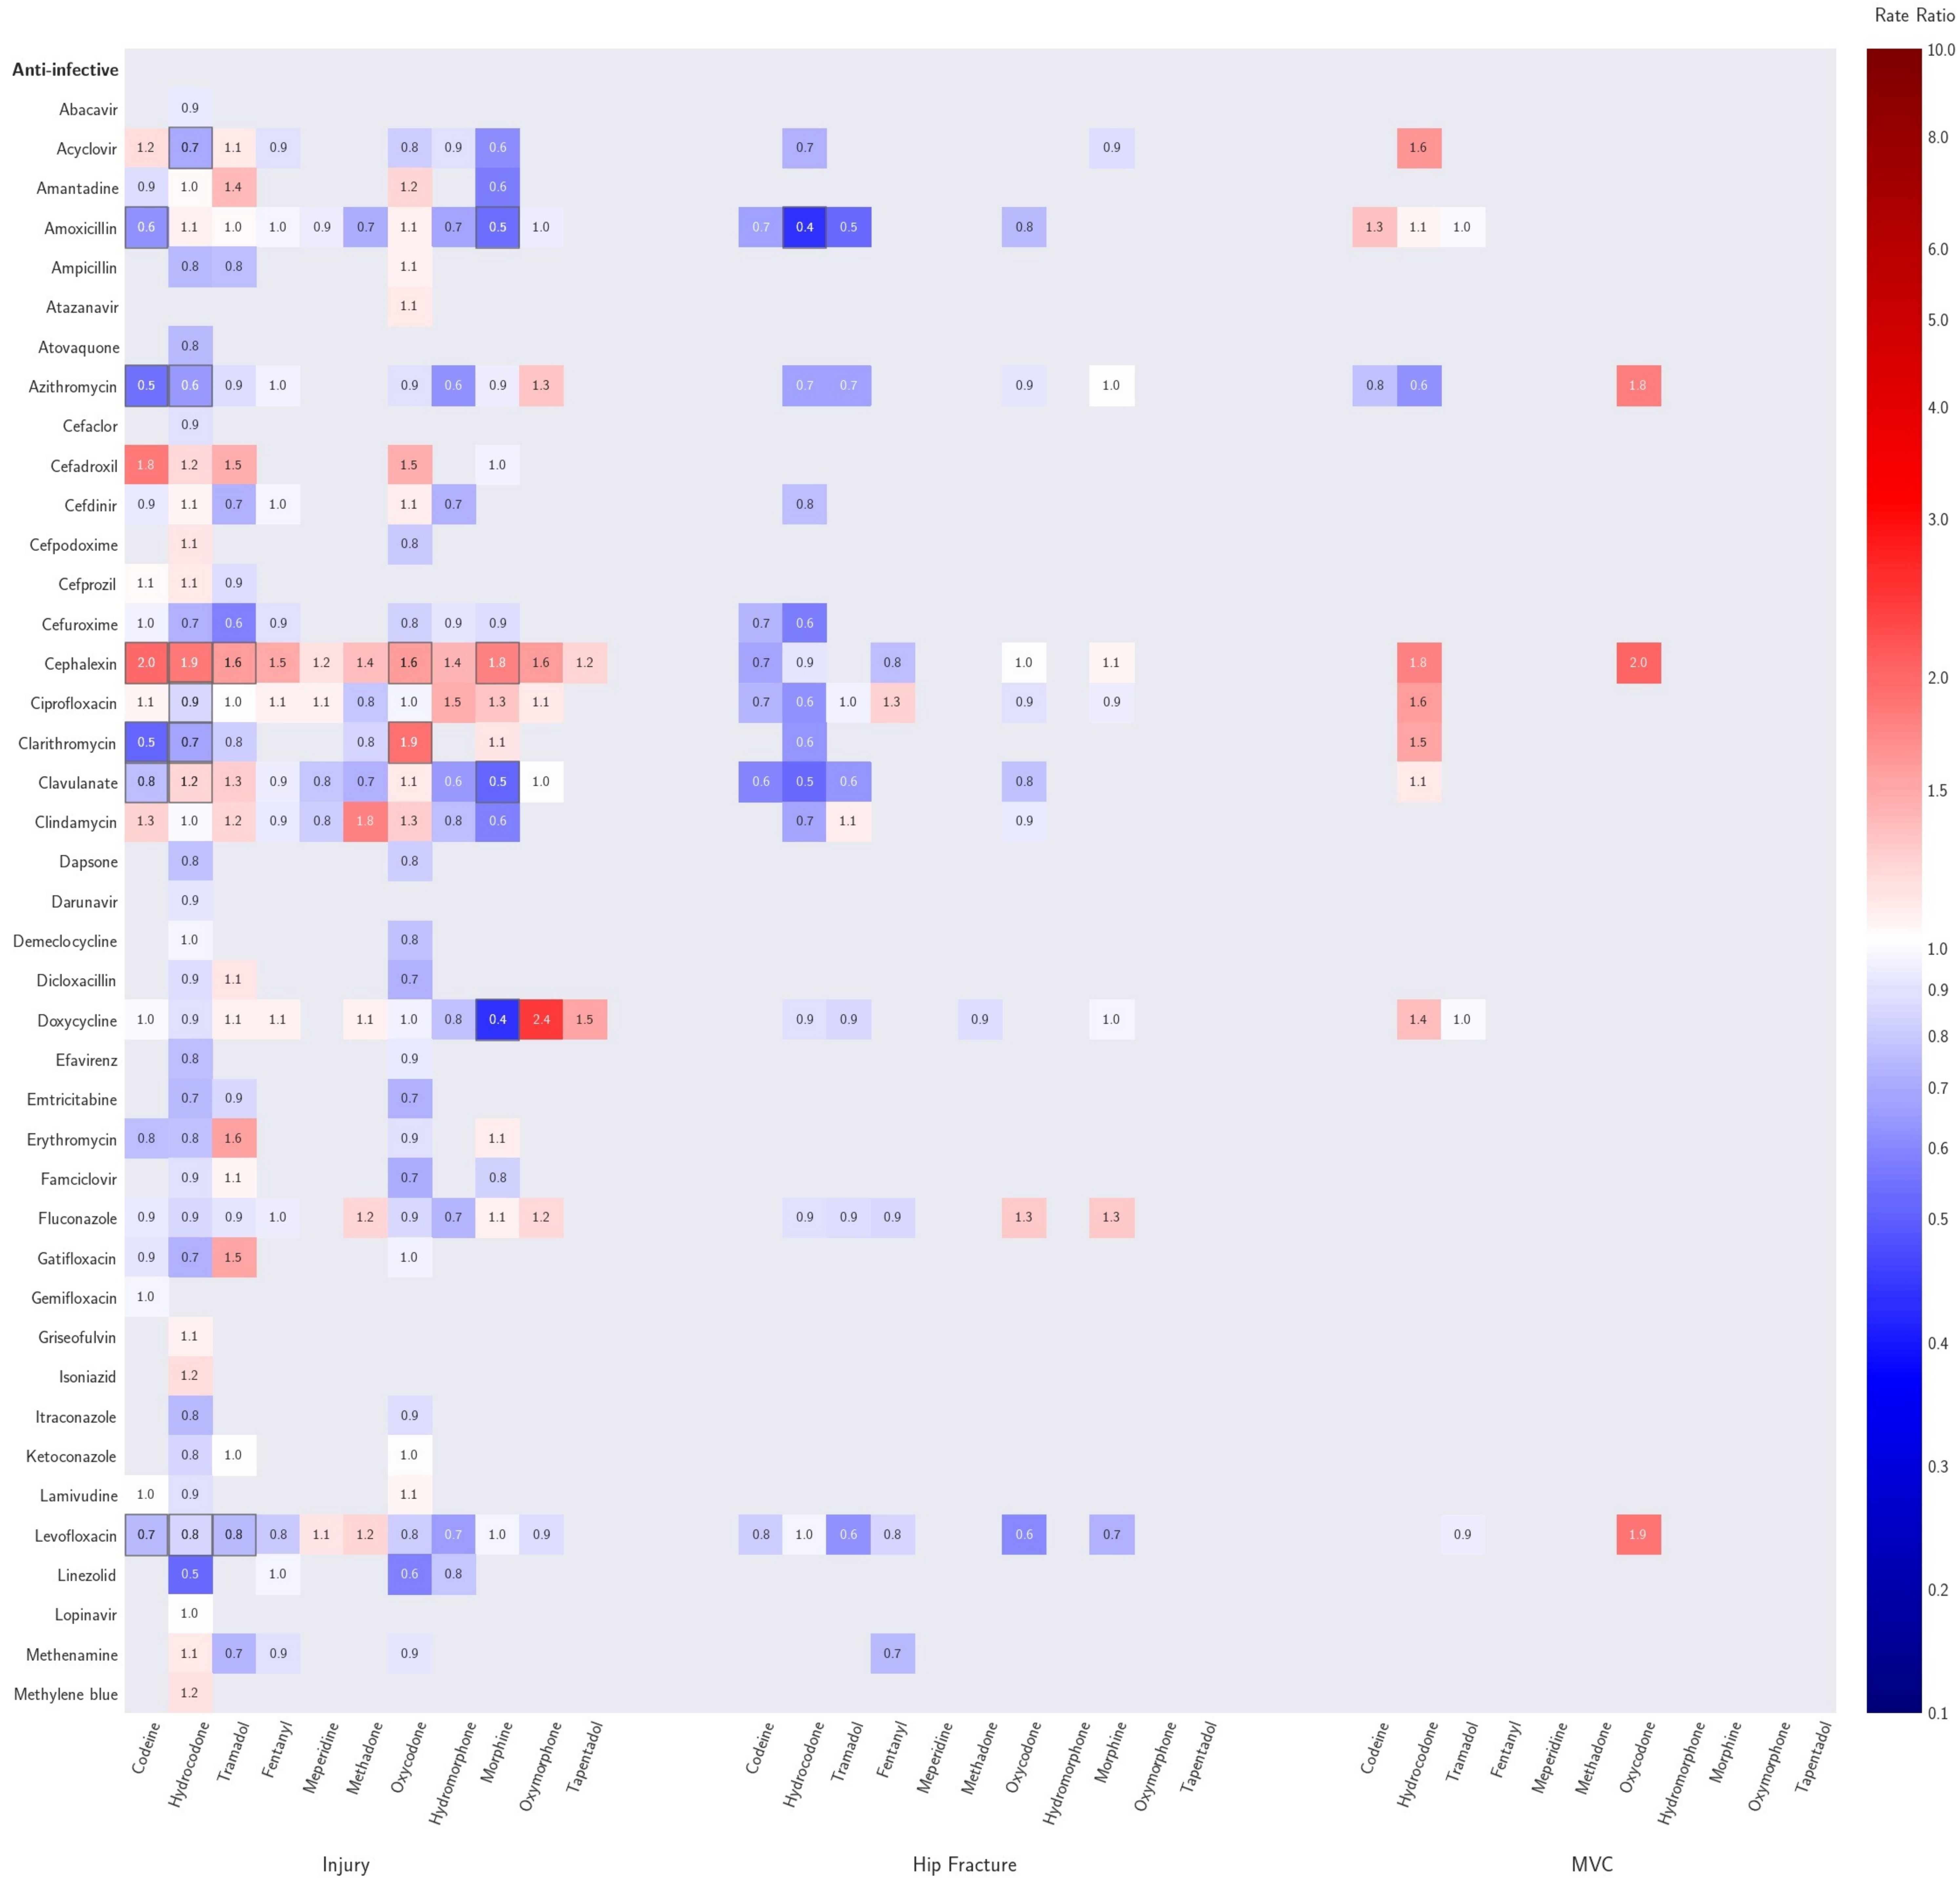

Rate Ratio

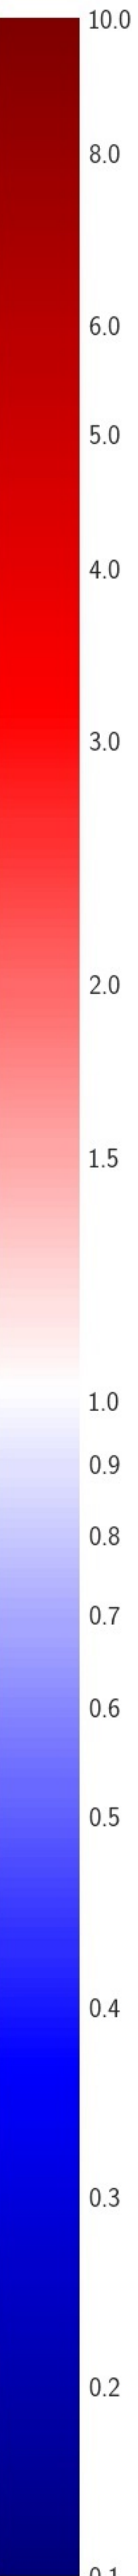

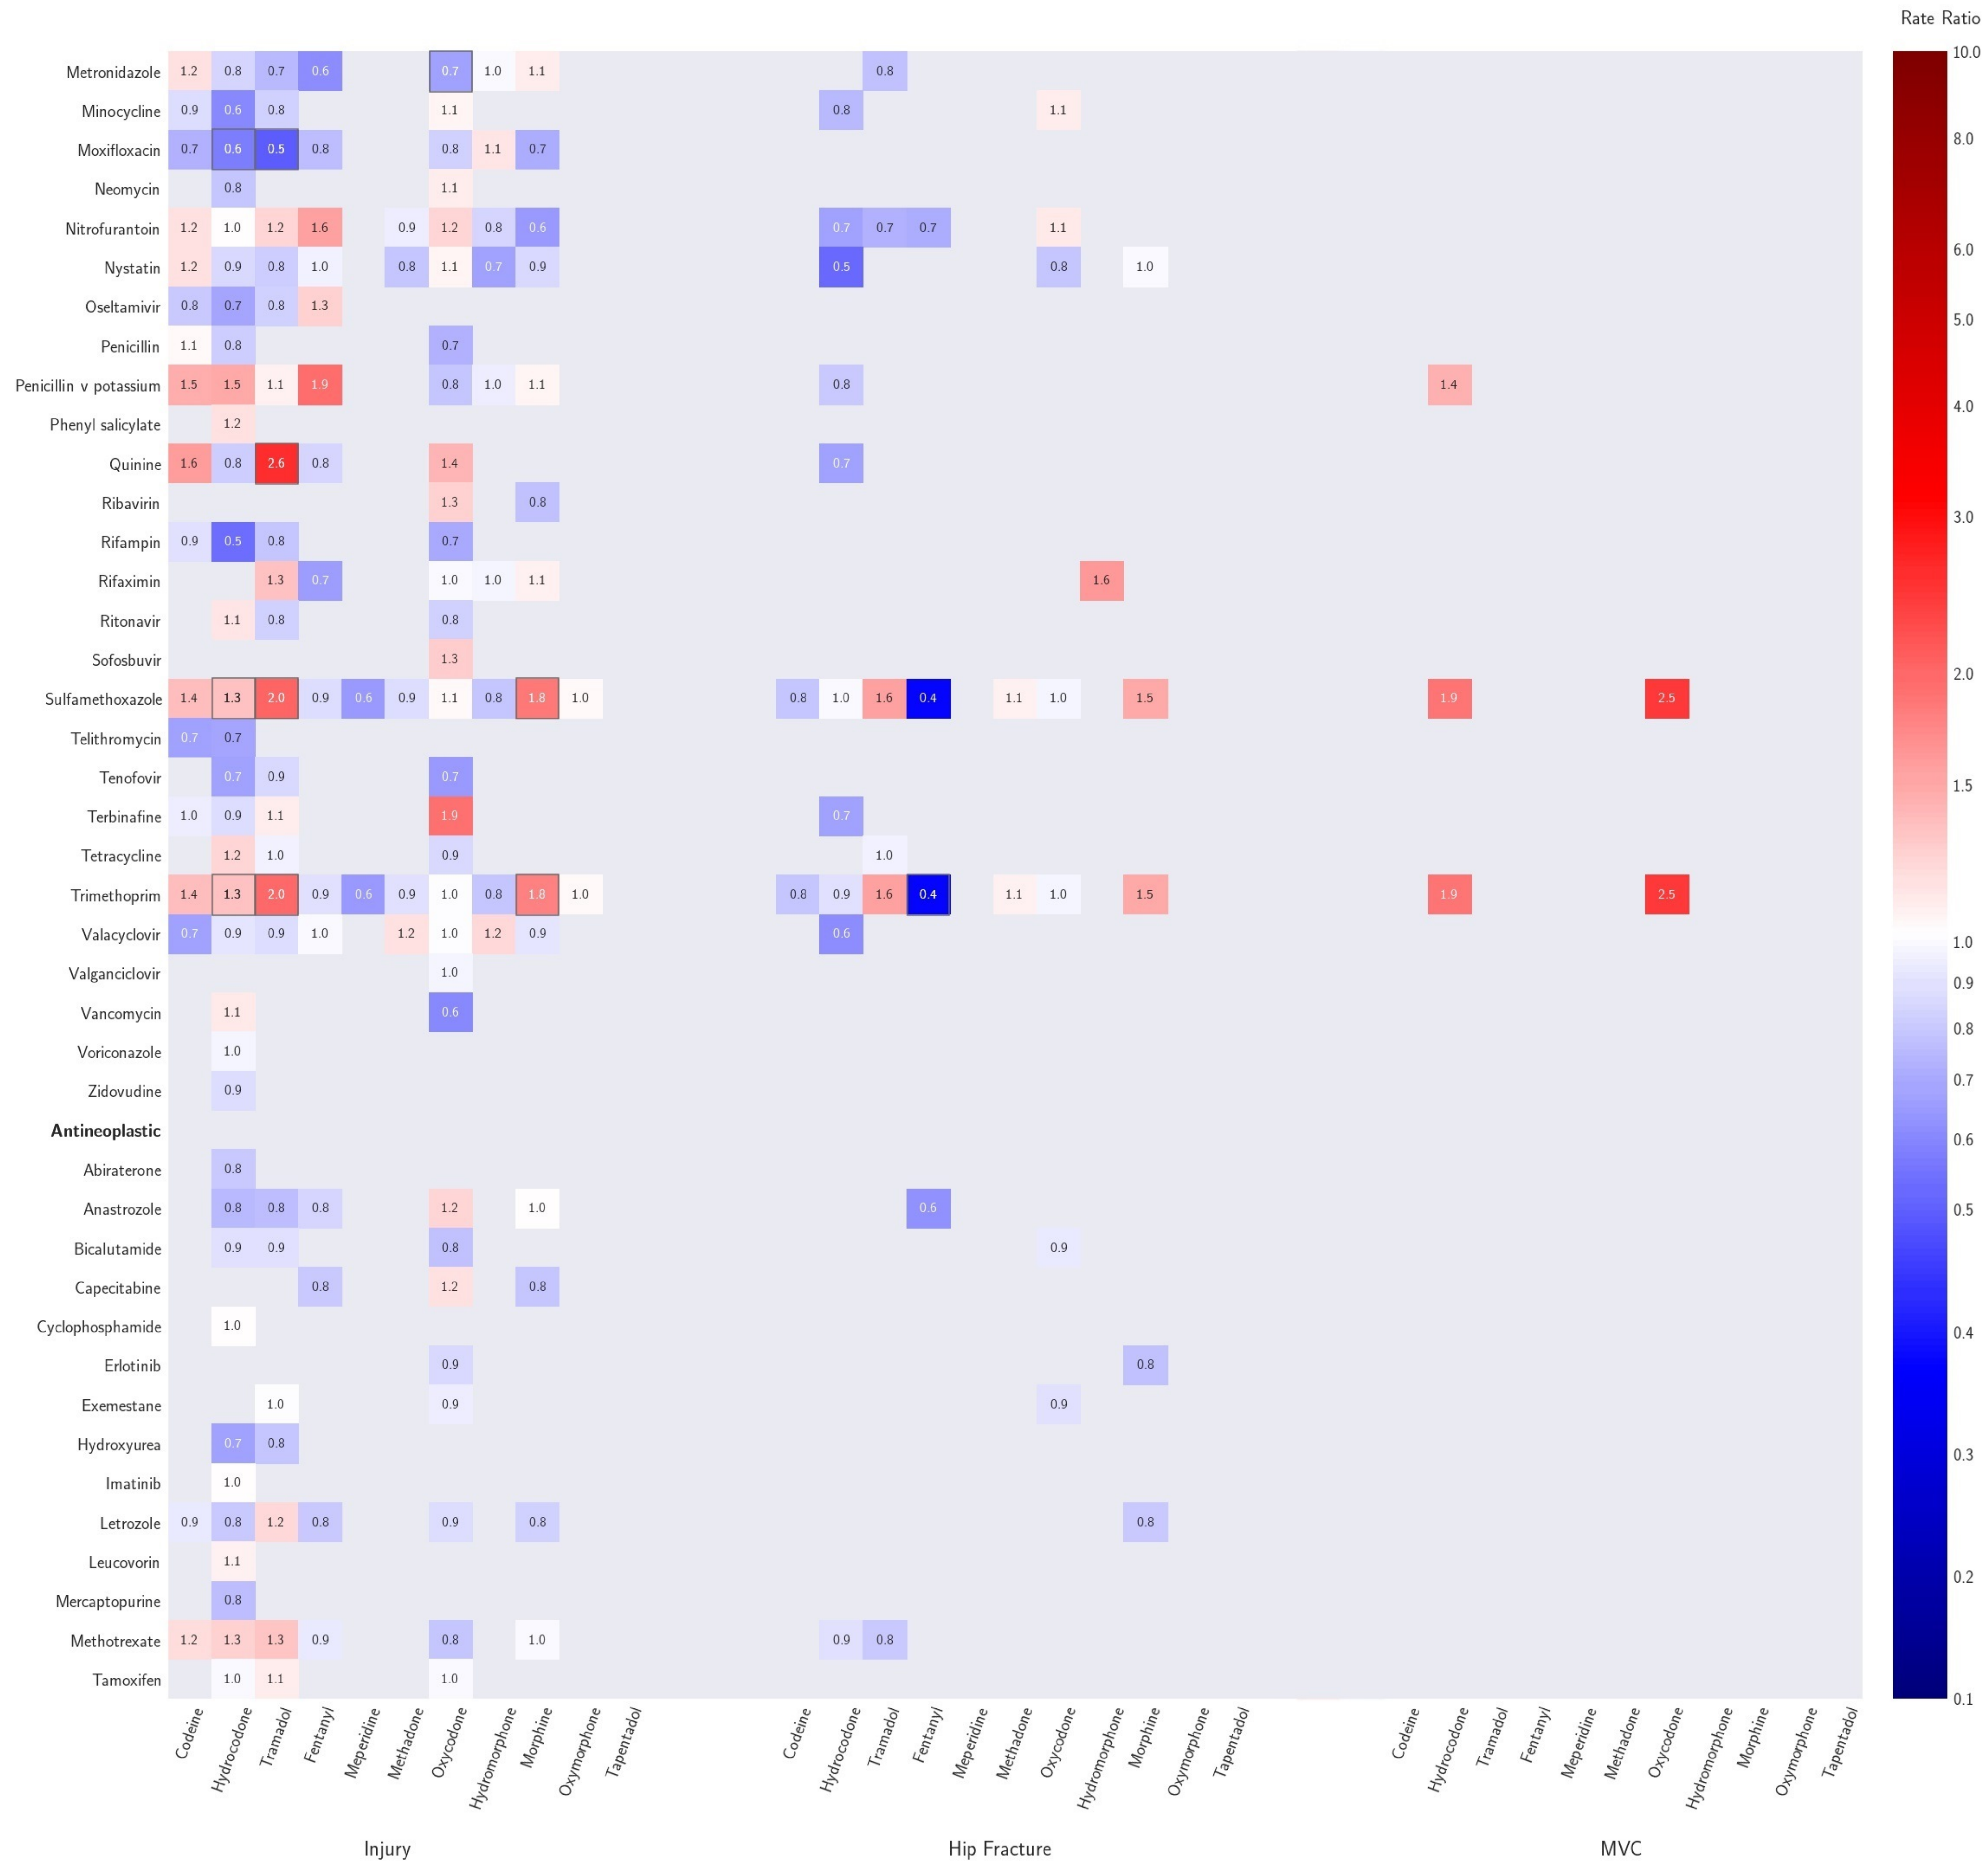

Rate Ratio

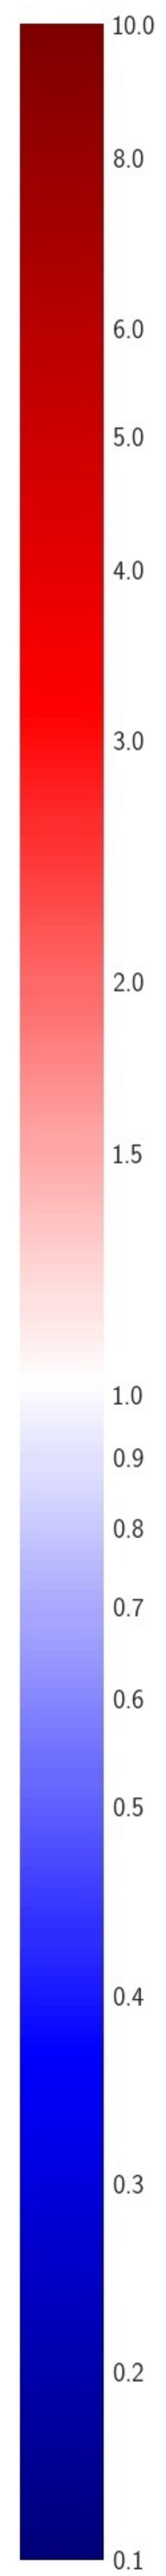

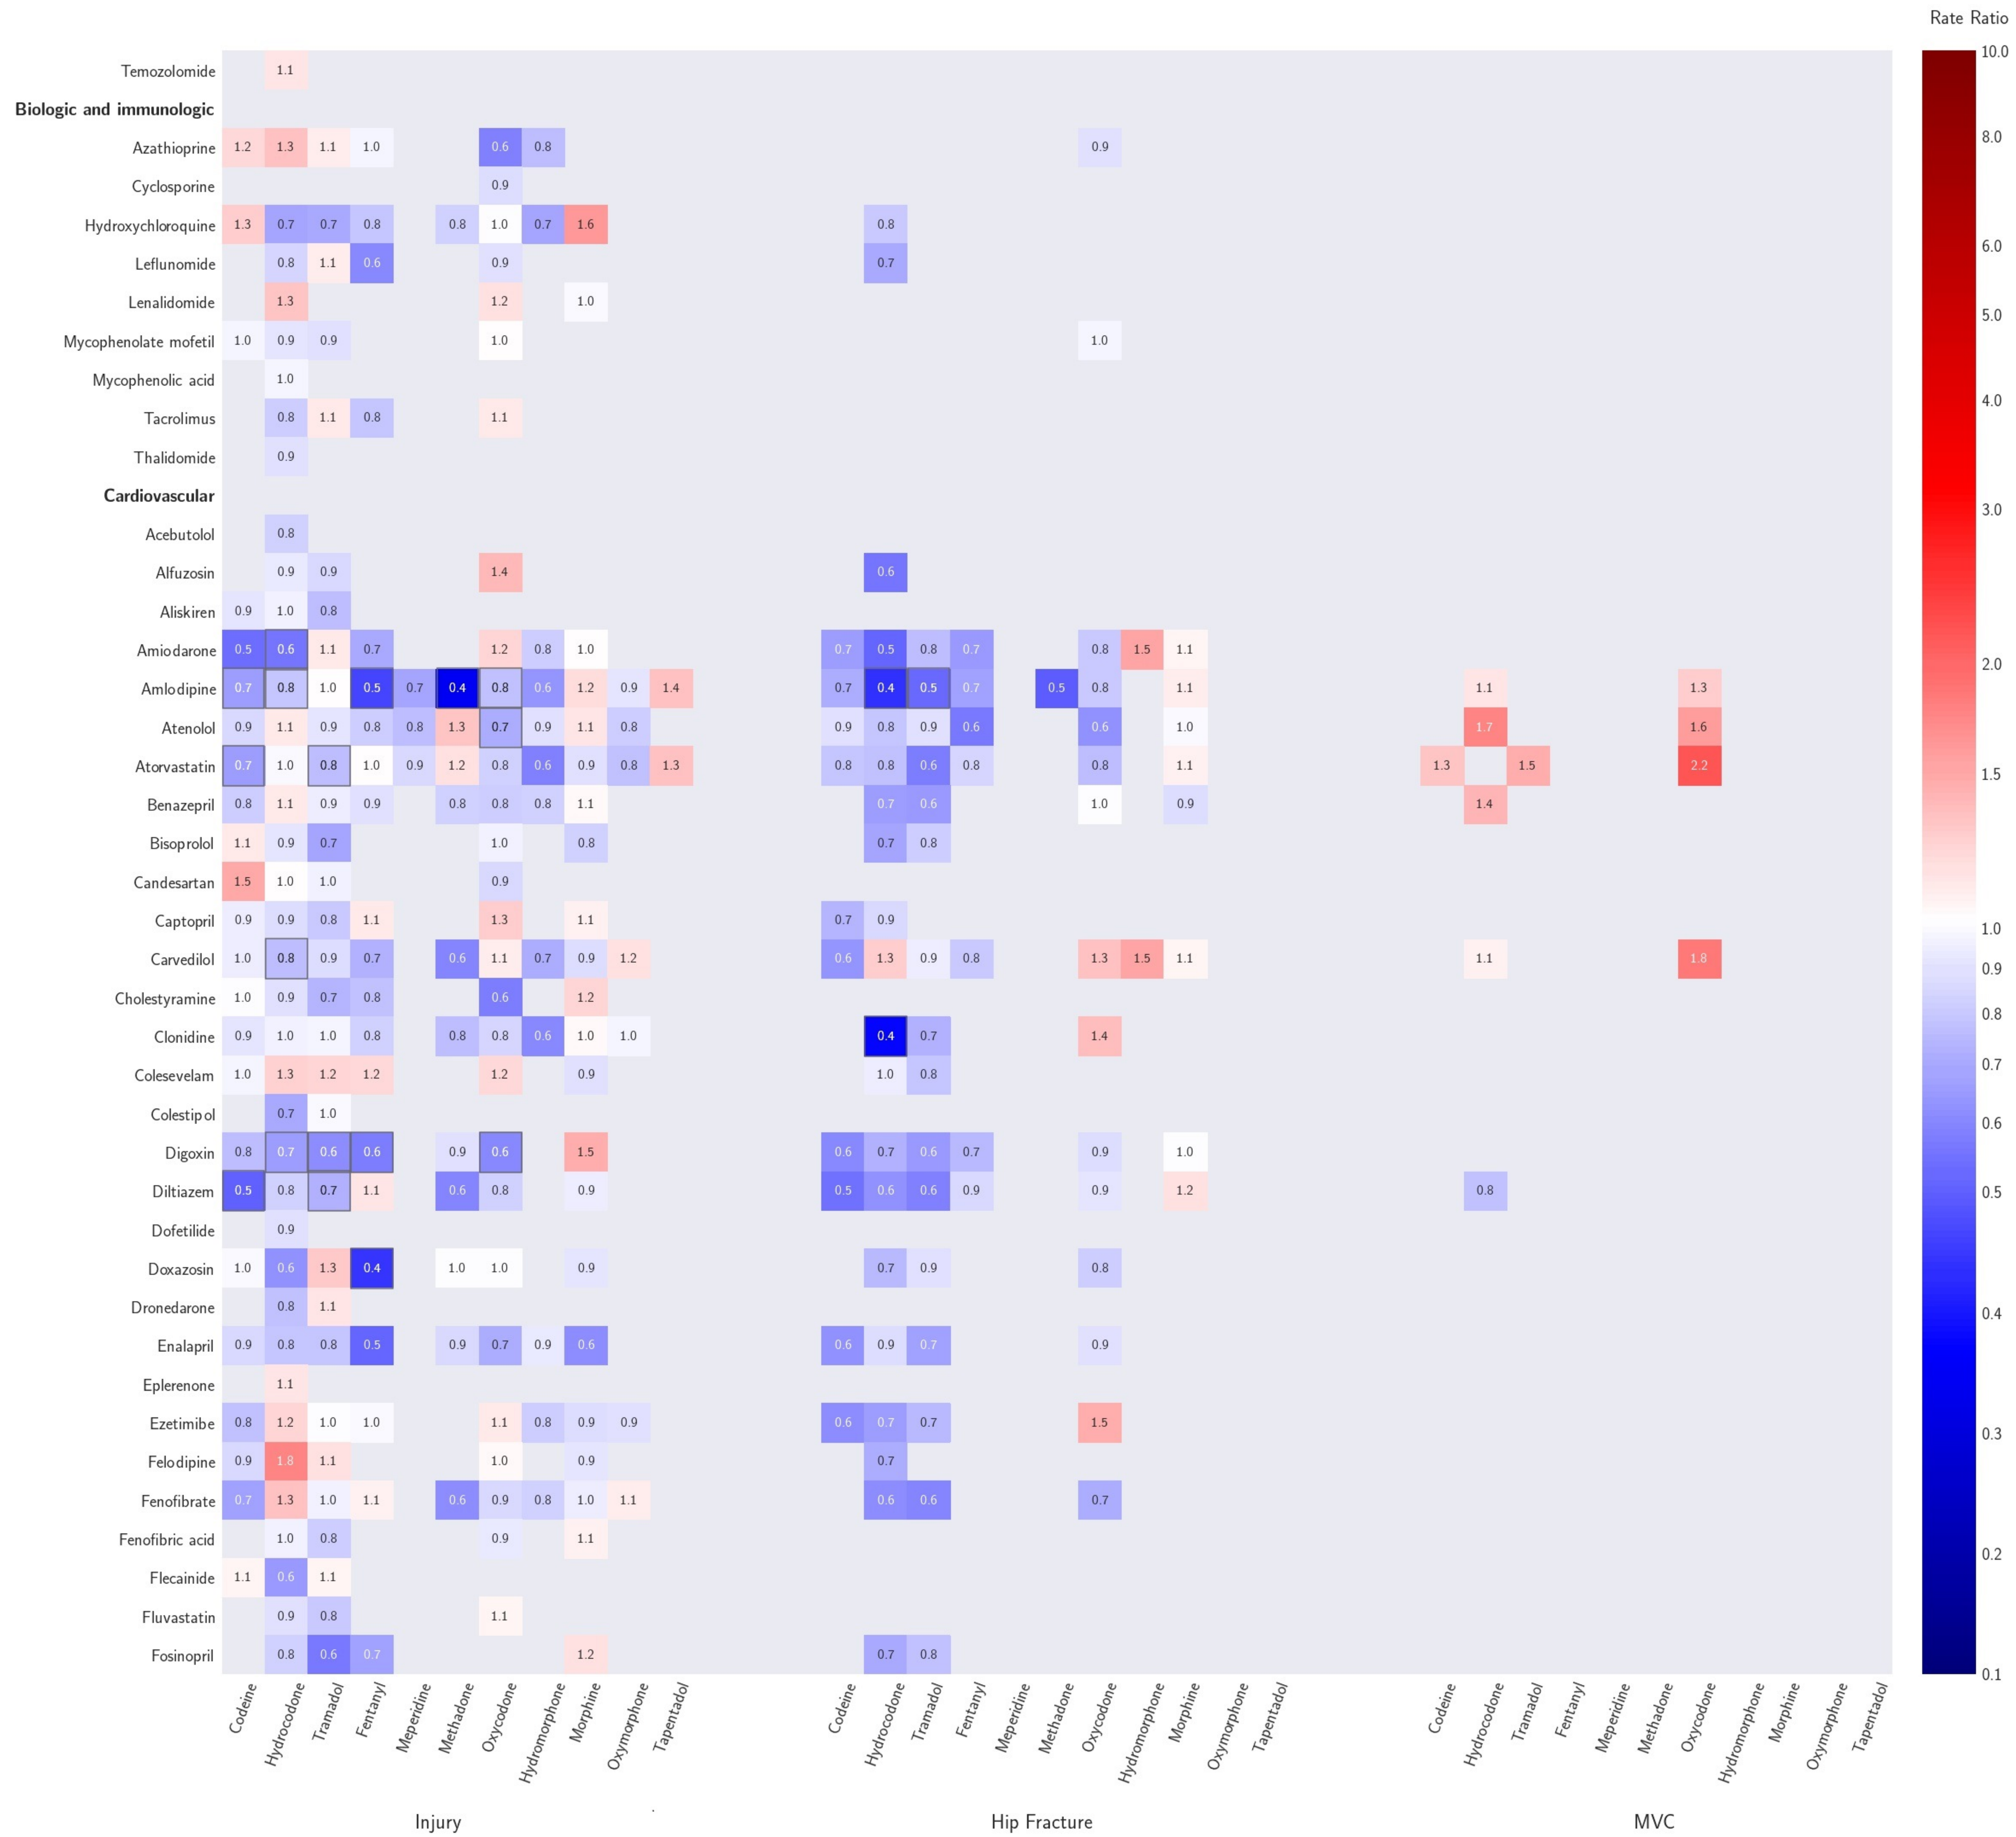

Rate Ratio

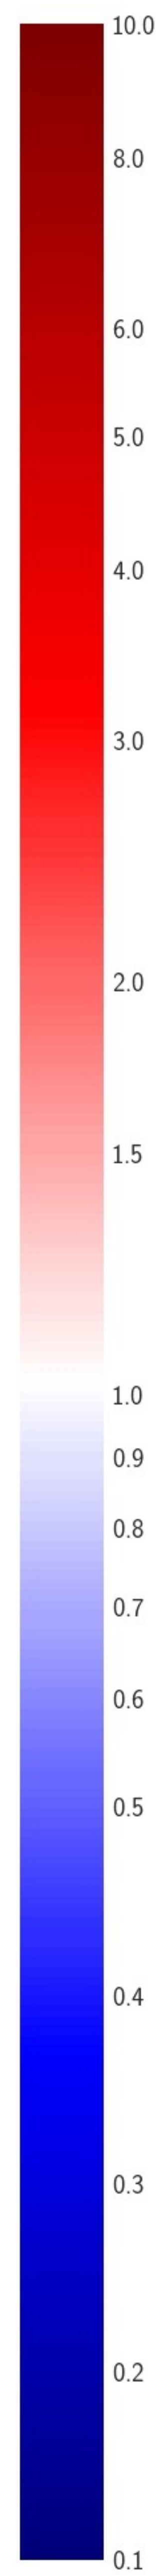

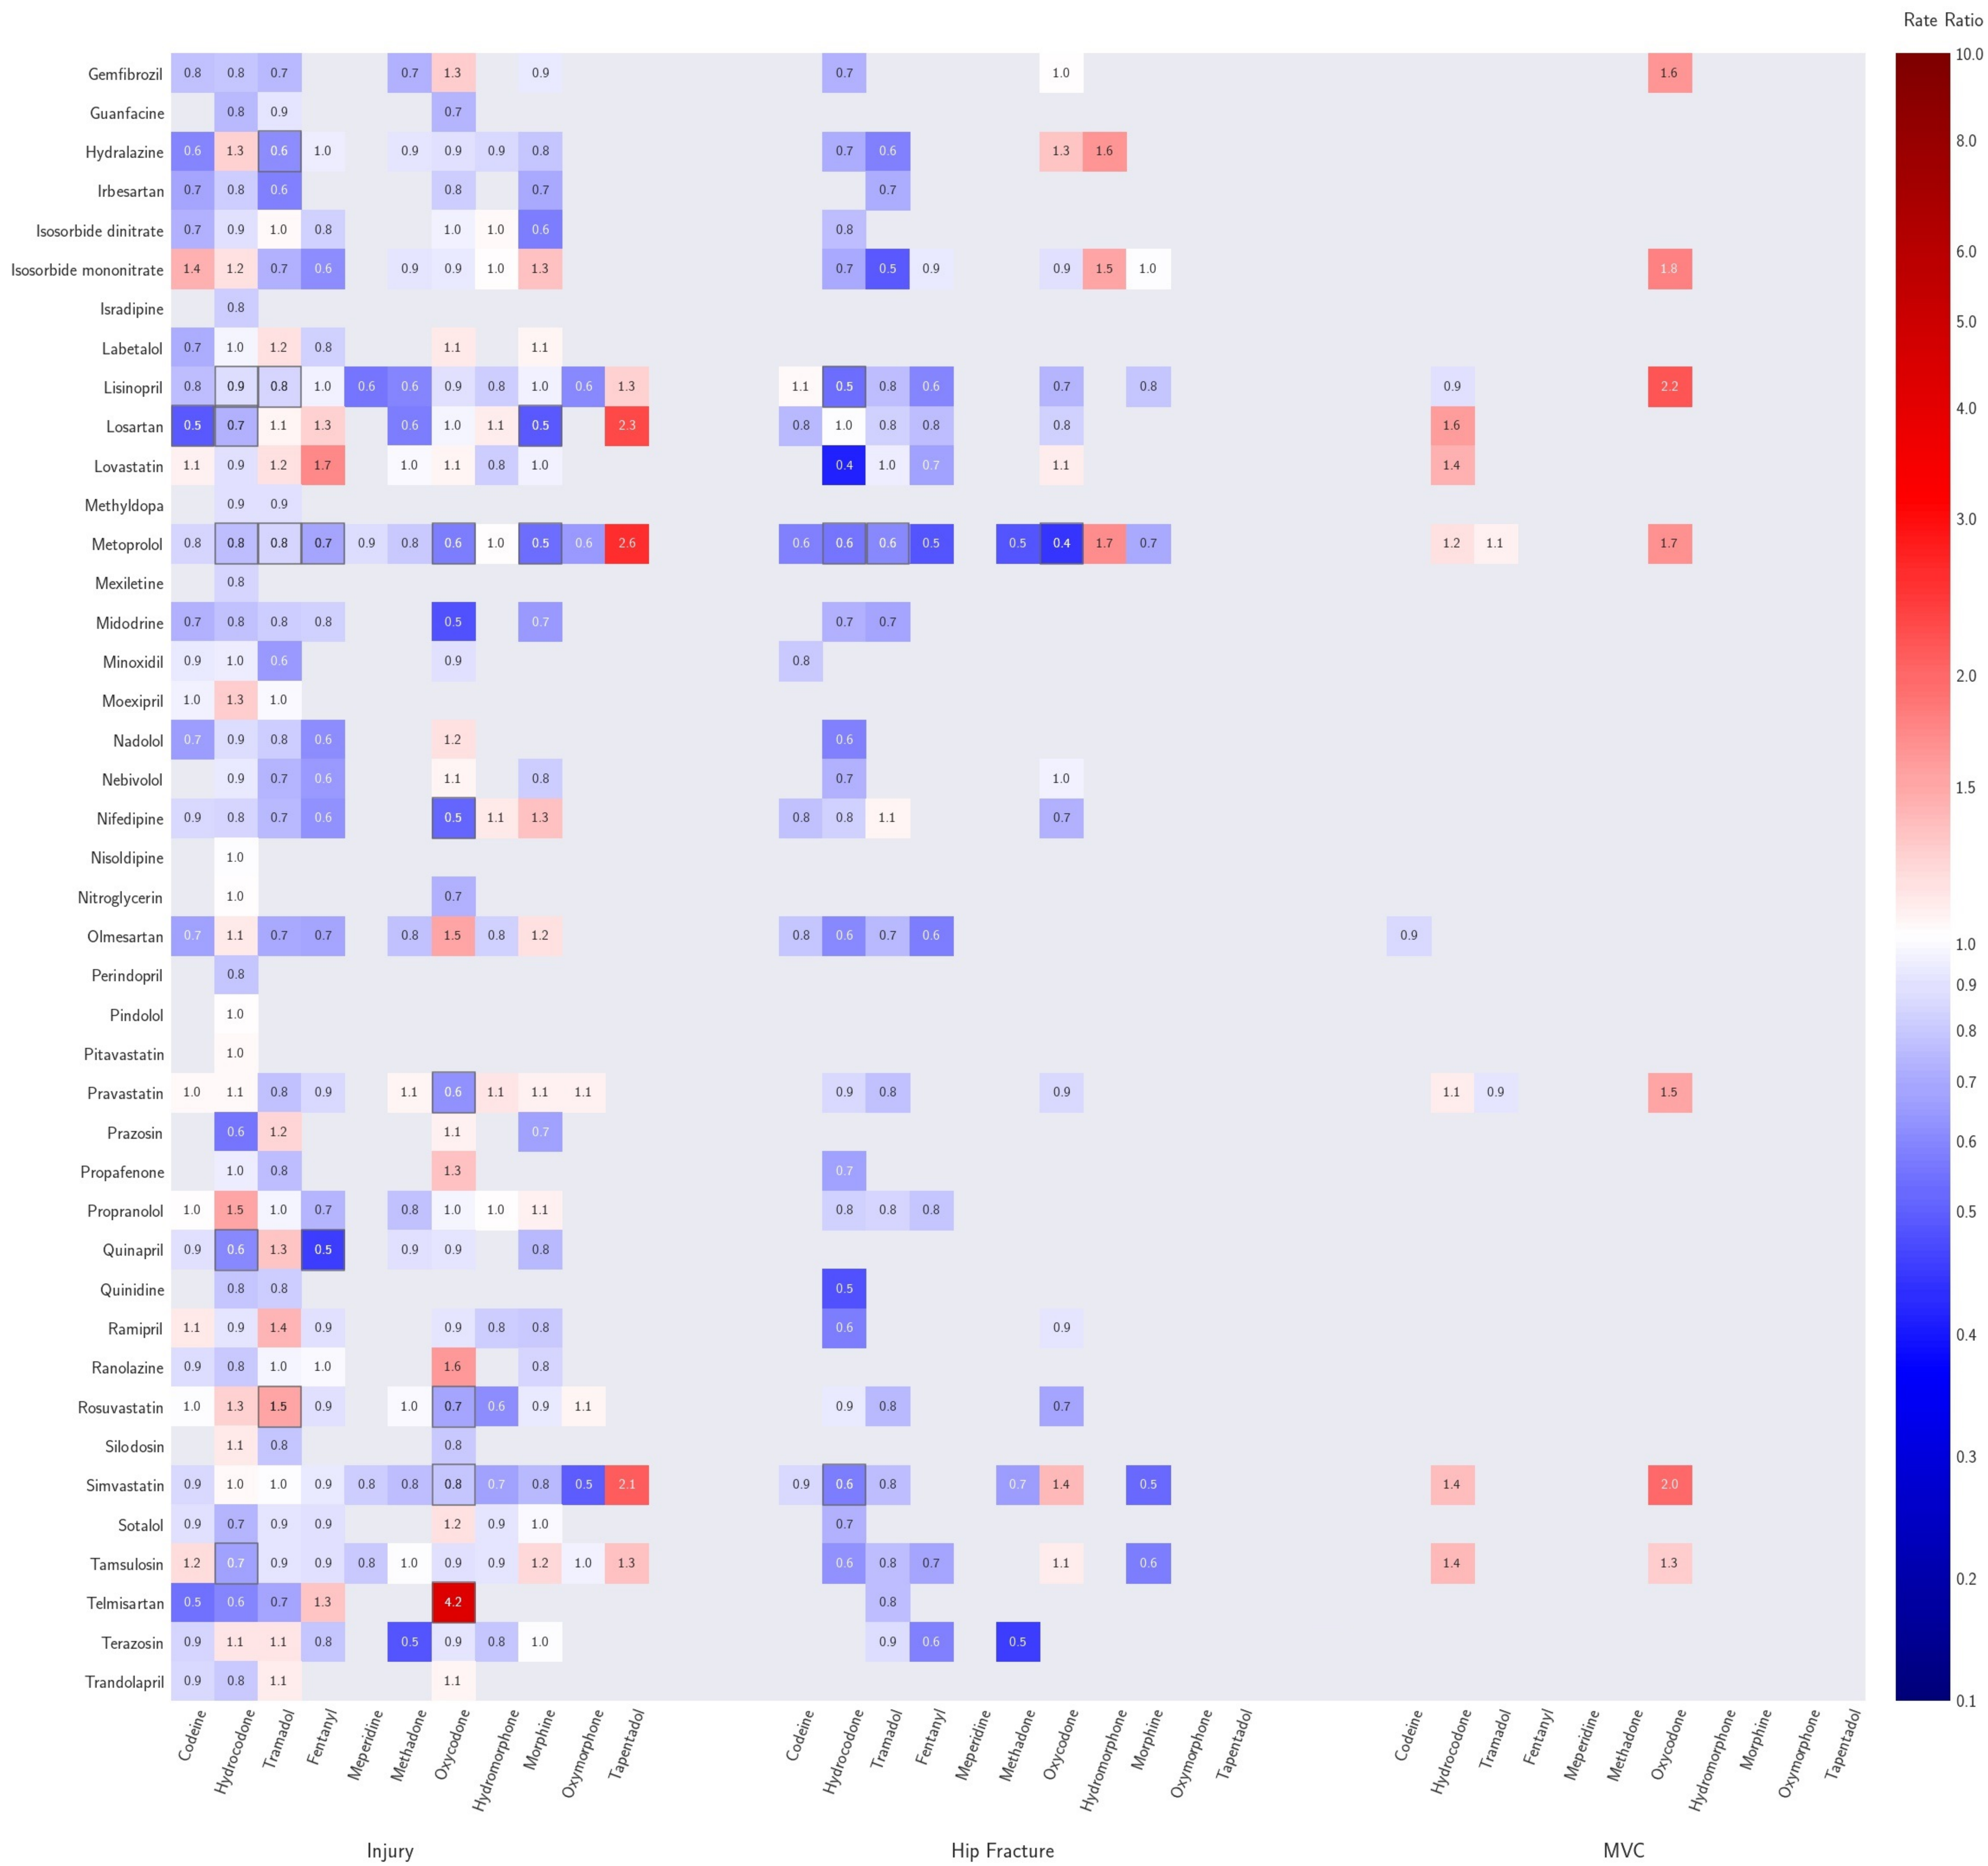

Rate Ratio

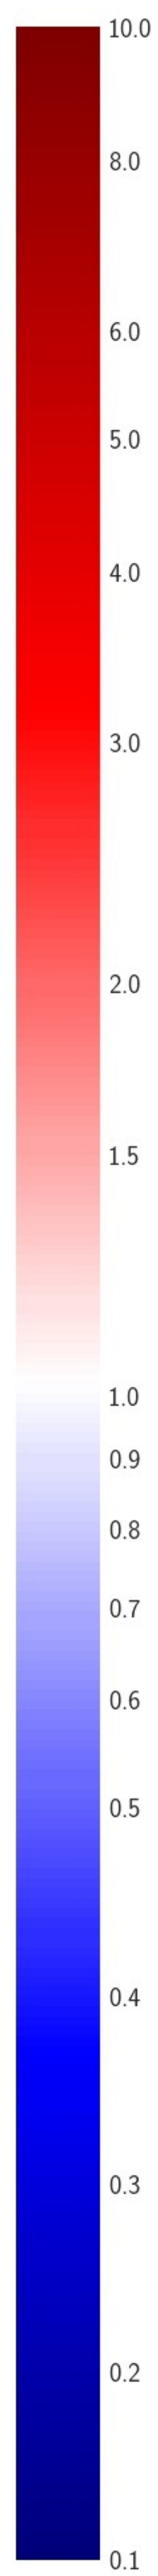

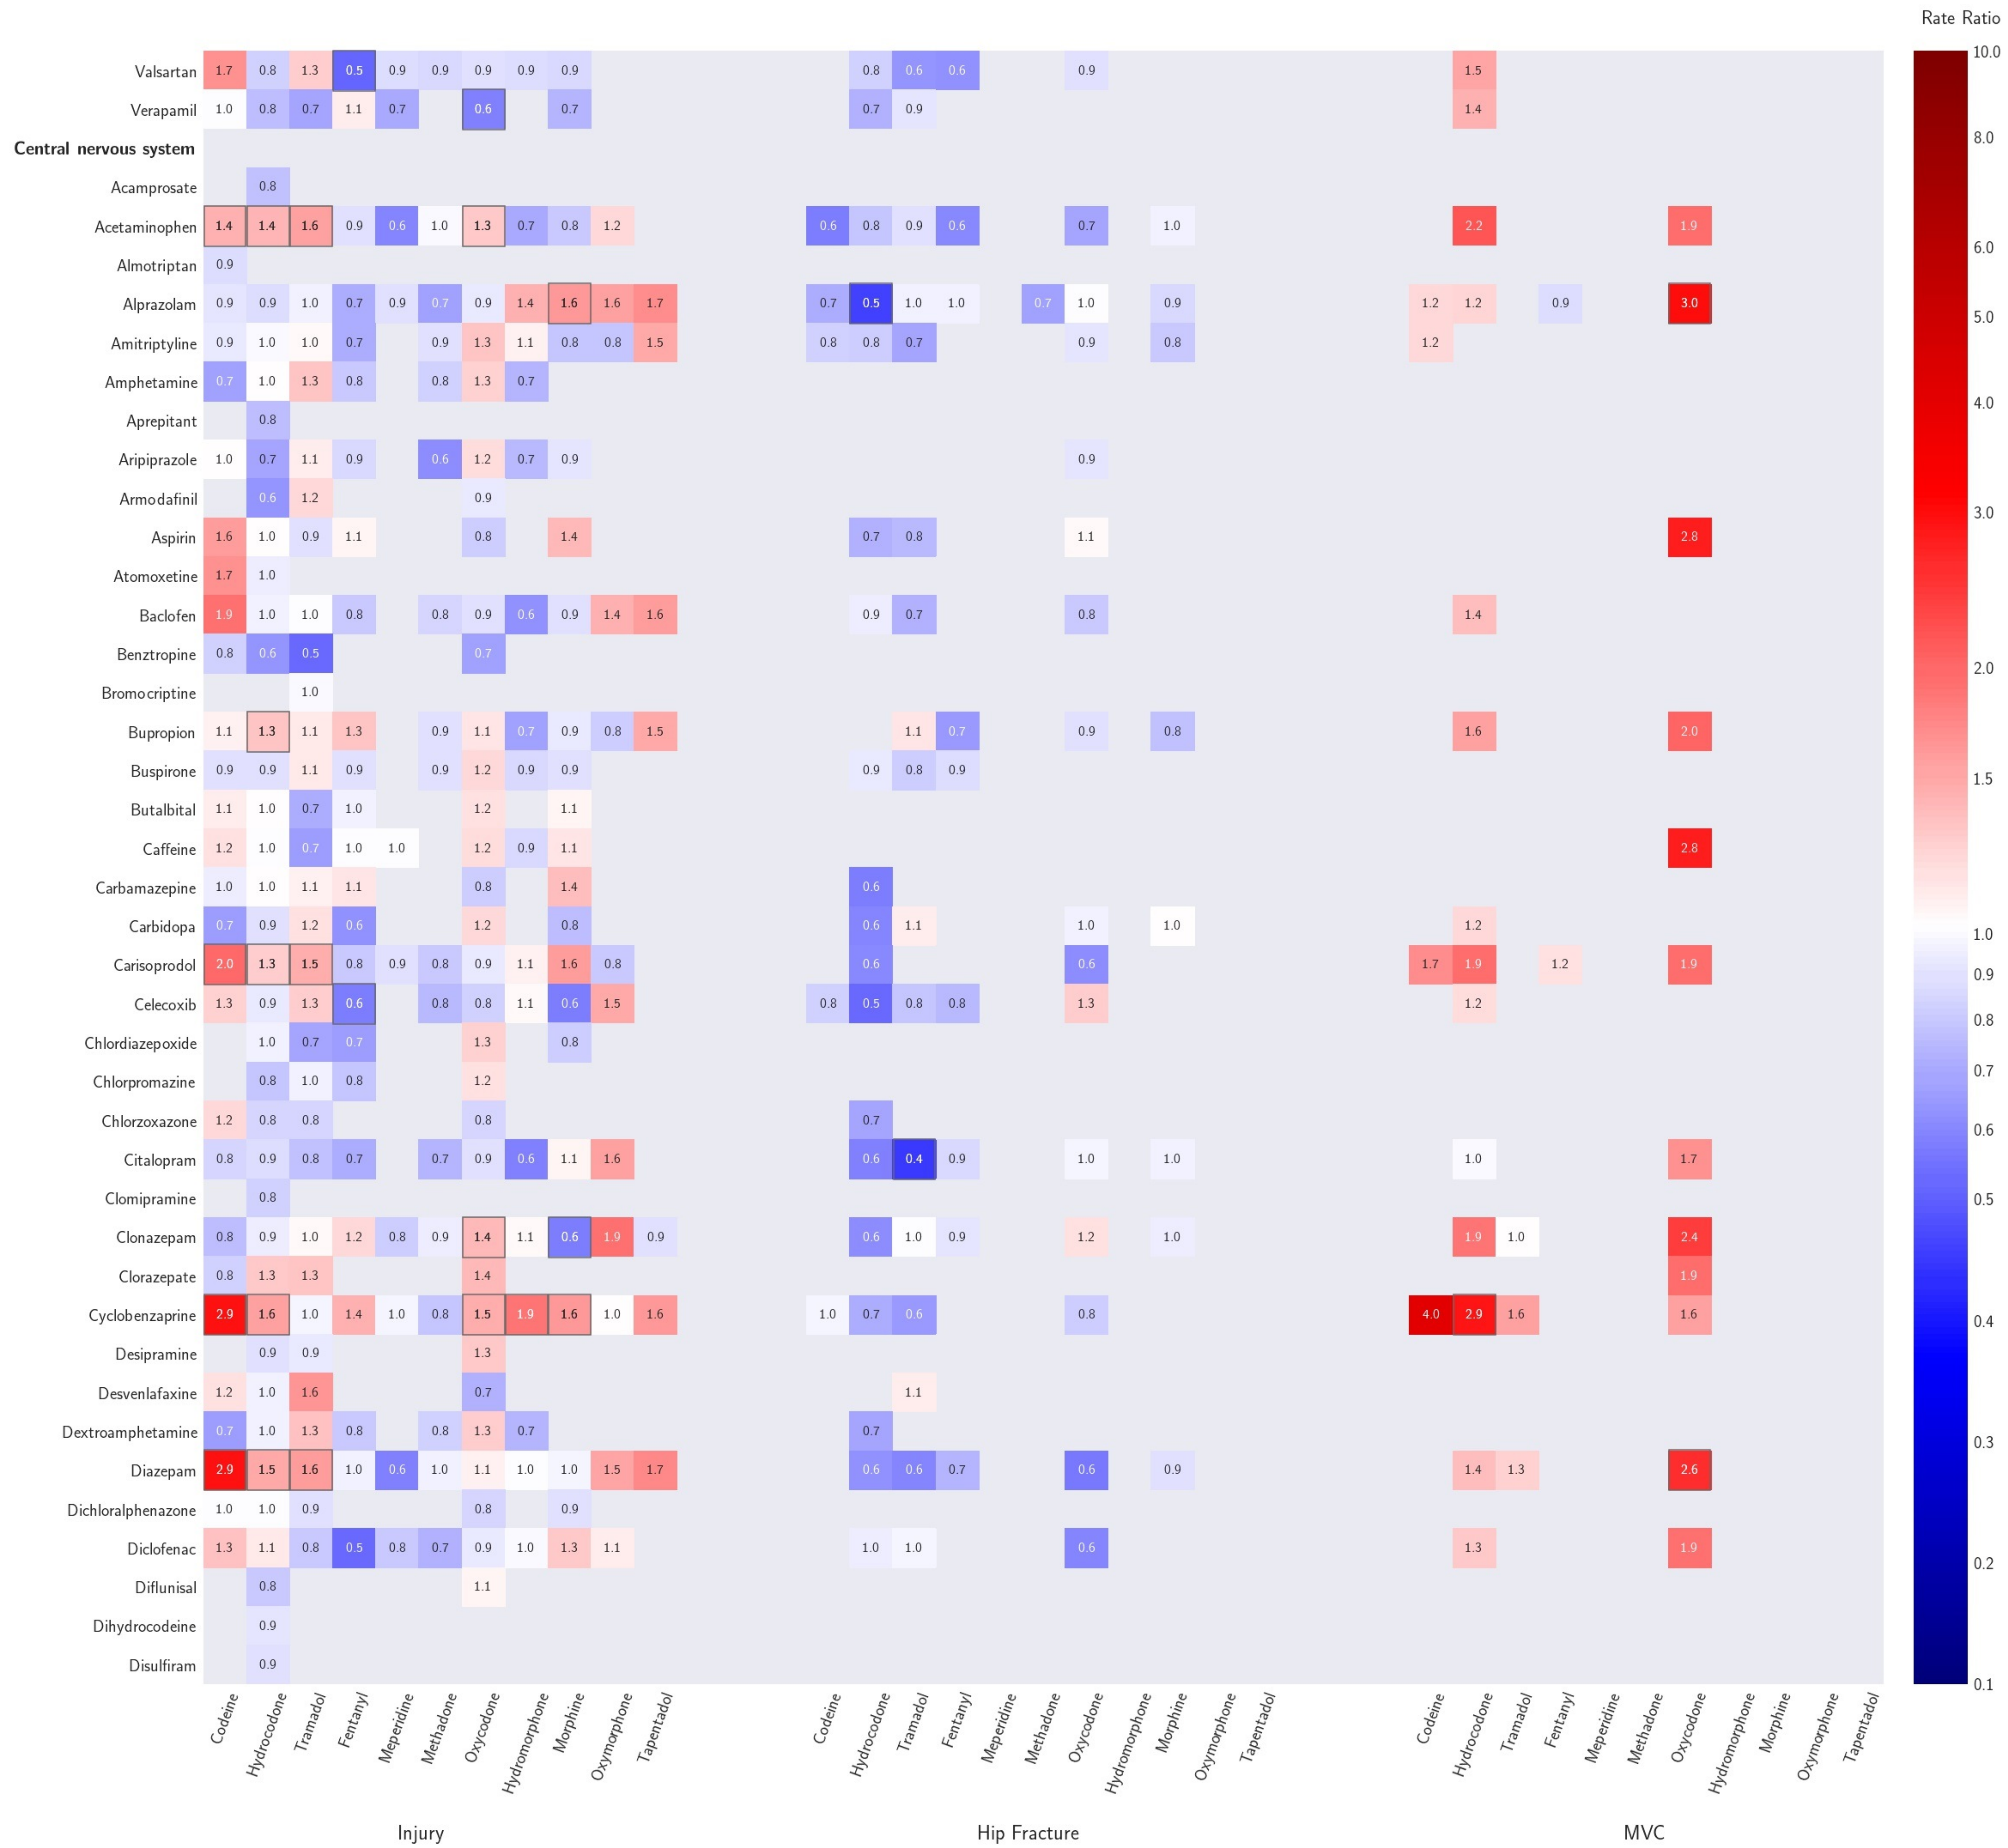

Rate Ratio



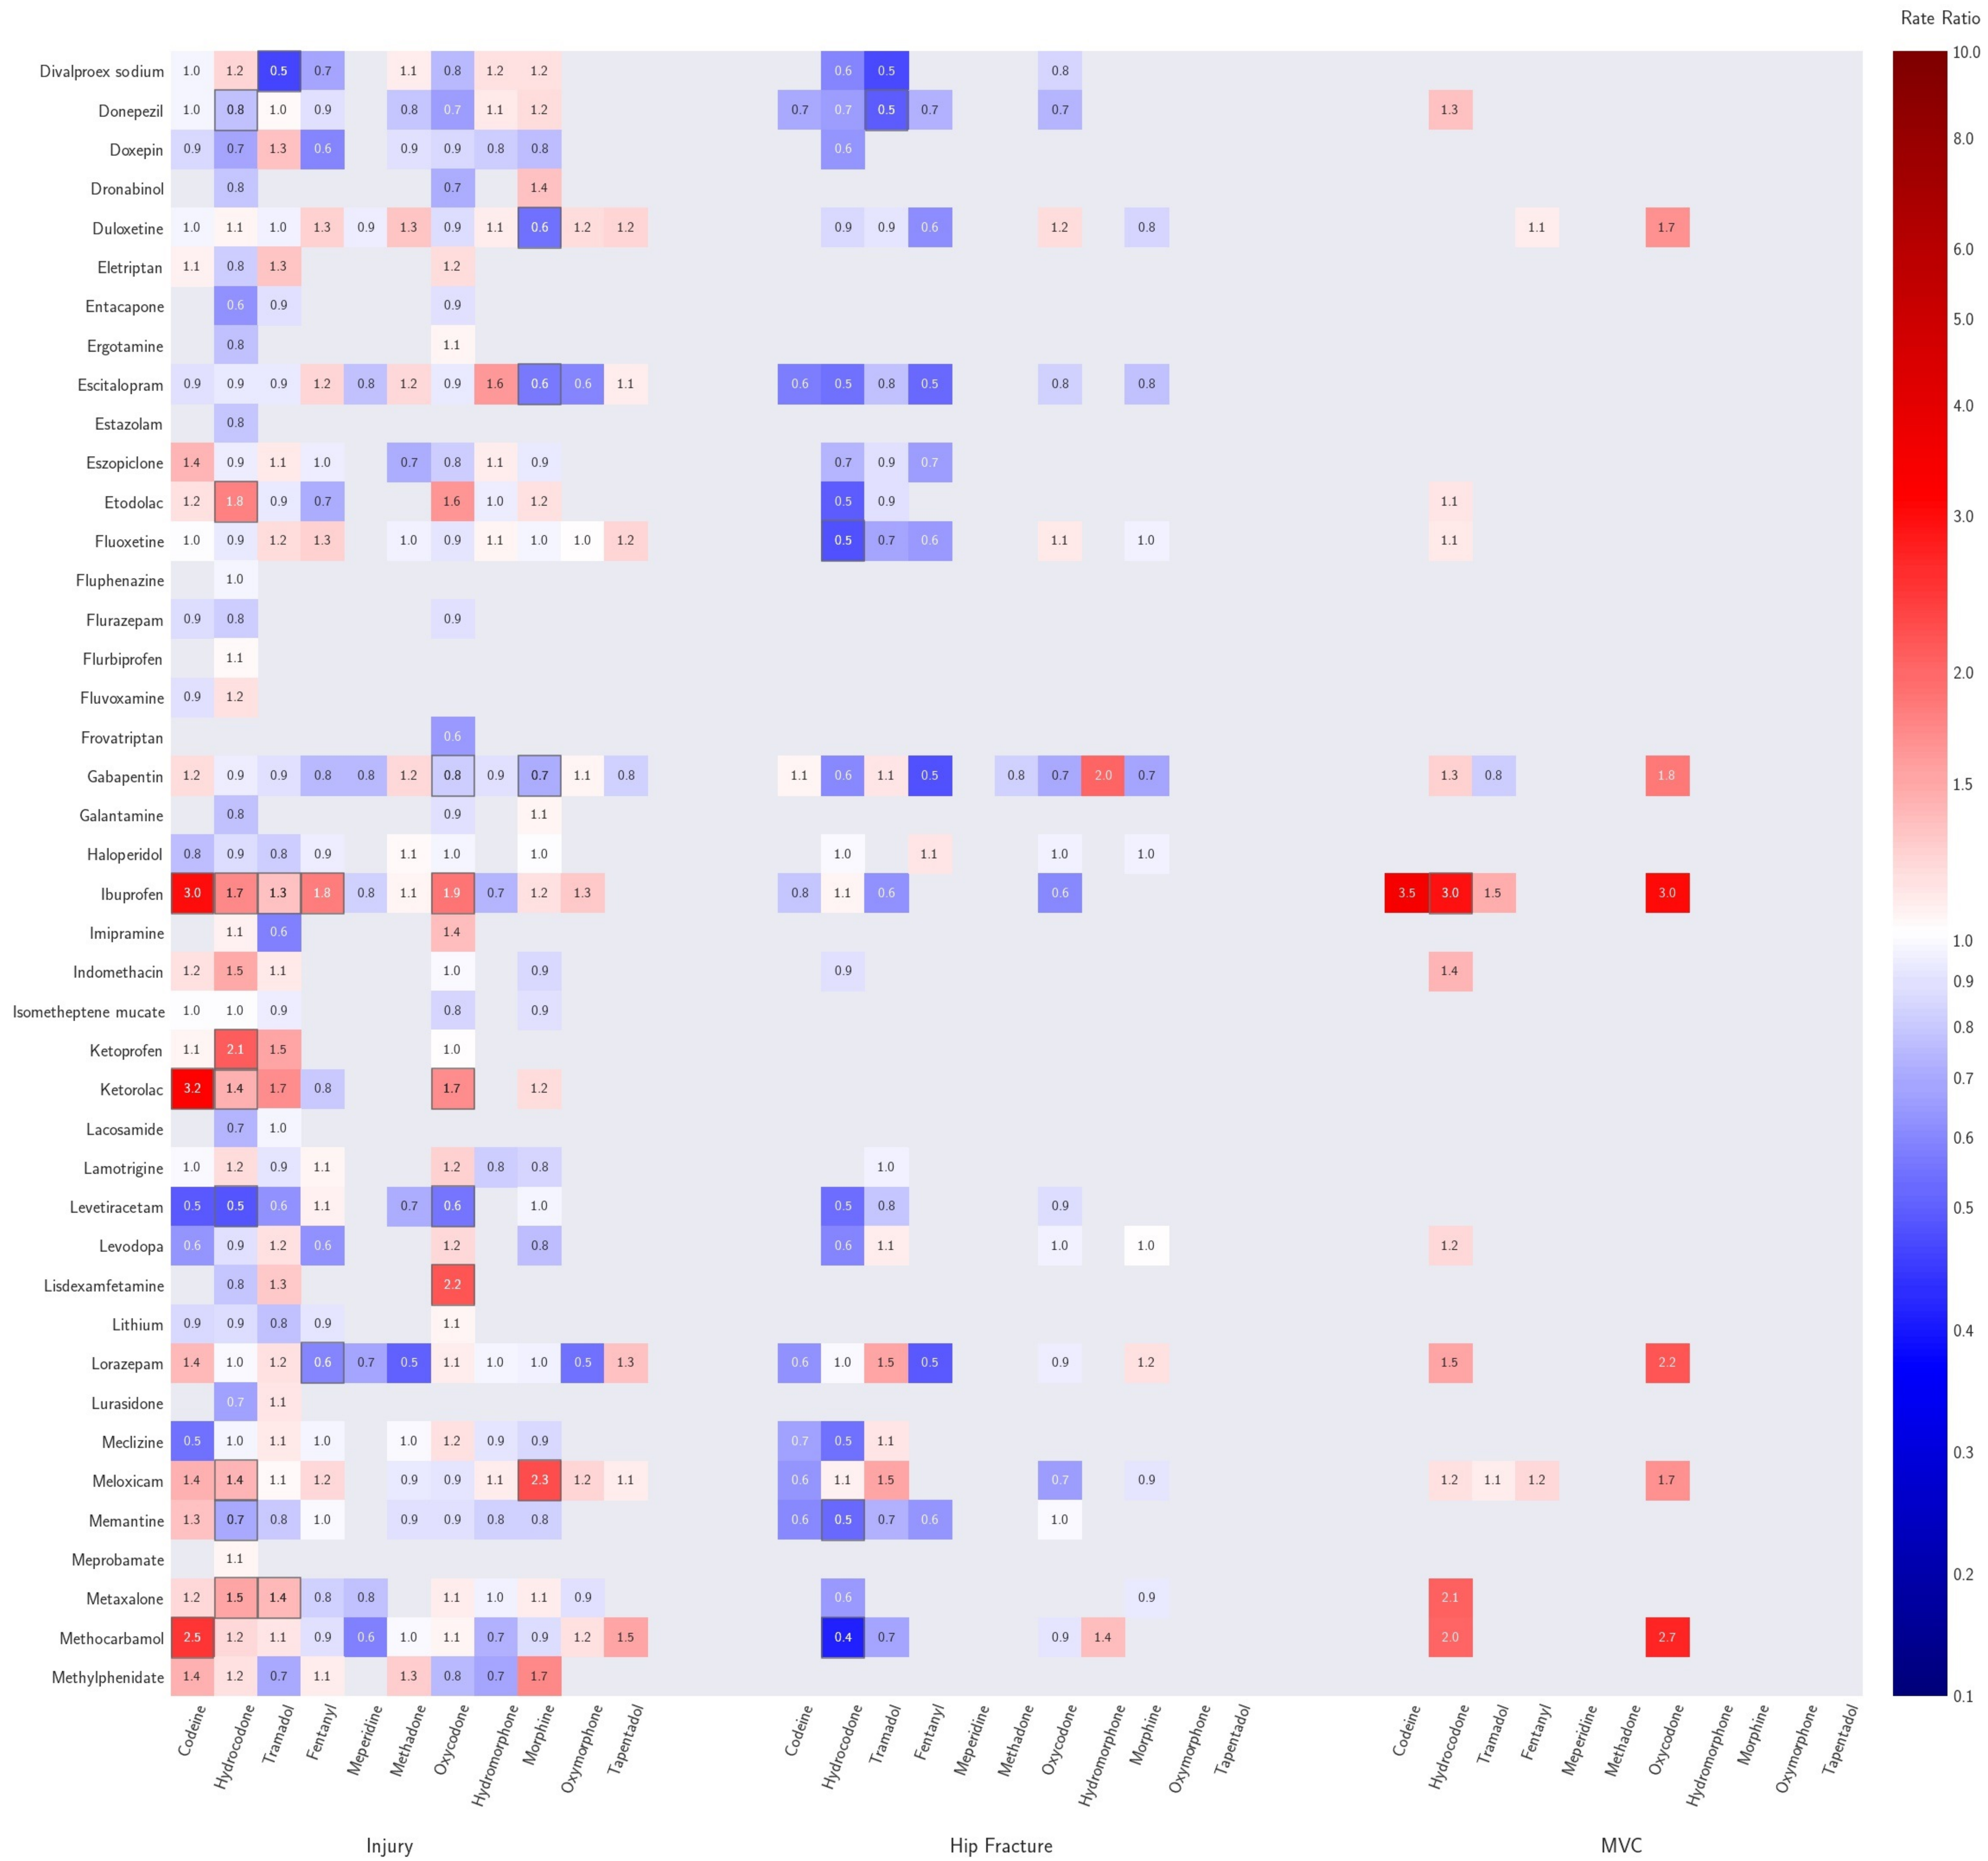

Rate Ratio

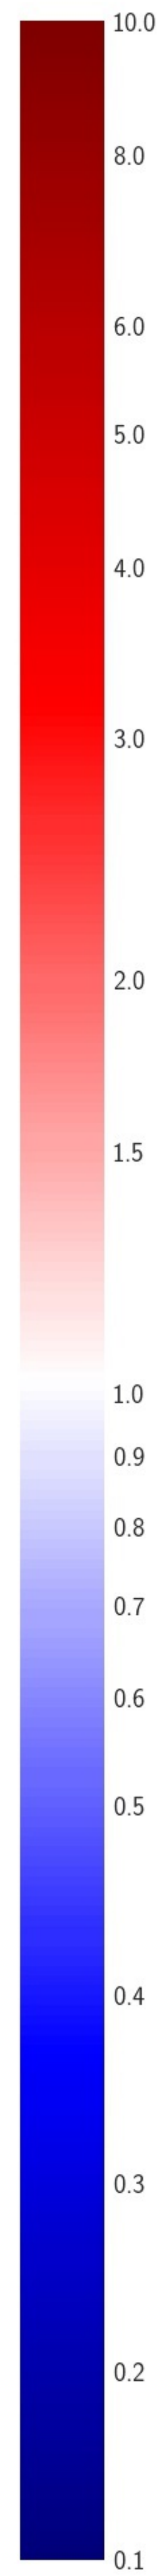



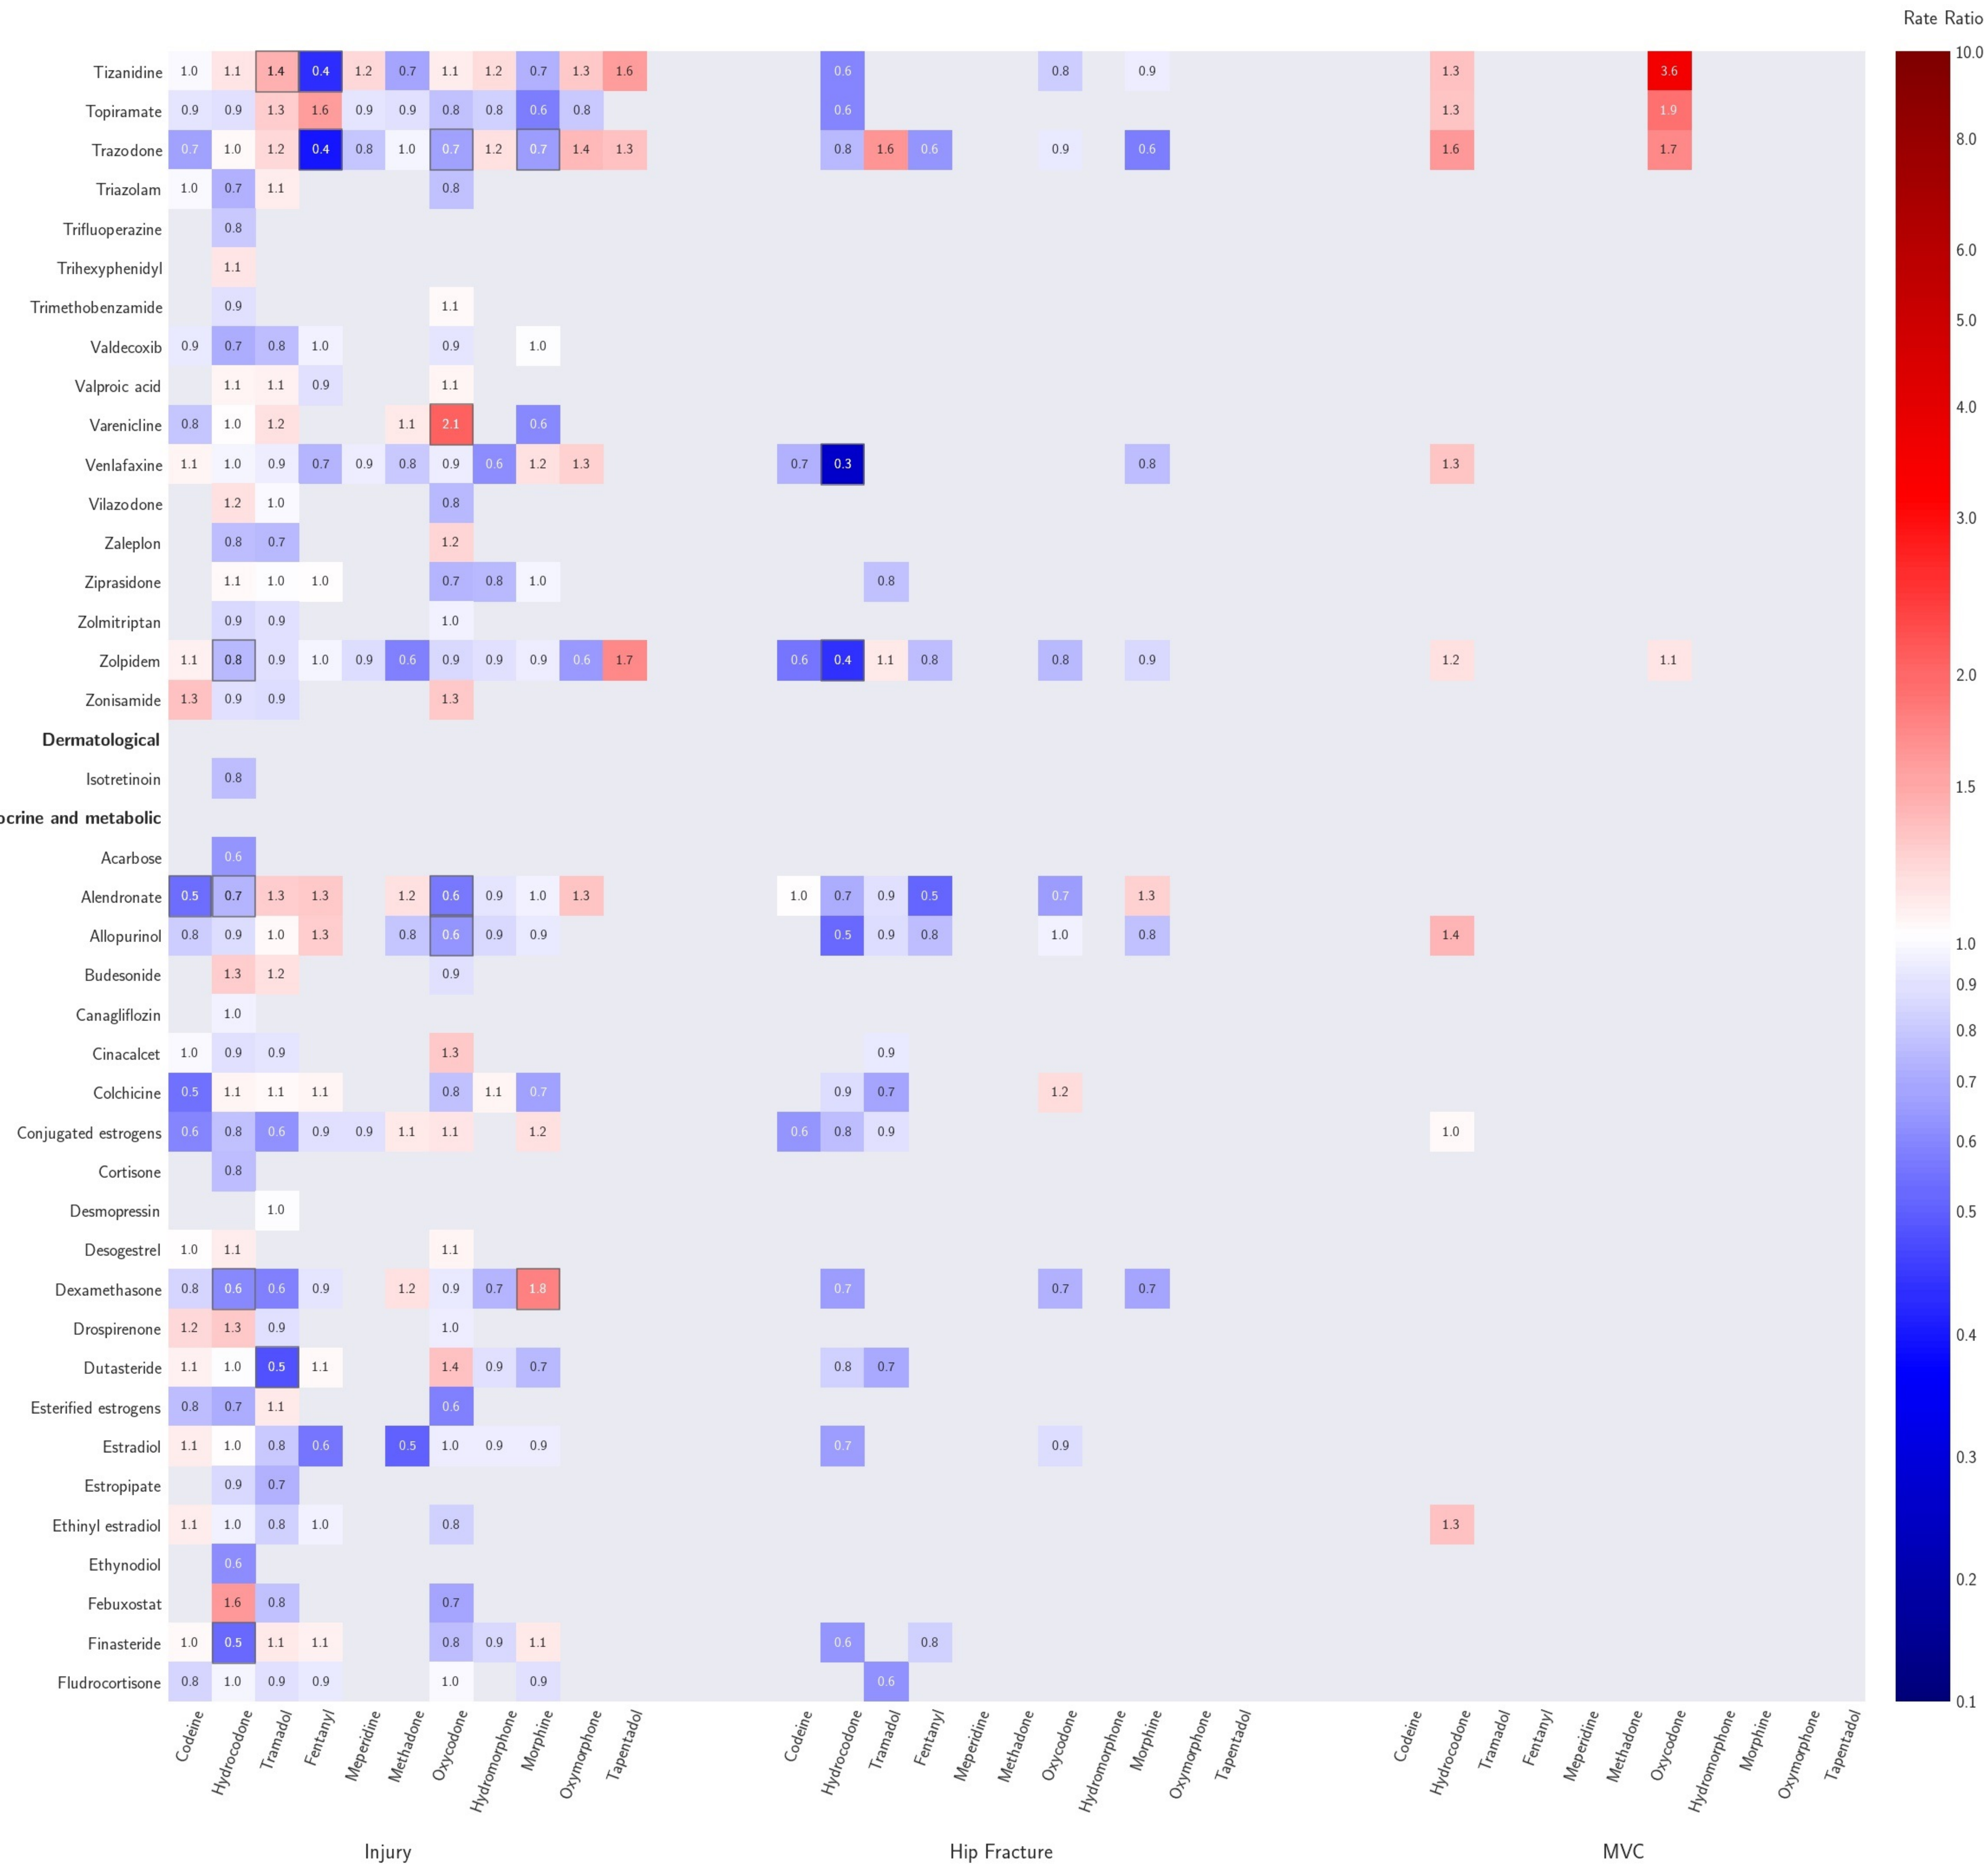

Rate Ratio









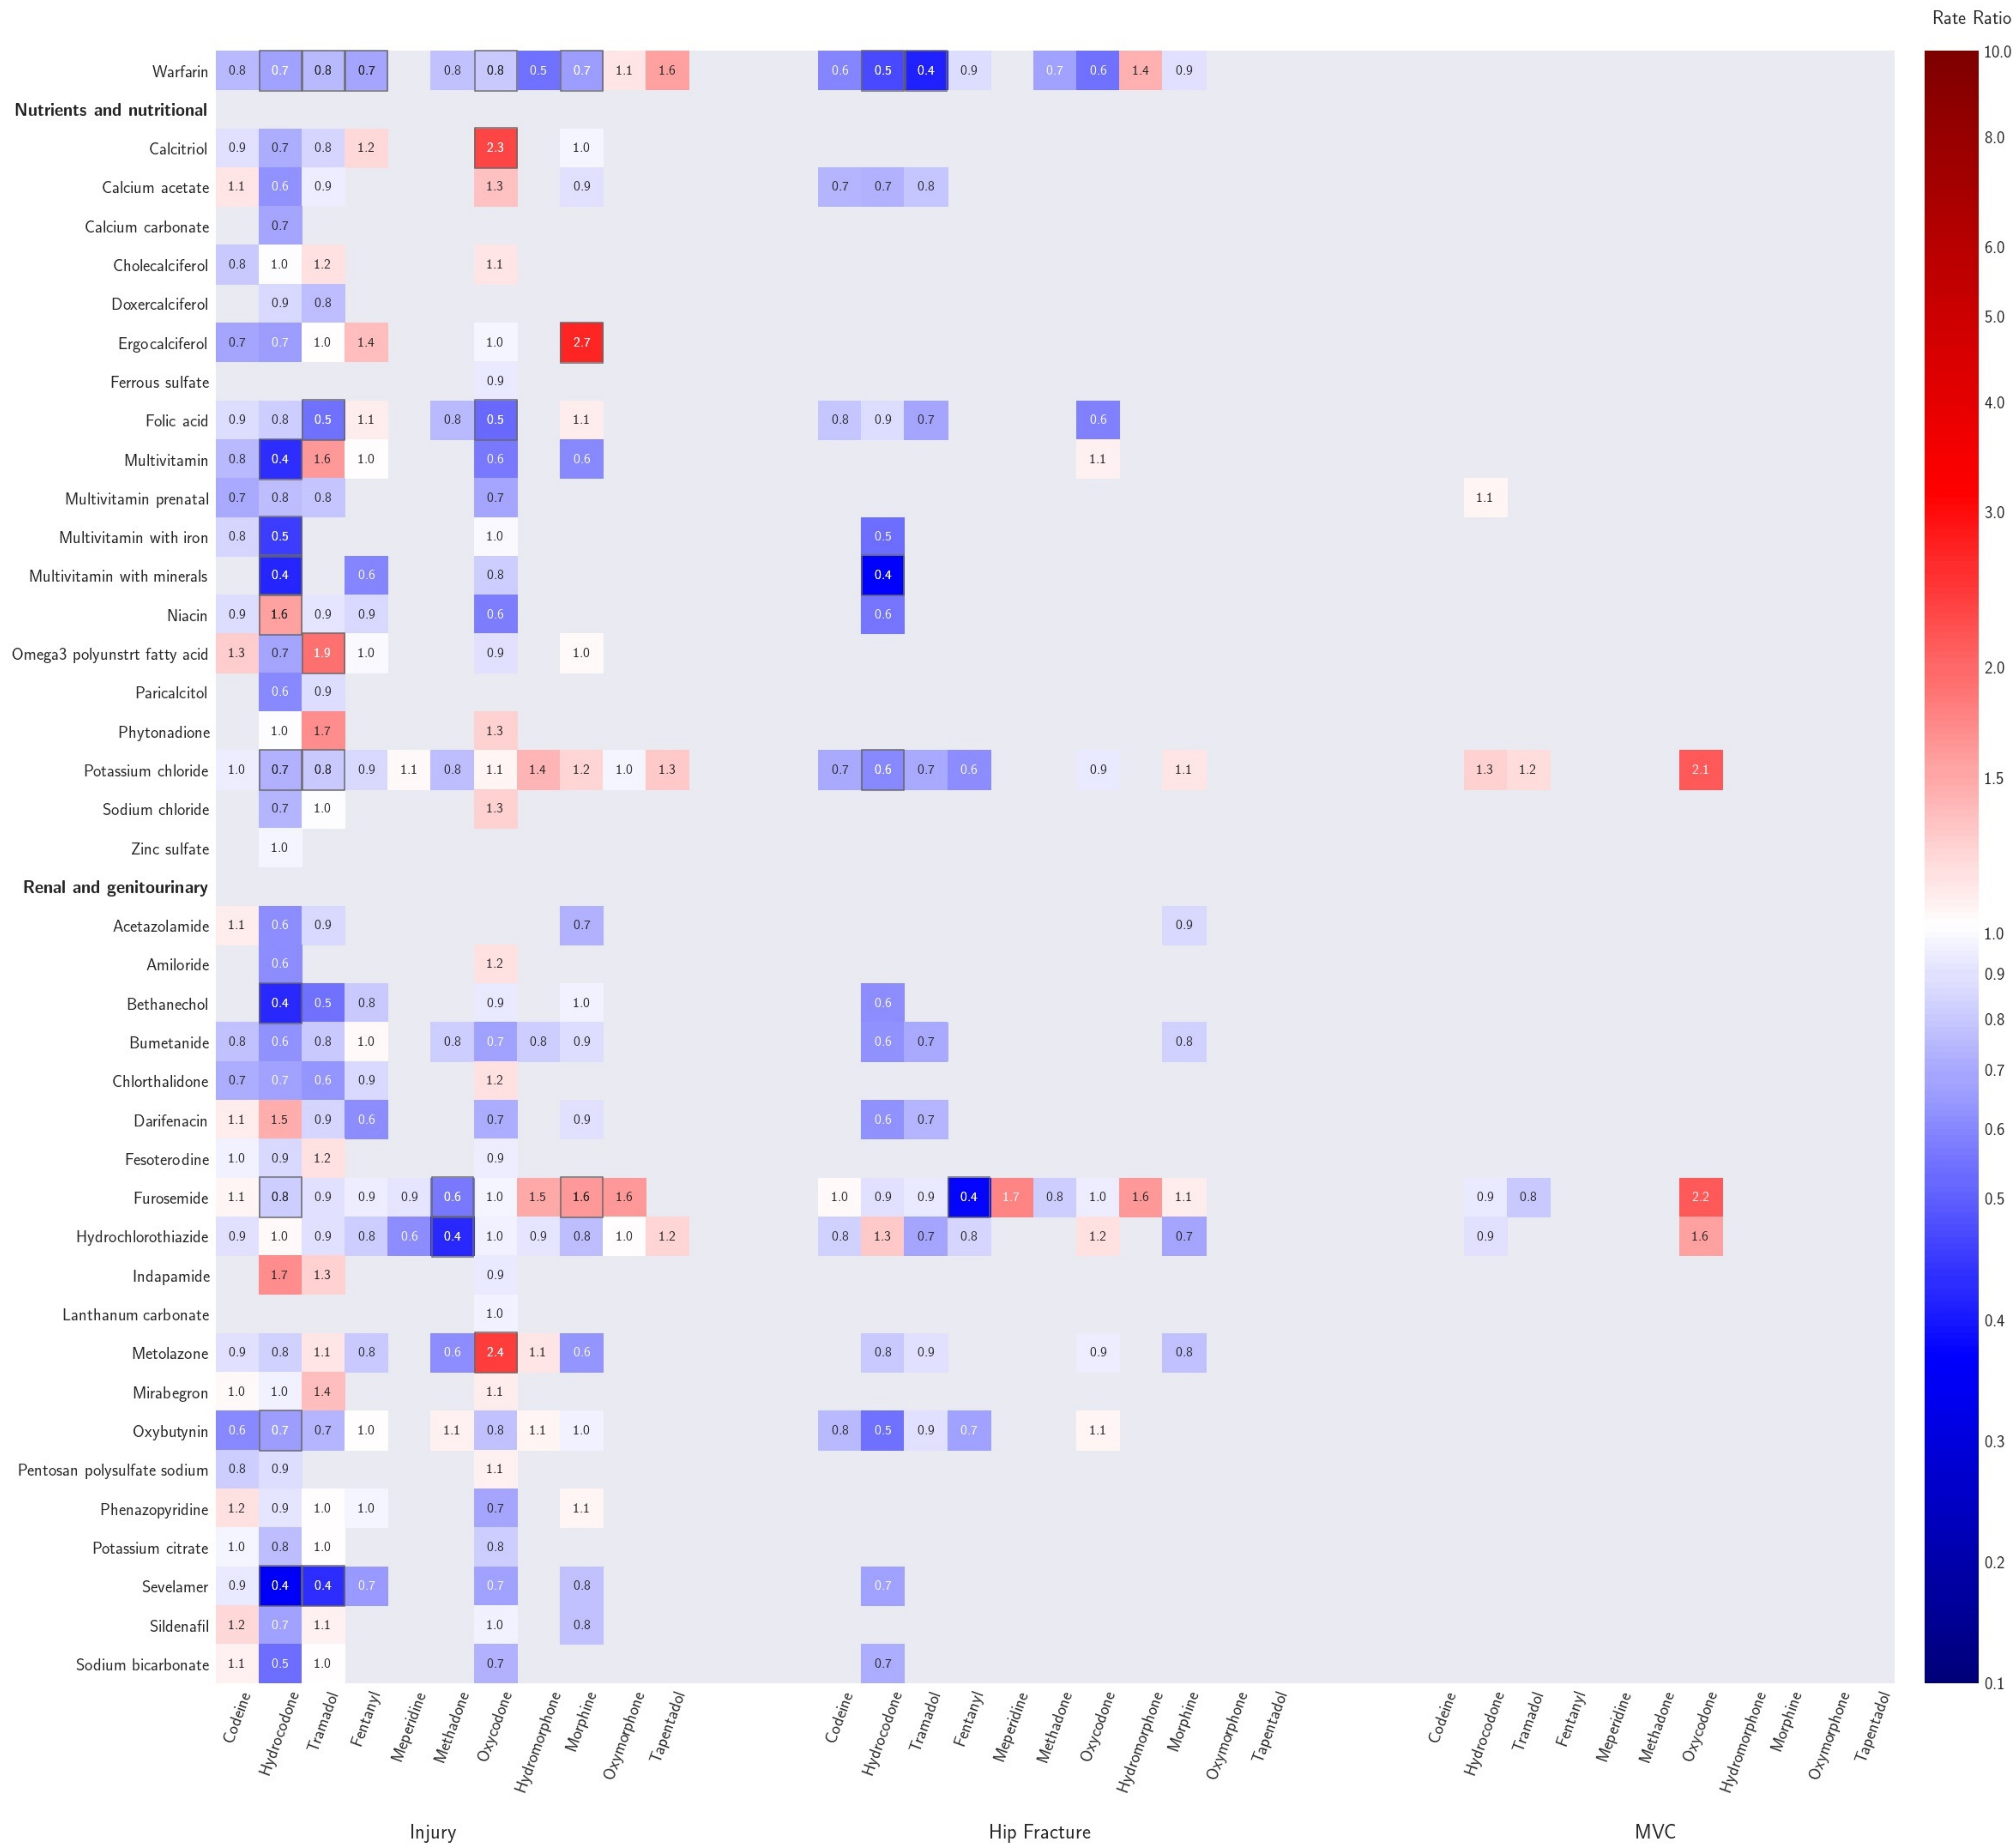

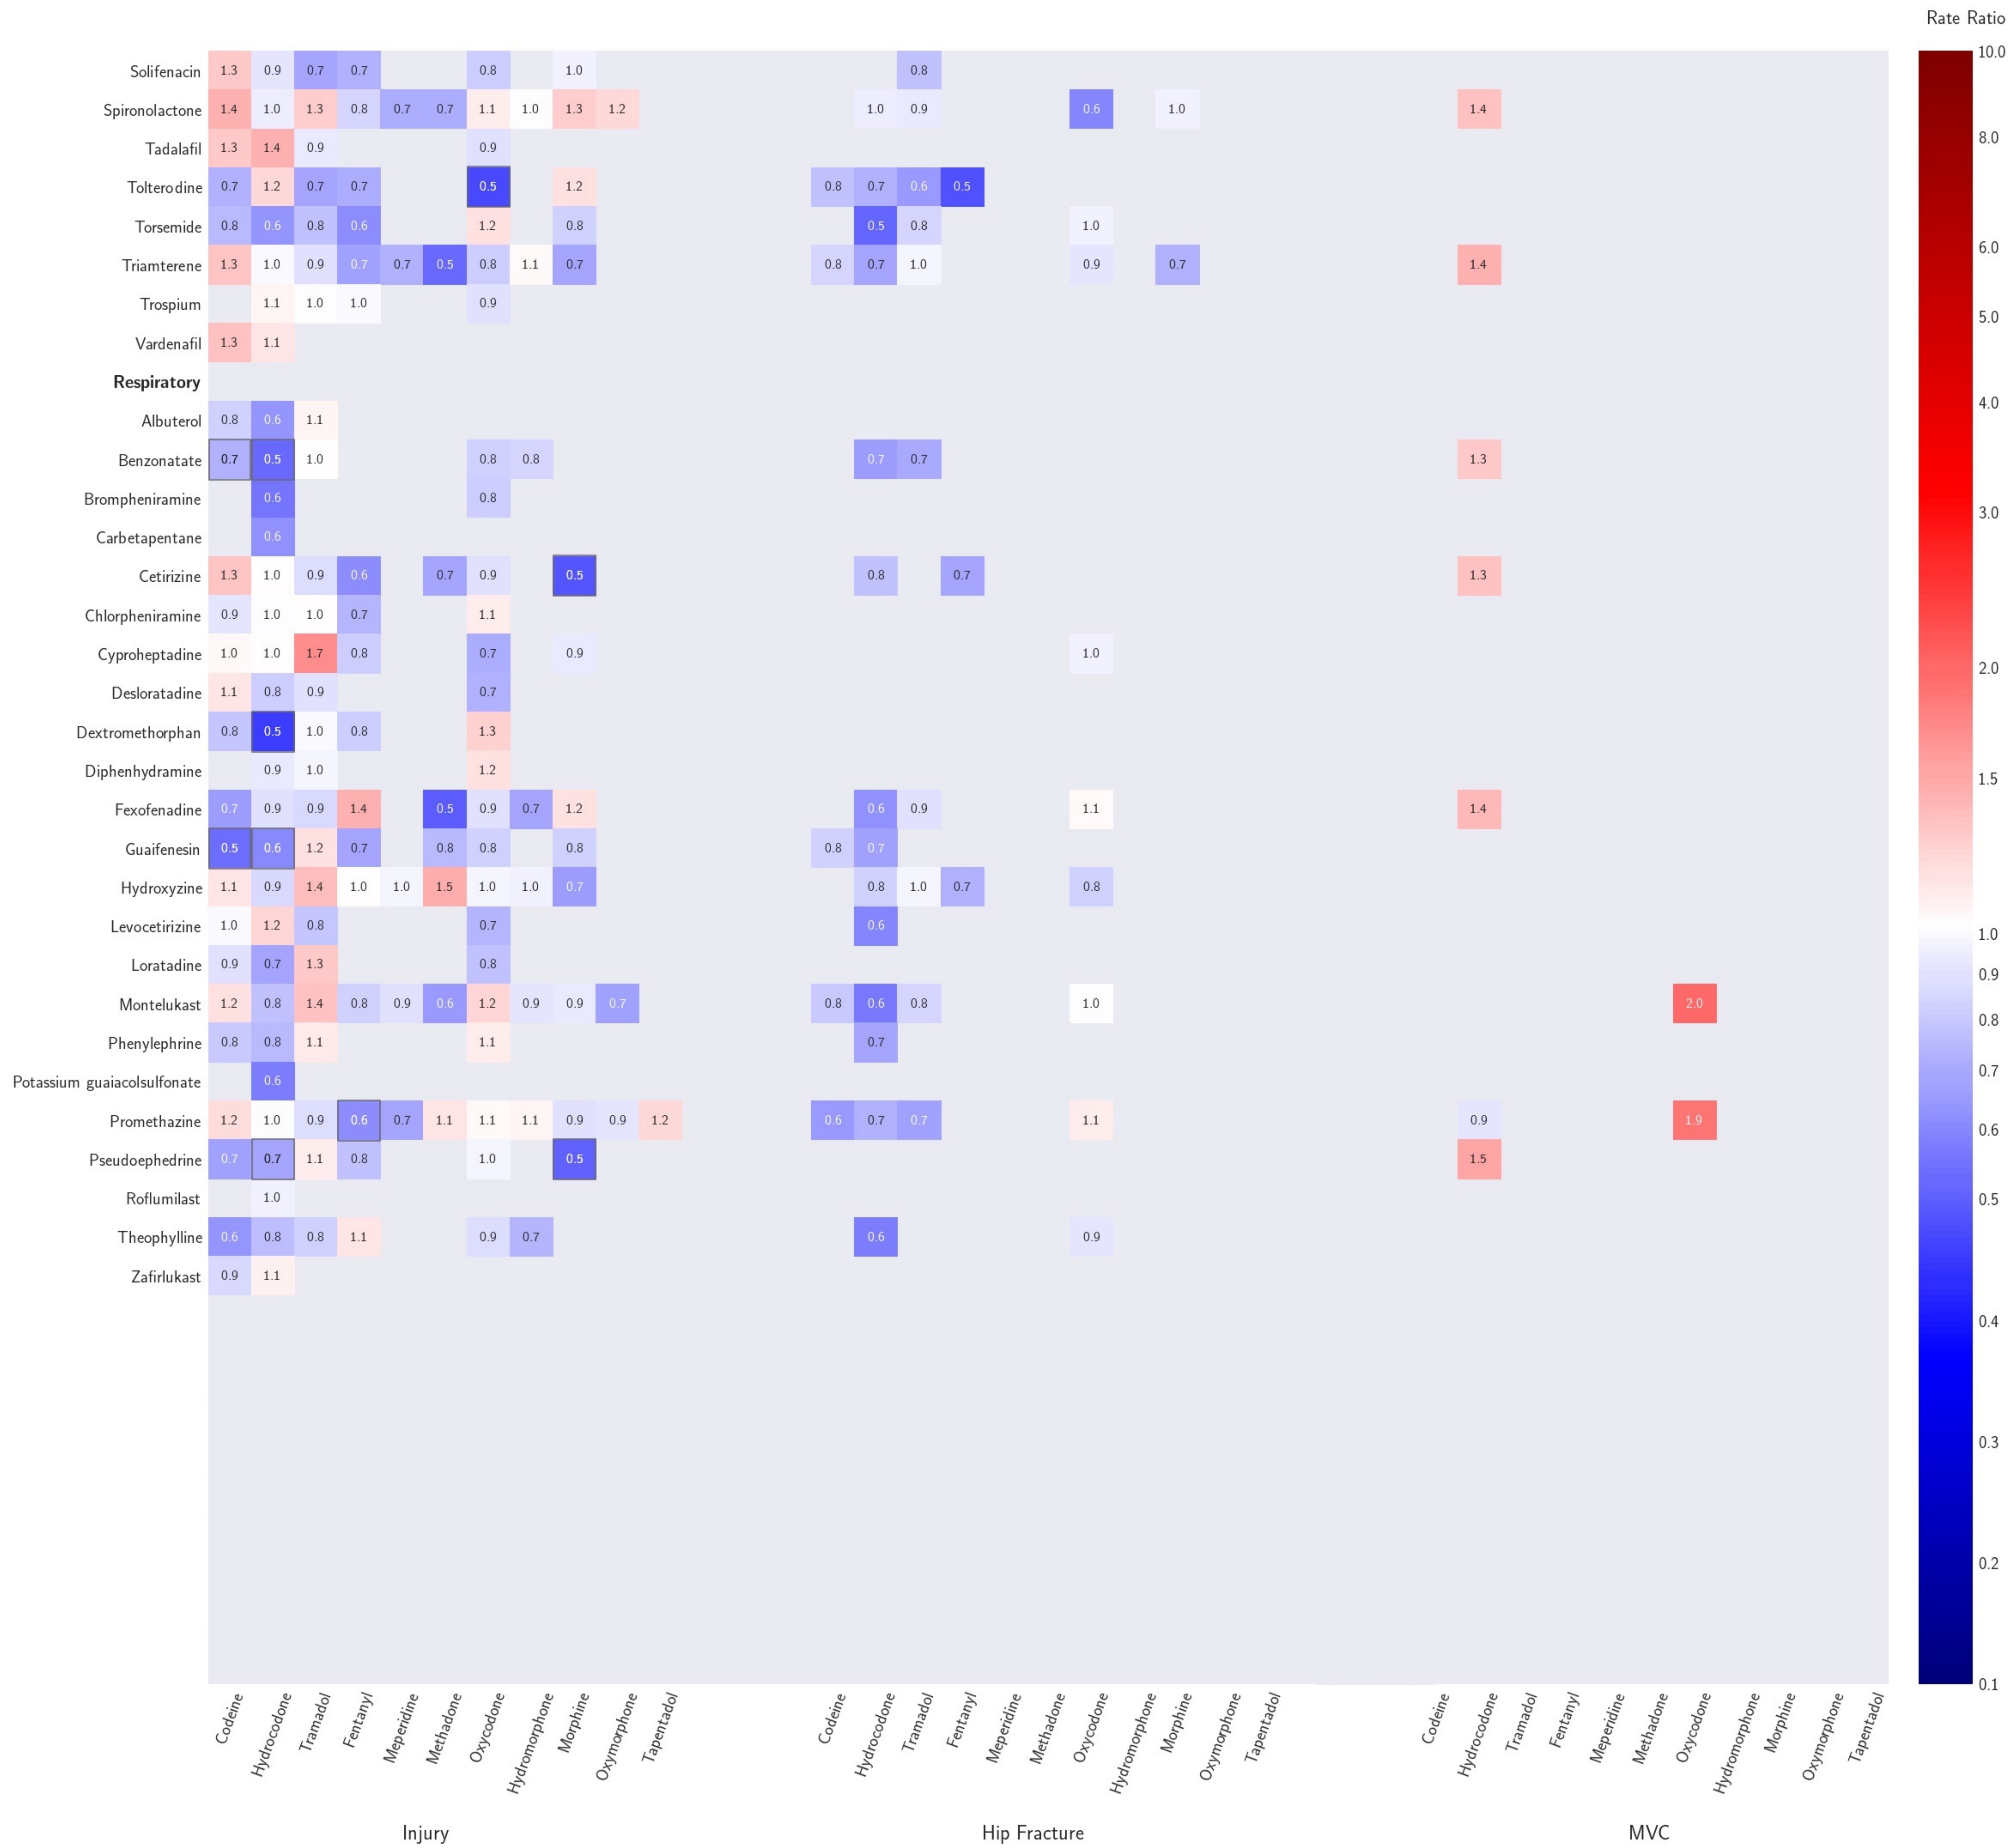

Rate Ratio



Supplement: NIHMS1618269-supplement-5.pdf [file NIHMS1618269-supplement-5.pdf]

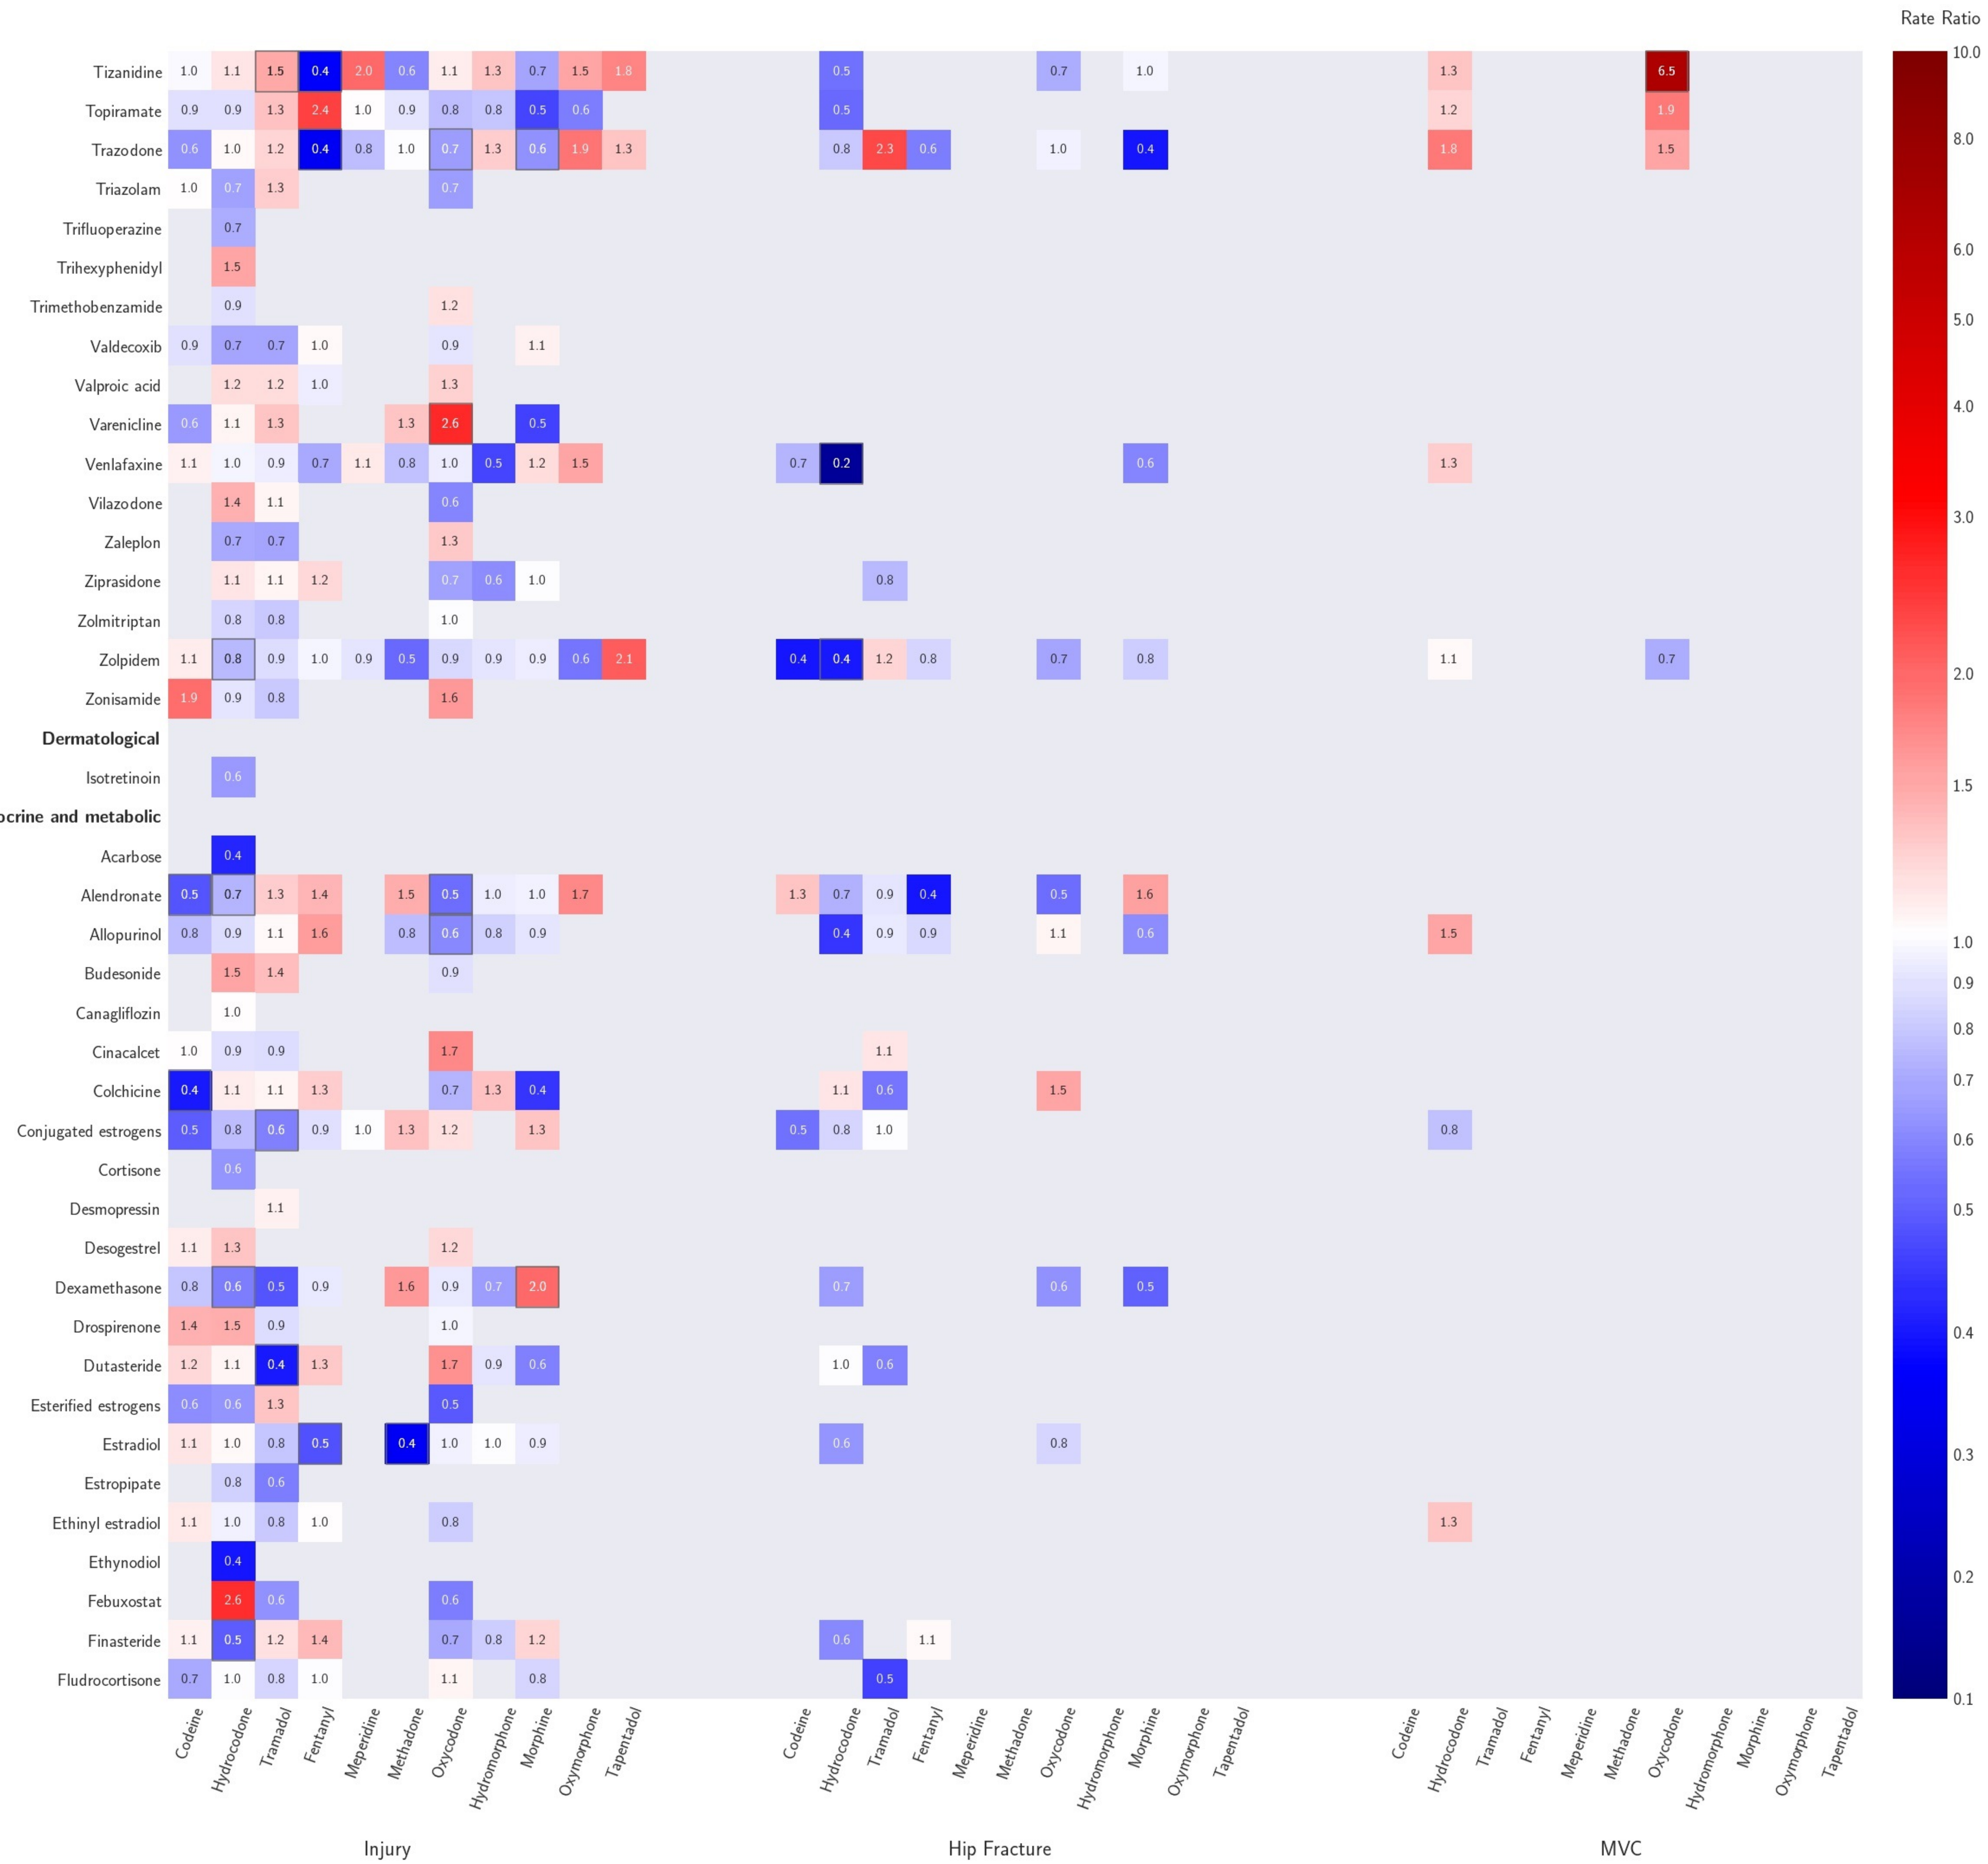

Rate Ratio





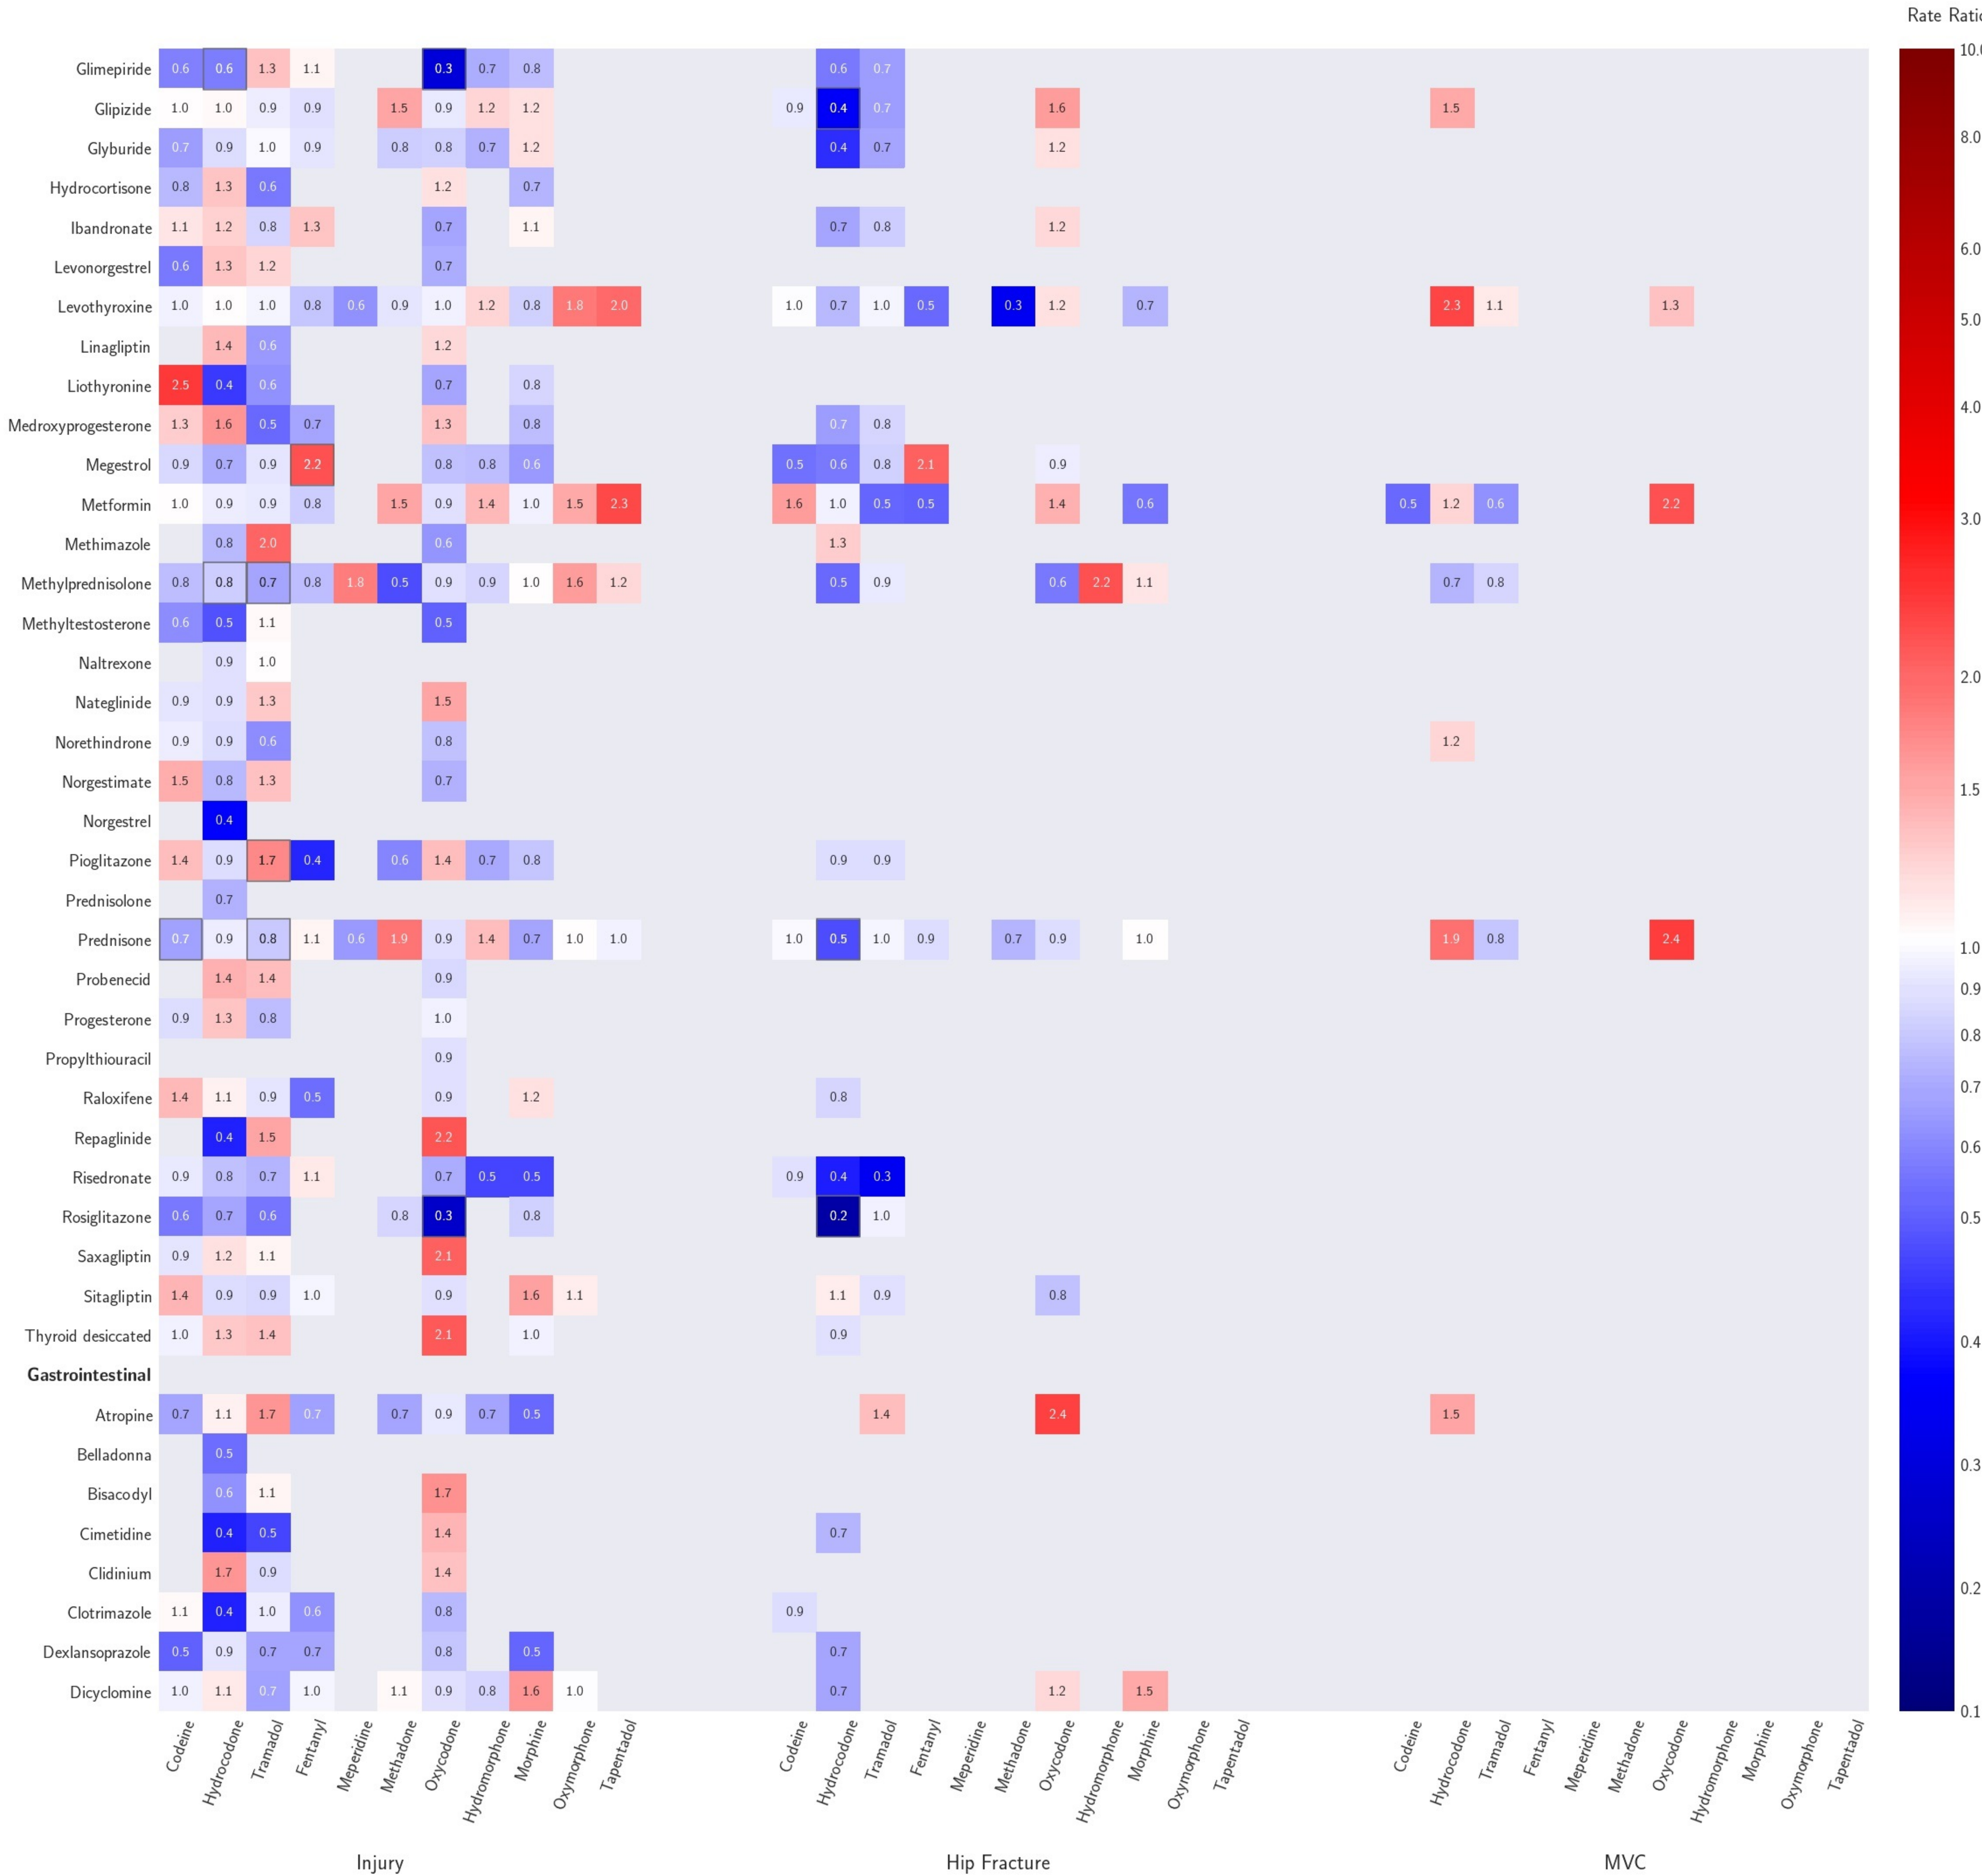

Rate Ratio

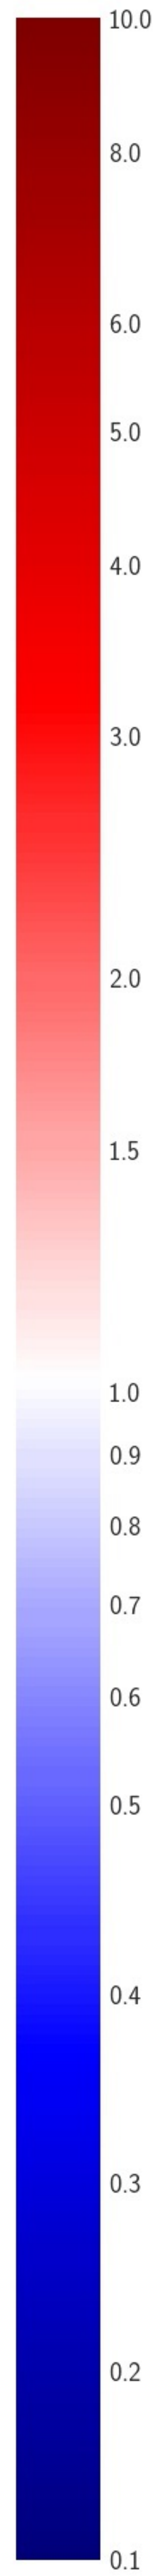

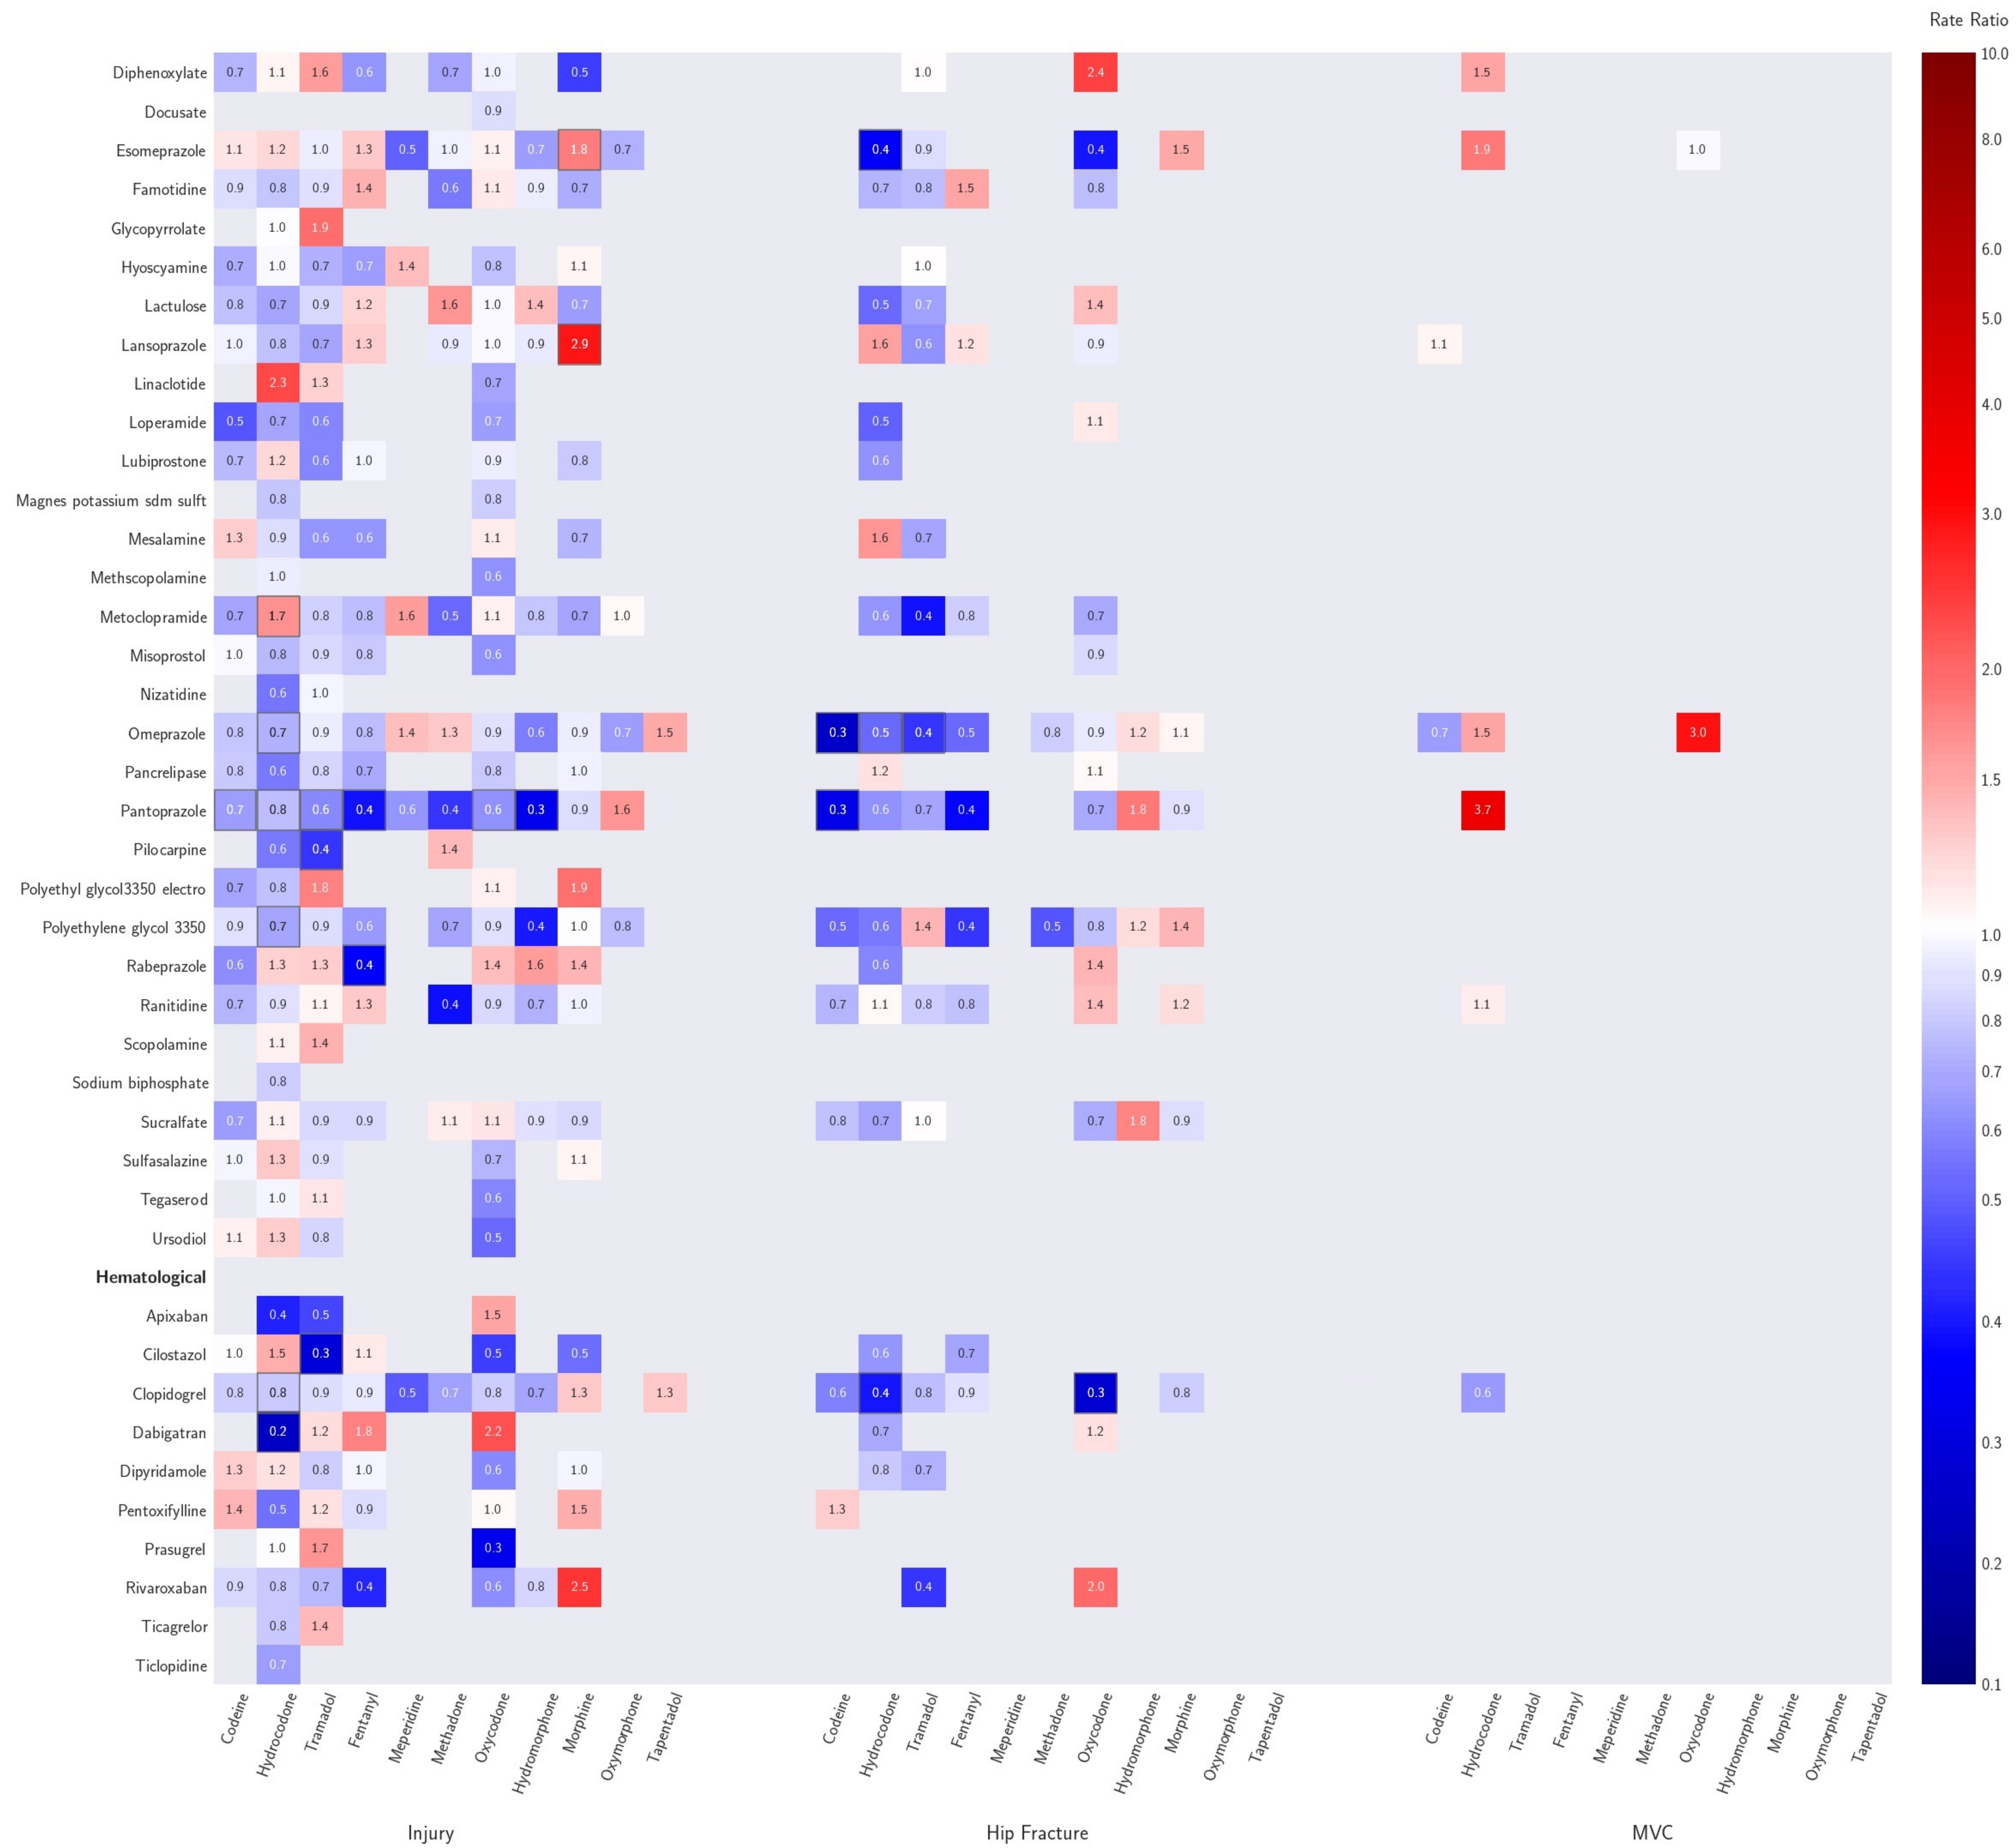

Rate Ratio

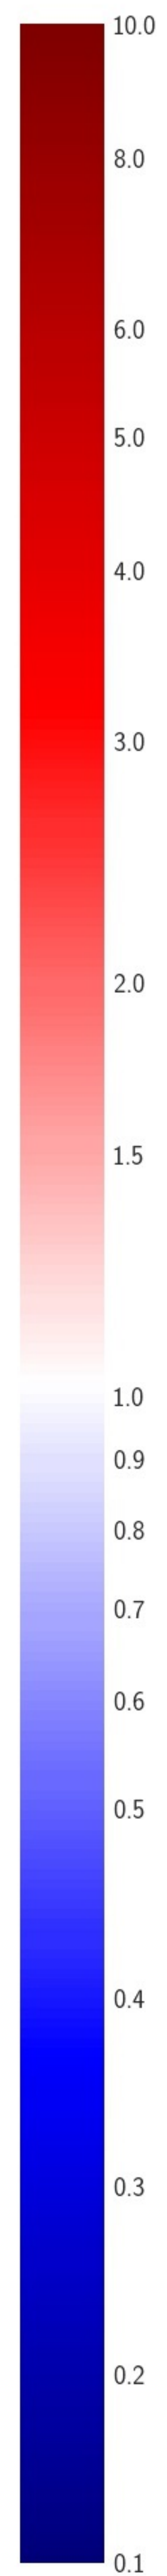

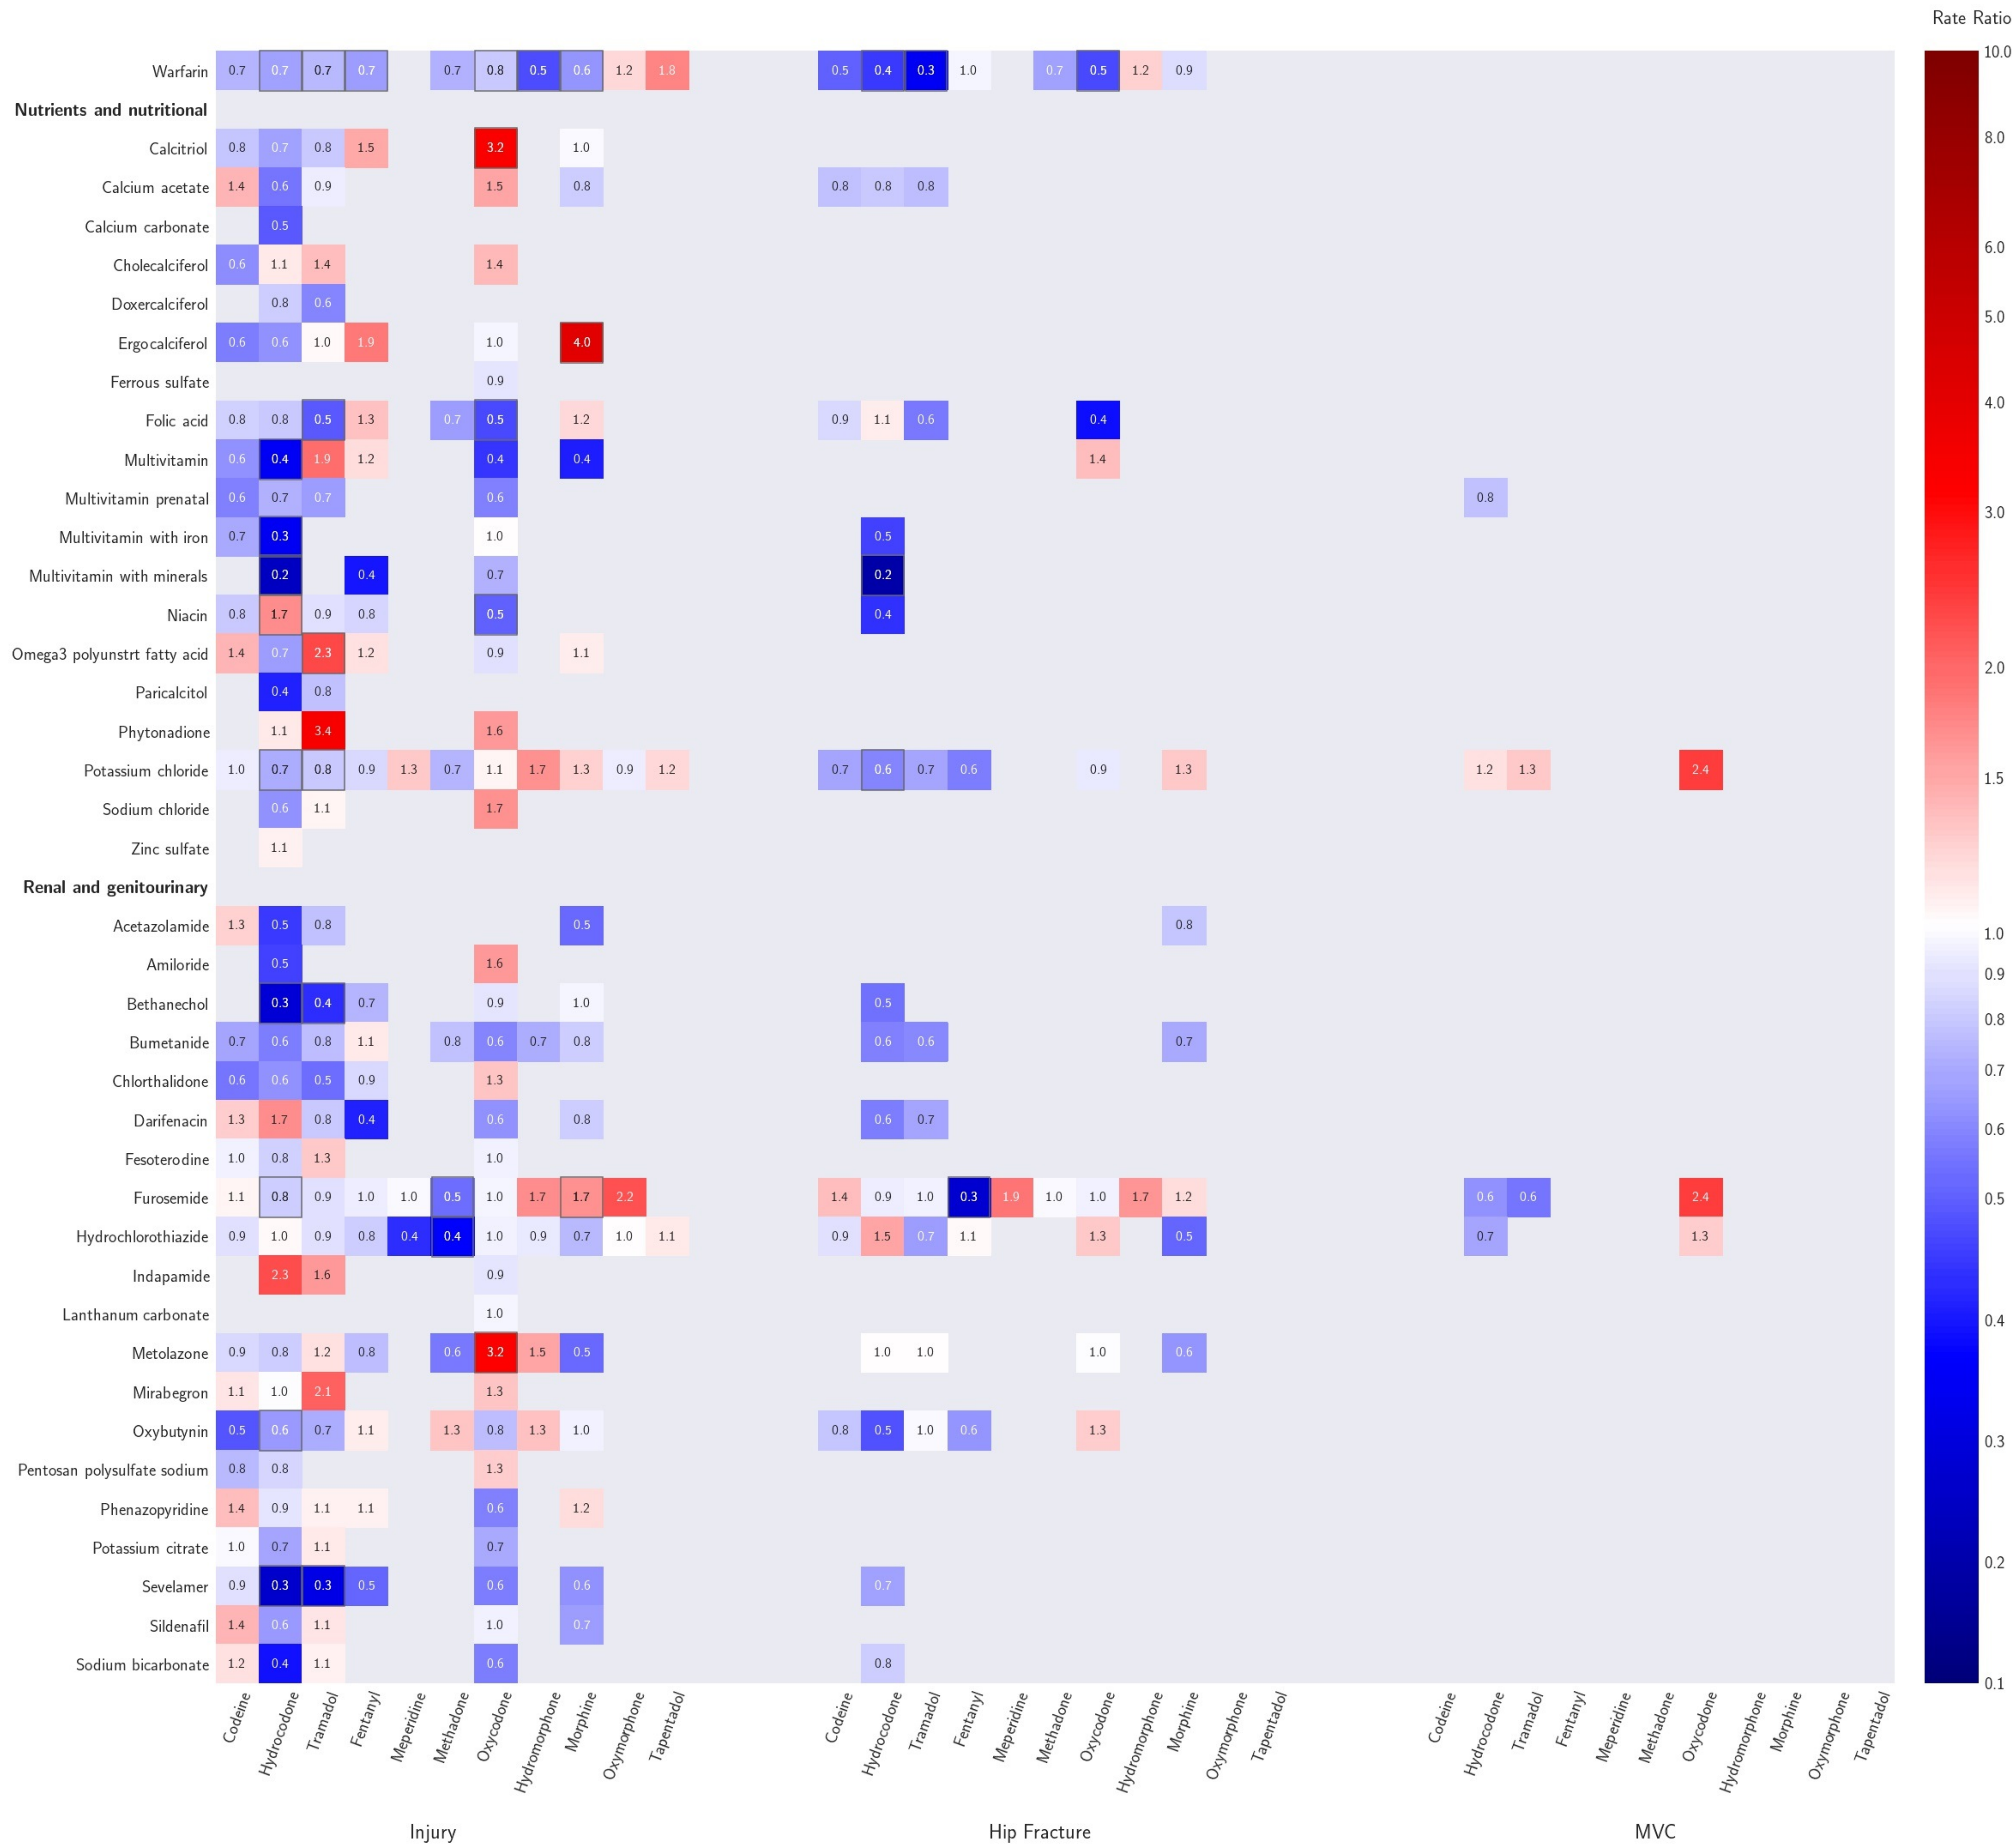

Rate Ratio

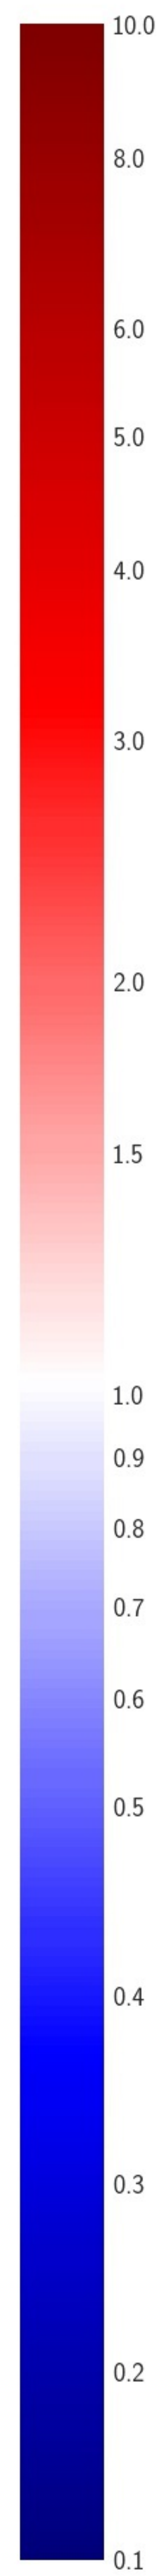

Rate Ratio

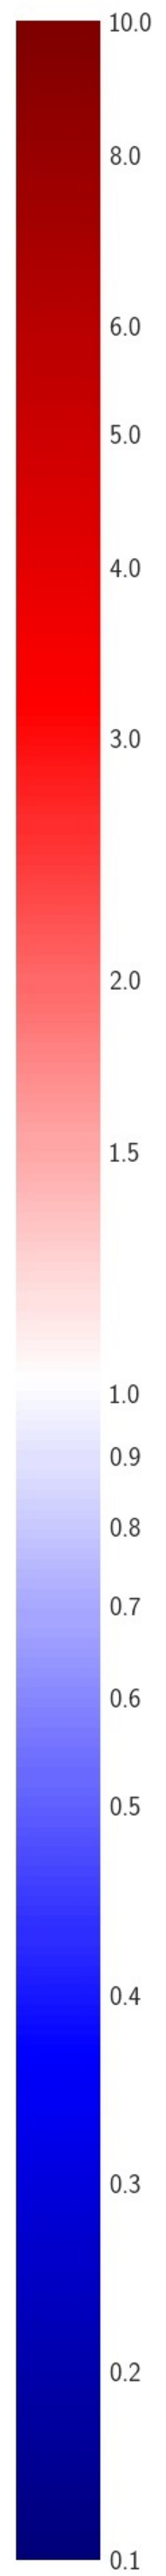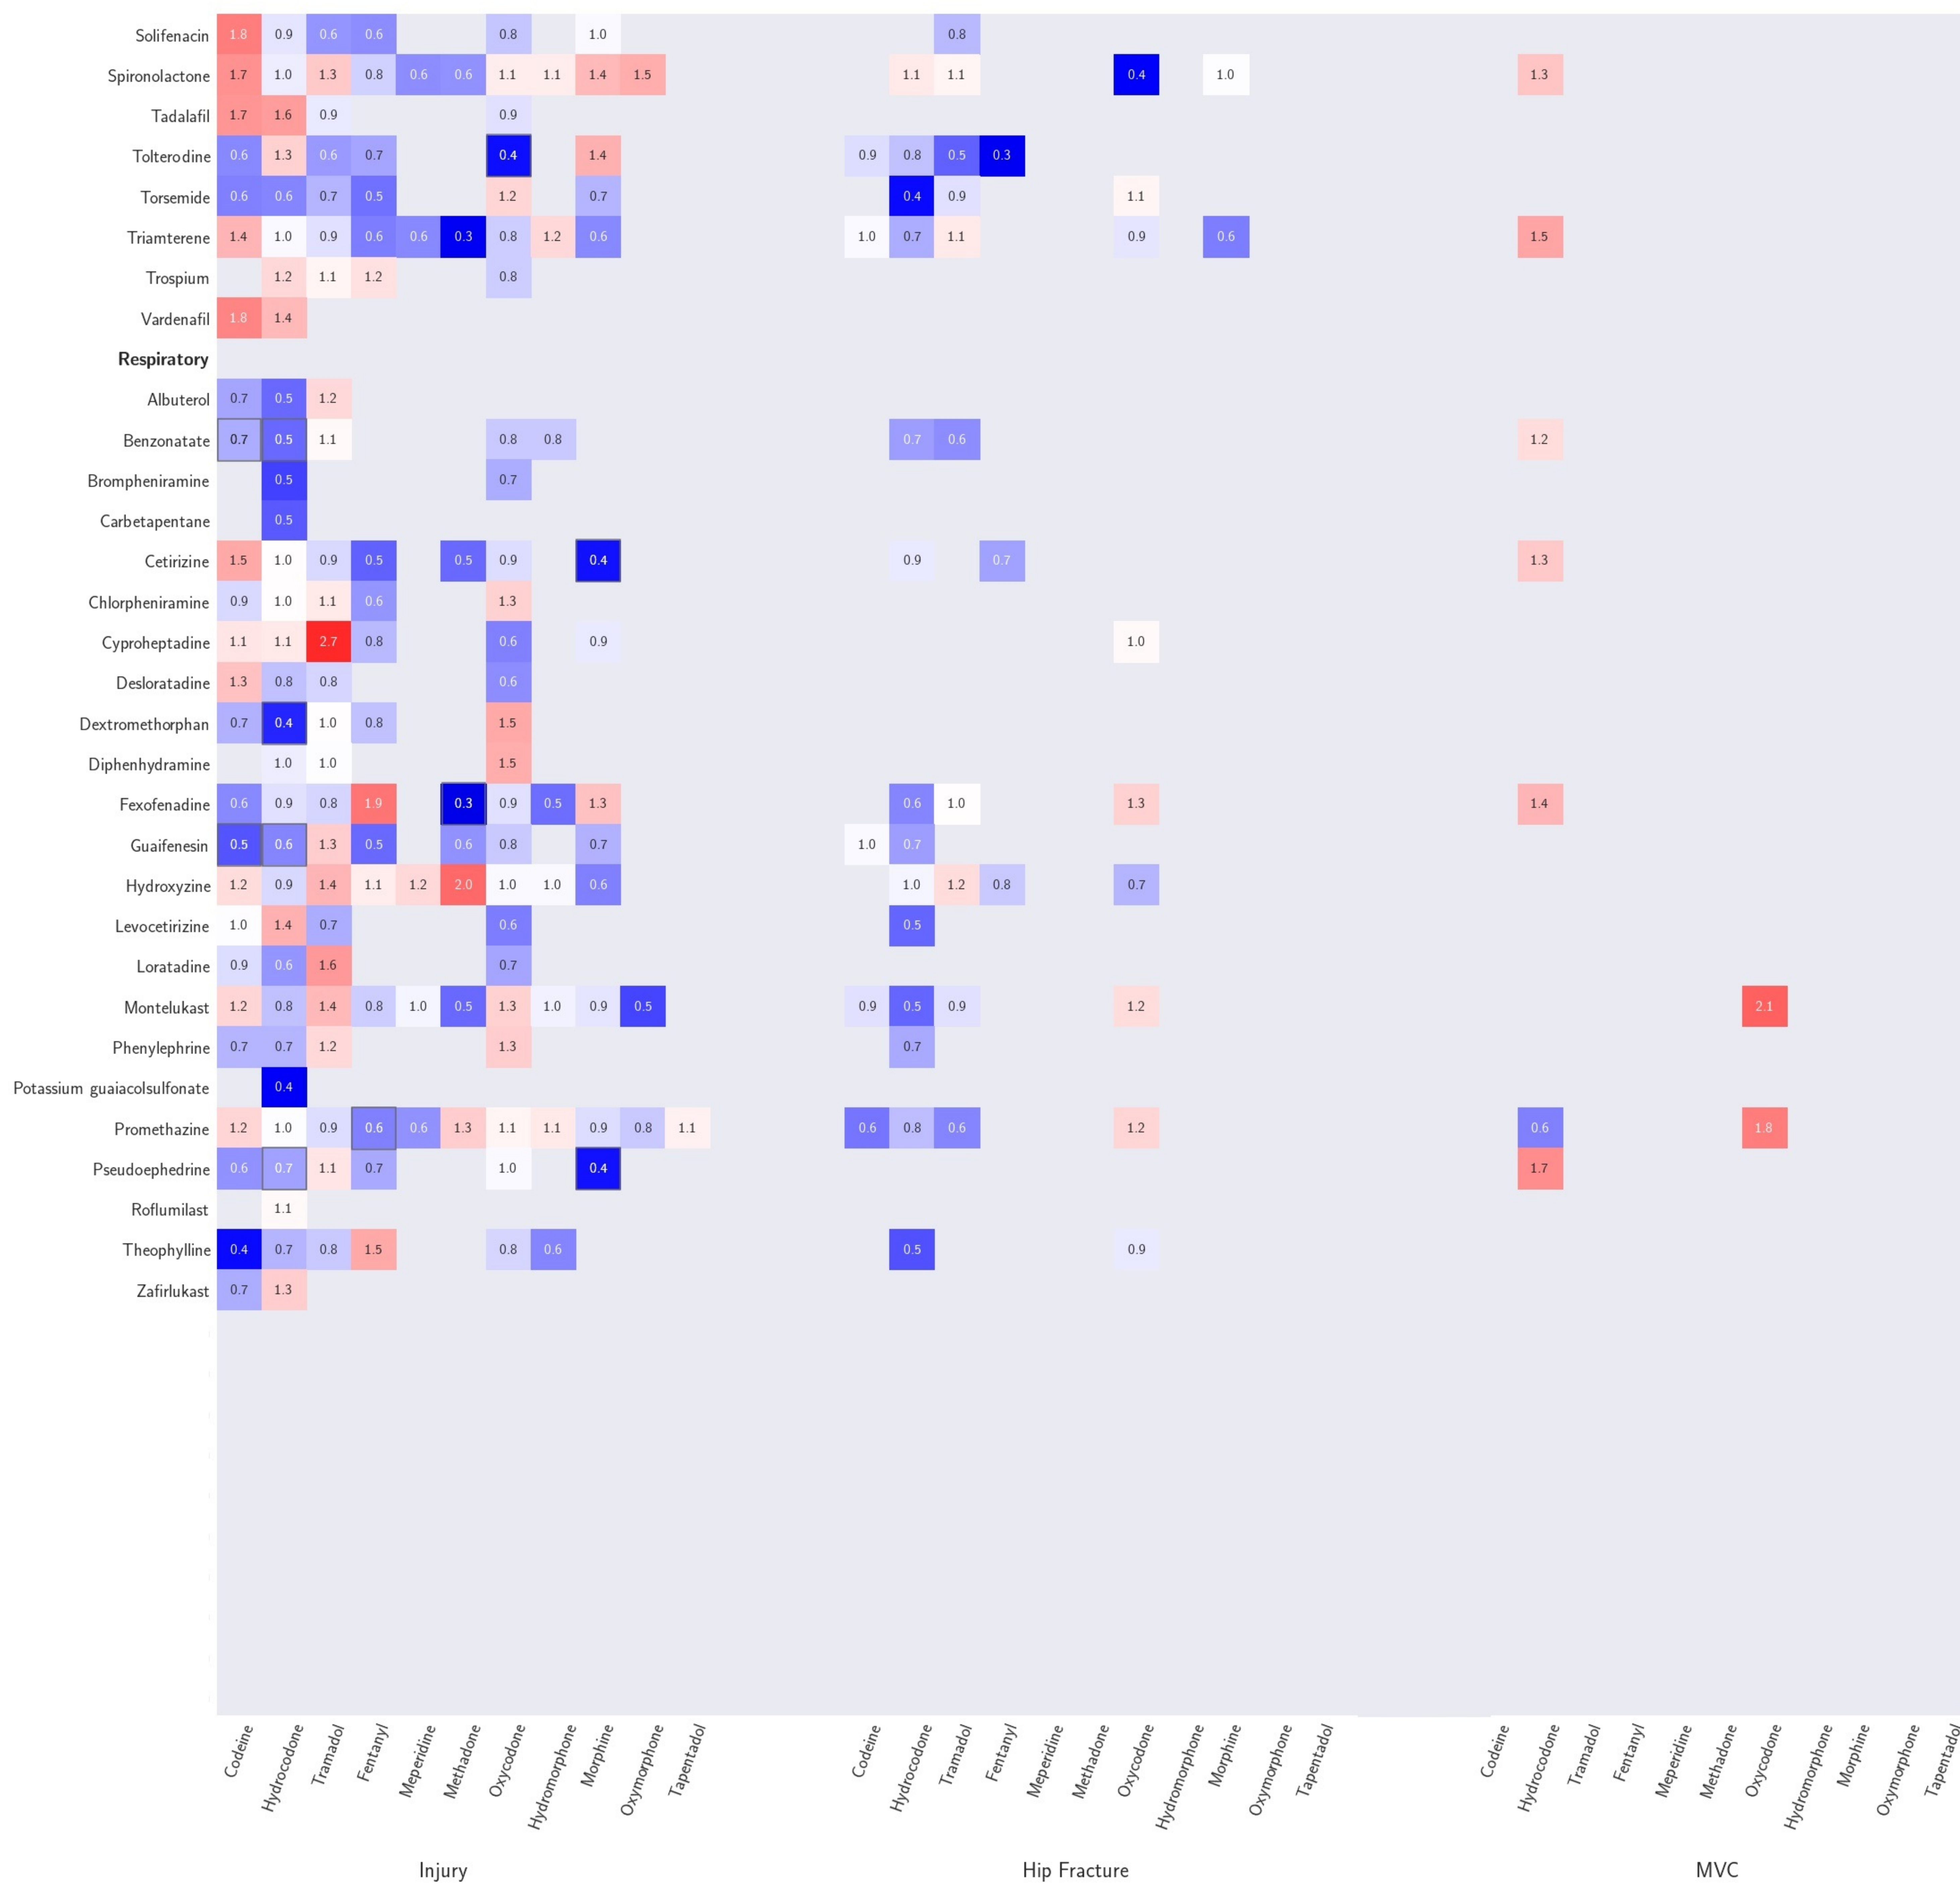

Supplement: NIHMS1618269-supplement-7.pdf [file NIHMS1618269-supplement-7.pdf]
